# Supplementary material for: The Genomic Landscape of Lobular Breast Cancer
Source: Cancers (Basel). 2021 Apr 18;13(8):1950. doi: 10.3390/cancers13081950 (PMC8073944; doi:10.3390/cancers13081950)
Supplement: Supplementary file 1 [file cancers-13-01950-s001.zip › cancers-1163927-supplementary tables.xlsx]

## Sheet: Table S1_WES
Sample ID	Patient ID	Study ID	Age (Diag)	T (TNM)	Grade	ER Status (0=0; 1=pos; 2=TNBC)	HER2 Status	Pam50 subtype	Pos LN	Overall Survival (Months)	Overall Survival (Years)	Overall survival bin	Overall Survival Status	Mutation Count	Normalised mut count /Mb (50 Mb/exome; 1.2/panel; Des 2Mb)	Mut Count (1=<1; 2=1-4.9; 3=5-10; 4=10+	1=classic; 2= pleo; 3=other variant/mixed; 4=solid; 5=trabecular; 6=alveolar; 7=ductal; 0=not assessable)	CDH1	TP53	TBX3	FOXA1	GATA3	ERBB2	ERBB3	PIK3CA	PTEN	CTNNA	AKT1	ROS1	FGFR2	CCND1	BRCA2	BRCA1
MB-6107	MB-6107	metabric	71.38	.	3	1	0	Normal	0	123.333	10.2778	1	1:DECEASED	13	10.8333	4	.	E494Kfs*28	.	.	.	.	.	.	H1047R	.	R126Q	.	.	.	.	.	.
MB-4667	MB-4667	metabric	65.58	T1	3	2	0	Her2	0	295.333	24.6111	1	1:DECEASED	40	33.3333	4	.	Y835*, F833V	E271K	.	.	H15del	.	.	.	.	Q887*	E17K	.	.	.	.	.
P13142	.	Euro	69	T2	2	1	0	.	0	.	2.5	0	alive	15	7.5	3	1	.	p.L350P	.	.	.	.	.	.	.	not profiled	p.L52R	.	.	.	.	.
P14142	.	Euro	34	T2	2	1	0	.	0	.	8.1	0	alive	12	6	3	1	.	.	.	p.F266L	.	.	.	p.E81K	.	not profiled	p.E40K	.	.	.	.	.
P13070	.	Euro	51	T2	2	1	0	.	0	.	13.2	1	death	2	1	2	1	p.G53fs*3	.	.	.	.	.	.	.	.	not profiled	p.E17K	.	.	.	.	.
P13113	.	Euro	55	T2	2	1	0	.	0	.	7.4	0	alive	5	2.5	2	1	.	.	.	.	.	.	.	.	.	not profiled	p.E17K	.	.	.	.	.
P13872	.	Euro	50	T2	2	1	0	.	1	.	5.7	0	alive	11	5.5	3	4	p.S9*	.	.	.	p.S67L	.	.	p.E545K	.	not profiled	p.E17K	.	.	.	.	.
P13936	.	Euro	60	T1	1	1	0	.	0	.	15.6	1	death	9	4.5	2	6	p.F499fs*34	.	.	p.D226Y	.	.	.	.	.	not profiled	p.E17K	.	.	.	.	.
P13939	.	Euro	74	T2	2	1	0	.	0	.	3.2	1	death	3	1.5	2	1	.	.	.	.	.	.	.	.	.	not profiled	p.E17K	.	.	.	.	.
P13943	.	Euro	43	T2	1	1	0	.	1	.	12.5	0	alive	3	1.5	2	1	p.K440N	.	.	.	.	.	.	.	.	not profiled	p.E17K	.	.	.	.	.
P13958	.	Euro	56	T2	1	1	0	.	1	.	11.9	0	alive	6	3	2	4	p.F171fs*3	.	.	.	.	.	p.L924V	p.E545K	.	not profiled	p.E17K	.	.	.	.	.
P14027	.	Euro	38	T2	2	1	0	.	1	.	11	0	alive	8	4	2	1	p.Y827*	.	.	.	.	.	.	.	.	not profiled	p.E17K	.	.	.	.	.
P14079	.	Euro	62	T1	2	1	0	.	1	.	11.3	0	alive	7	3.5	2	4	p.Q647*	.	p.G496fs*135	.	.	.	.	.	.	not profiled	p.E17K	.	.	.	.	.
P14096	.	Euro	70	T1	2	1	0	.	0	.	11.3	0	alive	26	13	4	1	p.C688fs*34	.	.	p.R150L	.	.	.	.	.	not profiled	p.E17K	.	.	.	.	.
P14141	.	Euro	66	T1	2	1	0	.	0	.	6.1	0	alive	8	4	2	1	p.W20*	.	.	.	.	.	.	.	.	not profiled	p.E17K	.	.	.	.	.
P14146	.	Euro	78	T1	2	1	0	.	0	.	10.6	0	alive	10	5	3	1	.	.	.	.	.	.	.	.	.	not profiled	p.E17K	.	.	.	.	.
P14273	.	Euro	49	T2	2	1	0	.	1	.	2.1	1	death	5	2.5	2	6	p.G500fs*37	.	p.N296D	.	.	.	.	.	.	not profiled	p.E17K	.	.	.	.	.
P14289	.	Euro	71	T2	3	1	0	.	1	.	0.7	1	death	6	3	2	4	.	p.C238Y	.	.	.	.	.	.	.	not profiled	p.E17K	.	.	.	.	.
P14309	.	Euro	48	T3	2	1	0	.	1	.	5.3	0	alive	7	3.5	2	5	p.N558fs*4	.	.	.	.	.	.	p.H1047R	.	not profiled	p.E17K	.	.	.	.	.
RL1029	.	RATHER	61	.	2	1	0	.	0		6.58453	1	dead-disease-specific	.	.	.	1	.	.	not profiled	not profiled	.	.	.	mut	.	not profiled	mut	.	.	.	.	.
RL1097	.	RATHER	74	.	2	.	0	.	1	.	1.60986	1	dead-disease-specific	.	.	.	3	mut	.	not profiled	not profiled	.	.	.	.	.	not profiled	mut	.	.	.	.	.
P13045	.	Euro	54	T2	2	1	0	.	1	.	4.5	1	death	3	1.5	2	1	.	.	.	.	p.F410fs*93	.	.	.	.	not profiled	.	.	.	.	.	.
P13046	.	Euro	64	T2	1	0	0	.	0	.	11.5	0	alive	2	1	2	1	.	.	.	.	.	.	.	p.H1047R	.	not profiled	.	.	.	.	.	.
P13047	.	Euro	66	T3	1	1	0	.	0	.	2.1	1	death	2	1	2	1	p.Q448*	.	.	.	.	.	.	.	.	not profiled	.	.	.	.	.	.
P13048	.	Euro	66	T2	1	0	0	.	0	.	12	0	alive	5	2.5	2	1	p.R335*	.	.	.	.	.	.	.	p.Y65C	not profiled	.	.	.	.	.	.
P13049	.	Euro	70	T2	2	2	0	.	1	.	12.1	0	alive	5	2.5	2	1	p.E261*	.	.	.	p.W329C	p.D769Y	.	.	.	not profiled	.	.	.	.	.	.
P13051	.	Euro	65	T3	2	1	0	.	0	.	9.4	0	alive	2	1	2	1	.	.	p.S266fs*12	.	.	.	.	.	.	not profiled	.	.	.	.	.	.
P13052	.	Euro	58	T3	2	1	0	.	0	.	10.1	0	alive	4	2	2	1	.	.	p.A463fs*227	.	.	.	.	.	.	not profiled	.	.	.	.	.	.
P13053	.	Euro	66	T2	2	1	0	.	1	.	1.2	1	death	3	1.5	2	5	p.Q351*	.	.	.	p.M401fs*5	p.L755S	.	.	.	not profiled	.	.	.	.	.	.
P13054	.	Euro	65	T2	2	1	0	.	0	.	10.3	0	alive	1	0.5	1	1	.	.	.	.	.	.	.	.	.	not profiled	.	.	.	.	.	.
P13055	.	Euro	57	T3	2	1	0	.	0	.	4.5	0	alive	4	2	2	1	p.D288A	.	.	.	.	.	.	.	.	not profiled	.	.	.	.	.	.
P13056	.	Euro	51	T3	2	2	0	.	1	.	5	1	death	3	1.5	2	1	.	.	.	p.I176M	.	gain	.	p.I459V	.	not profiled	.	.	.	.	.	.
P13057	.	Euro	57	T2	2	1	0	.	1	.	13.9	1	death	4	2	2	1	.	.	.	.	.	p.R978C	.	.	.	not profiled	.	.	.	.	.	.
P13059	.	Euro	54	T2	2	0	0	.	1	.	15.8	0	alive	4	2	2	1	p.L396fs*2	.	.	.	p.M294K	.	.	p.G118D	.	not profiled	.	.	.	.	.	.
P13060	.	Euro	51	T1	2	1	0	.	1	.	7.1	0	alive	4	2	2	1	p.P744fs*26	.	.	.	.	.	.	p.Q546R	.	not profiled	.	.	.	.	.	.
P13061	.	Euro	65	T1	2	1	0	.	0	.	5.8	1	death	5	2.5	2	1	p.Q23*	.	.	p.S282N	.	.	.	p.E545K	.	not profiled	.	.	.	.	.	.
P13062	.	Euro	77	T2	3	1	1	.	1	.	7.9	0	alive	5	2.5	2	3	p.Q23*	.	.	.	.	p.L755S	.	.	.	not profiled	.	.	.	.	.	.
P13063	.	Euro	46	T2	2	1	0	.	1	.	7.6	0	alive	1	0.5	1	1	.	.	.	.	.	.	.	.	.	not profiled	.	.	.	.	.	.
P13064	.	Euro	58	T3	2	1	0	.	1	.	13.8	0	alive	6	3	2	1	p.I206fs*3	.	.	.	.	p.D769Y	.	p.H1047R	.	not profiled	.	.	.	.	.	.
P13065	.	Euro	64	T1	2	1	0	.	1	.	5.3	1	death	8	4	2	1	.	.	p.Y271fs*1	p.S250F	.	.	.	p.E545A	.	not profiled	.	.	.	.	.	.
P13067	.	Euro	58	T2	2	1	0	.	0	.	4.7	0	alive	0	0	1	1	.	.	.	.	.	.	.	.	.	not profiled	.	.	.	.	.	.
P13068	.	Euro	48	T2	2	1	0	.	1	.	7.5	0	alive	3	1.5	2	1	p.D254Y	.	.	.	p.N320fs*37	.	.	.	.	not profiled	.	.	.	.	.	.
P13069	.	Euro	44	T1	2	1	0	.	0	.	12.8	0	alive	4	2	2	1	p.T340fs*16	.	.	.	.	.	.	.	.	not profiled	.	.	.	.	.	.
P13071	.	Euro	65	T2	2	1	0	.	1	.	12.7	0	alive	6	3	2	1	p.Y753fs*4	p.L111Q	.	.	.	.	.	p.E542K	.	not profiled	.	.	.	.	.	.
P13072	.	Euro	59	T2	2	1	0	.	0	.	13.5	0	alive	4	2	2	1	.	.	p.G129E	.	.	.	.	p.E545K	.	not profiled	.	.	.	.	.	.
P13073	.	Euro	54	T3	3	1	0	.	1	.	1.3	1	death	5	2.5	2	4	.	.	p.P134T	.	.	p.V697L	.	.	.	not profiled	.	.	.	.	.	.
P13074	.	Euro	58	T1	3	1	0	.	1	.	12.8	0	alive	3	1.5	2	5	p.Q64*	.	.	.	.	.	.	p.E545K	.	not profiled	.	.	.	.	.	.
P13075	.	Euro	69	T2	2	1	0	.	0	.	5.1	0	alive	5	2.5	2	1	.	.	p.P422fs*203	.	p.K358fs*47	.	.	p.H1047R	.	not profiled	.	.	.	.	.	.
P13076	.	Euro	53	T2	2	1	0	.	0	.	10.6	0	alive	5	2.5	2	1	p.S70fs*24	.	.	.	.	.	.	p.E600K	.	not profiled	.	.	.	.	.	.
P13077	.	Euro	77	T1	2	1	0	.	1	.	3.9	0	alive	4	2	2	1	p.Q23fs*11	.	.	p.A458fs*100	.	.	.	.	.	not profiled	.	.	.	.	.	.
P13078	.	Euro	50	T3	1	1	0	.	1	.	12.9	0	alive	2	1	2	1	p.Q610*	.	.	.	.	.	.	.	.	not profiled	.	.	.	.	.	.
P13079	.	Euro	63	T2	2	1	0	.	1	.	9.9	0	alive	3	1.5	2	1	p.A541fs*17	.	.	.	.	.	.	.	p.T319fs*1	not profiled	.	.	.	.	.	.
P13080	.	Euro	61	T2	3	1	1	.	1	.	1.7	1	death	7	3.5	2	4	p.F39fs*18	p.H179D	.	.	.	.	.	p.H1047R	.	not profiled	.	.	.	.	.	.
P13081	.	Euro	48	T1	2	1	0	.	0	.	9.9	0	alive	6	3	2	1	.	.	.	.	.	.	p.E928G	.	.	not profiled	.	.	.	.	.	.
P13082	.	Euro	61	T3	2	1	0	.	1	.	9.6	0	alive	3	1.5	2	1	.	.	.	.	.	.	.	p.H1047R	.	not profiled	.	.	.	.	.	.
P13083	.	Euro	52	T2	1	1	0	.	0	.	10.3	0	alive	6	3	2	1	.	.	.	.	.	.	.	.	.	not profiled	.	.	.	.	.	.
P13084	.	Euro	54	T1	1	1	0	.	0	.	8.6	0	alive	6	3	2	1	p.R335*	.	.	.	.	.	.	.	.	not profiled	.	.	.	.	.	.
P13086	.	Euro	59	T3	2	1	0	.	1	.	1.1	1	death	11	5.5	3	1	p.E208*	p.L348F	.	.	.	p.L755S	.	.	.	not profiled	.	.	.	.	.	.
P13088	.	Euro	48	T1	2	1	0	.	0	.	8.3	0	alive	3	1.5	2	1	p.D288fs*6	.	.	.	.	.	.	.	.	not profiled	.	.	.	.	.	.
P13089	.	Euro	43	T1	2	1	0	.	0	.	7.7	1	death	2	1	2	5	p.L355fs*13	.	.	.	.	.	.	.	.	not profiled	.	.	.	.	.	.
P13090	.	Euro	52	T2	2	1	0	.	1	.	7.3	0	alive	6	3	2	5	p.Q23*	.	.	.	.	.	.	.	.	not profiled	.	.	.	.	.	.
P13092	.	Euro	47	T2	2	1	0	.	1	.	15	0	alive	0	0	1	5	.	.	.	.	.	.	.	.	.	not profiled	.	.	.	.	.	.
P13095	.	Euro	69	T3	3	1	0	.	1	.	3.9	1	death	7	3.5	2	4	p.W20*	.	.	.	.	.	.	.	.	not profiled	.	.	.	.	.	.
P13096	.	Euro	59	T2	2	1	0	.	0	.	4.1	1	death	6	3	2	1	p.I650fs*13	.	p.Q590*	.	.	.	.	p.C420R	.	not profiled	.	.	.	.	.	.
P13101	.	Euro	68	T1	2	1	0	.	1	.	8.3	0	alive	5	2.5	2	5	p.T474fs*10	.	.	.	.	.	.	.	.	not profiled	.	.	.	.	.	.
P13103	.	Euro	85	T2	2	1	0	.	1	.	5	1	death	3	1.5	2	5	.	.	.	.	.	.	.	p.E545K	.	not profiled	.	.	.	.	.	.
P13106	.	Euro	71	T1	2	1	0	.	0	.	13	0	alive	6	3	2	4	.	.	p.F513fs*119	.	.	.	.	p.R108C	.	not profiled	.	.	.	.	p.I605fs*9	.
P13107	.	Euro	60	T1	2	1	0	.	0	.	9	0	alive	5	2.5	2	1	.	.	p.E195fs*13	.	.	.	.	p.H1047R	.	not profiled	.	.	.	.	.	.
P13110	.	Euro	50	T2	2	1	0	.	0	.	7.1	0	alive	13	6.5	3	1	p.H92N	.	.	.	.	.	.	.	.	not profiled	.	.	.	.	.	.
P13114	.	Euro	58	T2	2	1	0	.	0	.	8.2	0	alive	8	4	2	1	.	.	.	.	.	.	.	.	.	not profiled	.	.	.	.	.	.
P13116	.	Euro	55	T1	2	1	0	.	0	.	9.2	0	alive	13	6.5	3	1	p.L343fs*13	.	.	.	.	.	.	.	.	not profiled	.	.	.	.	.	.
P13118	.	Euro	72	T3	2	1	0	.	1	.	5.1	1	death	11	5.5	3	1	p.C28fs*29	.	.	.	.	.	.	.	.	not profiled	.	.	.	.	.	.
P13128	.	Euro	80	T3	2	2	0	.	0	.	3.5	0	alive	12	6	3	1	p.E353fs*1	.	.	p.I176M	.	.	.	.	.	not profiled	.	.	.	.	.	.
P13131	.	Euro	69	T1	2	1	0	.	0	.	10.1	0	alive	4	2	2	1	p.T474fs*9	p.E336*	.	.	.	.	.	.	.	not profiled	.	.	.	.	.	.
P13132	.	Euro	82	T2	2	1	0	.	0	.	9.1	0	alive	6	3	2	1	p.Q23*	.	p.A173fs*34	p.M253R	.	.	.	.	.	not profiled	.	.	.	.	.	.
P13133	.	Euro	79	T1	2	1	0	.	1	.	7.5	0	alive	4	2	2	4	p.P826fs*21	.	.	.	.	.	.	.	.	not profiled	.	.	.	.	.	.
P13134	.	Euro	40	T1	1	1	0	.	0	.	7.2	0	alive	2	1	2	1	.	.	.	.	.	.	.	p.E545K	.	not profiled	.	.	.	.	.	.
P13135	.	Euro	54	T2	1	1	0	.	0	.	8.7	0	alive	9	4.5	2	1	.	.	.	.	.	.	p.G908R	p.N345K	.	not profiled	.	.	.	.	.	.
P13138	.	Euro	69	T2	2	1	0	.	1	.	5.5	0	alive	2	1	2	1	p.G704fs*18	.	.	.	.	.	.	.	.	not profiled	.	.	.	.	.	.
P13139	.	Euro	69	T2	3	1	0	.	1	.	9.7	1	death	3	1.5	2	4	.	.	.	.	p.P409fs*99	.	.	.	.	not profiled	.	.	.	.	.	.
P13140	.	Euro	48	T3	2	1	0	.	0	.	8	0	alive	2	1	2	1	p.D183fs*32	.	.	.	.	.	.	.	.	not profiled	.	.	.	.	.	.
P13141	.	Euro	45	T1	2	1	0	.	1	.	7.5	0	alive	3	1.5	2	1	p.Q610*	.	.	.	.	.	.	p.H1047R	.	not profiled	.	.	.	.	.	.
P13143	.	Euro	80	T1	2	1	0	.	0	.	12.8	0	alive	6	3	2	5	.	.	.	.	.	broad gain	.	.	.	not profiled	.	.	.	.	.	.
P13145	.	Euro	57	T2	1	1	0	.	0	.	12.2	0	alive	3	1.5	2	1	.	.	p.P134T	.	.	.	.	.	.	not profiled	.	.	.	.	.	.
P13146	.	Euro	50	T2	2	1	0	.	0	.	9.1	0	alive	4	2	2	5	p.R44fs*15	.	.	.	p.T323fs*30	.	.	.	.	not profiled	.	.	.	.	.	.
P13147	.	Euro	40	T2	2	1	0	.	1	.	8.5	0	alive	2	1	2	1	p.L582fs*2	.	.	.	.	.	.	p.H1047R	.	not profiled	.	.	.	.	.	.
P13148	.	Euro	67	T1	2	1	.	.	0	.	7.3	1	death	6	3	2	1	.	.	.	.	.	.	.	.	.	not profiled	.	.	.	.	.	.
P13149	.	Euro	49	T2	2	1	0	.	0	.	5.1	0	alive	2	1	2	1	p.R50fs*9	.	.	.	.	.	.	.	.	not profiled	.	.	.	.	.	.
P13150	.	Euro	62	T1	2	1	0	.	0	.	2.9	0	alive	6	3	2	1	.	.	.	p.S250F	.	.	.	p.E545K	.	not profiled	.	.	.	.	.	.
P13151	.	Euro	60	T1	2	1	0	.	1	.	17.8	0	alive	7	3.5	2	5	.	.	.	.	.	.	.	p.H1047L	.	not profiled	.	.	.	.	.	.
P13152	.	Euro	80	T2	2	1	0	.	0	.	5.9	0	alive	10	5	3	1	p.P595fs*7	.	.	p.I176V	.	.	.	p.H1047R	.	not profiled	.	.	.	.	.	.
P13153	.	Euro	49	T3	1	1	0	.	1	.	13.5	0	alive	9	4.5	2	1	p.V202fs*14	.	.	.	.	.	.	.	.	not profiled	.	.	.	.	.	.
P13155	.	Euro	75	T1	2	1	0	.	0	.	8.6	0	alive	3	1.5	2	5	.	.	.	.	.	.	.	.	.	not profiled	.	.	.	.	.	.
P13156	.	Euro	72	T2	2	1	0	.	1	.	11	1	death	4	2	2	1	.	.	.	.	.	.	.	p.H1047R	.	not profiled	.	.	.	.	.	.
P13157	.	Euro	70	T2	2	1	0	.	1	.	10.6	0	alive	8	4	2	4	p.D183fs*31	.	.	.	p.S408fs*99	.	.	p.H1047R	.	not profiled	.	.	.	.	.	.
P13158	.	Euro	52	T2	2	0	1	.	1	.	2	1	death	1	0.5	1	1	.	.	.	.	.	focal gain	.	.	.	not profiled	.	.	.	.	.	.
P13824	.	Euro	53	T3	2	1	0	.	1	.	12.2	0	alive	10	5	3	3	.	.	p.Q84fs*4	.	.	.	.	.	.	not profiled	.	.	.	.	p.A902V	.
P13825	.	Euro	48	T2	1	1	0	.	0	.	14.2	0	alive	15	7.5	3	1	p.N369fs*24	.	p.R314fs*7	.	.	.	.	.	.	not profiled	.	.	.	.	p.A186fs*2	.
P13828	.	Euro	69	T1	2	1	0	.	0	.	11.3	0	alive	8	4	2	4	p.D587fs*3	.	.	.	.	.	.	p.H1047R	.	not profiled	.	.	.	.	.	.
P13832	.	Euro	42	T1	2	1	0	.	1	.	2.6	1	death	3	1.5	2	4	p.G196fs*19	.	.	.	.	.	.	.	.	not profiled	.	.	.	.	.	.
P13834	.	Euro	50	T1	2	1	0	.	0	.	11	1	death	12	6	3	6	p.R63*	.	.	.	.	.	.	p.E545K	.	not profiled	.	.	.	.	.	.
P13838	.	Euro	49	T3	2	1	0	.	1	.	7.2	1	death	10	5	3	1	p.A234fs*11	.	.	.	.	.	.	.	.	not profiled	.	.	.	.	.	.
P13840	.	Euro	76	T2	2	1	0	.	0	.	13.4	0	alive	8	4	2	4	p.D528fs*8	.	.	.	.	.	.	p.E542K	.	not profiled	.	.	p.N550K	.	.	.
P13841	.	Euro	55	T1	3	2	0	.	1	.	2.1	1	death	7	3.5	2	3	.	.	.	.	.	.	.	.	.	not profiled	.	.	.	.	.	.
P13849	.	Euro	59	T1	1	1	0	.	.	.	13.3	0	alive	6	3	2	6	p.R43fs*13	.	.	.	.	.	.	.	.	not profiled	.	.	.	.	.	.
P13858	.	Euro	64	T1	2	1	0	.	0	.	17.2	0	alive	9	4.5	2	4	p.D288A	.	.	.	.	.	p.E928G	.	.	not profiled	.	.	.	.	.	.
P13859	.	Euro	47	T1	2	1	0	.	0	.	1.4	1	death	6	3	2	6	p.A636fs*27	.	.	.	.	.	.	.	.	not profiled	.	.	.	.	.	.
P13862	.	Euro	74	T1	2	1	0	.	.	.	0.4	1	death	4	2	2	6	.	.	.	.	.	.	.	.	.	not profiled	.	.	.	.	.	.
P13866	.	Euro	59	T3	2	1	0	.	0	.	8.3	0	alive	9	4.5	2	6	p.E497K	.	.	.	.	.	.	p.E545K	.	not profiled	.	.	.	.	.	.
P13867	.	Euro	60	T1	2	1	0	.	1	.	13.5	0	alive	4	2	2	1	p.Q610*	.	.	.	.	.	p.E928G	.	.	not profiled	.	.	.	.	.	.
P13871	.	Euro	47	T1	3	1	0	.	1	.	9.7	0	alive	7	3.5	2	3	.	.	.	.	.	.	.	p.H1047R	.	not profiled	.	.	.	.	.	.
P13874	.	Euro	86	T2	2	1	0	.	1	.	0.5	1	death	7	3.5	2	4	.	.	.	.	.	.	.	.	.	not profiled	.	.	.	.	.	.
P13875	.	Euro	54	T2	3	1	0	.	0	.	16.5	1	death	11	5.5	3	1	p.I665fs*8	.	.	.	.	.	.	.	.	not profiled	.	.	.	.	.	.
P13893	.	Euro	53	T2	2	1	0	.	1	.	13.3	0	alive	6	3	2	3	p.V119fs*91	.	.	.	.	p.S310F	.	.	.	not profiled	.	.	.	.	.	.
P13894	.	Euro	56	T3	2	1	0	.	0	.	9.1	0	alive	4	2	2	1	.	p.D208V	.	.	.	.	.	.	.	not profiled	.	.	.	.	.	.
P13898	.	Euro	43	T1	2	1	0	.	0	.	9.2	0	alive	6	3	2	6	p.E463fs*1	.	.	.	.	.	.	.	p.T319fs*1	not profiled	.	.	.	.	.	.
P13901	.	Euro	48	T2	2	1	0	.	1	.	6.5	0	alive	2	1	2	1	p.Q23*	.	.	.	.	.	.	.	.	not profiled	.	.	.	.	.	.
P13903	.	Euro	71	T1	2	1	0	.	0	.	9	0	alive	14	7	3	6	.	.	.	.	.	.	.	p.E81K	.	not profiled	.	.	.	.	.	.
P13904	.	Euro	46	T1	2	1	0	.	1	.	16.4	0	alive	2	1	2	6	p.E47*	.	.	.	.	.	.	.	.	not profiled	.	.	.	.	.	.
P13905	.	Euro	49	T1	2	1	0	.	1	.	13.5	0	alive	2	1	2	6	p.G62fs*22	.	.	.	.	.	.	p.H1047R	.	not profiled	.	.	.	.	.	.
P13906	.	Euro	54	T1	2	1	0	.	0	.	3.8	1	death	4	2	2	1	p.N814fs*6	.	.	.	.	.	.	.	.	not profiled	.	.	.	.	.	.
P13907	.	Euro	56	T3	2	1	0	.	1	.	10.4	1	death	4	2	2	1	.	.	.	.	.	.	.	.	.	not profiled	.	.	.	.	.	.
P13911	.	Euro	50	T1	3	1	0	.	0	.	12	0	alive	30	15	4	4	p.Q351*	.	p.Q590*	.	p.M294K	.	.	p.E542K	.	not profiled	.	.	p.M538I	.	.	.
P13913	.	Euro	48	T3	2	1	0	.	1	.	9.9	1	death	3	1.5	2	1	p.S180F	.	.	.	.	.	.	.	.	not profiled	.	.	.	.	.	.
P13914	.	Euro	71	T2	2	1	0	.	0	.	9	0	alive	2	1	2	1	p.I505fs*17	.	.	.	.	.	.	p.H1047R	.	not profiled	.	.	.	.	.	.
P13915	.	Euro	61	T1	2	1	0	.	0	.	12.5	0	alive	3	1.5	2	1	p.T426fs*20	.	.	.	.	.	.	.	.	not profiled	.	.	.	.	.	.
P13916	.	Euro	45	T1	1	0	0	.	.	.	12.3	0	alive	11	5.5	3	6	.	.	.	.	.	p.D769Y	.	p.Q546R	.	not profiled	.	.	.	.	.	.
P13918	.	Euro	73	T2	2	1	0	.	1	.	6.8	1	death	6	3	2	4	.	.	.	.	.	.	.	.	.	not profiled	.	.	.	.	.	.
P13919	.	Euro	72	T1	2	1	0	.	1	.	11.9	0	alive	10	5	3	4	.	.	.	p.P371S	p.S414fs*94	.	.	.	.	not profiled	.	.	.	.	.	.
P13920	.	Euro	63	T1	2	1	0	.	0	.	12.3	0	alive	7	3.5	2	1	.	.	.	.	.	.	.	p.P447_L455delPVPHGLEDL	.	not profiled	.	.	.	.	.	.
P13922	.	Euro	70	T2	2	1	0	.	1	.	5.2	0	alive	5	2.5	2	1	p.R43fs*13	.	.	.	.	.	.	p.H1047R	.	not profiled	.	.	.	.	.	.
P13923	.	Euro	37	T2	2	0	1	.	1	.	4.7	1	death	4	2	2	1	p.D183fs*16	.	.	.	.	.	p.E928G	.	.	not profiled	.	.	.	.	.	.
P13924	.	Euro	67	T1	2	1	0	.	0	.	14	0	alive	4	2	2	1	p.Q23*	.	.	.	.	.	.	p.E542K	.	not profiled	.	.	.	.	.	.
P13927	.	Euro	56	T1	1	1	0	.	1	.	13	0	alive	6	3	2	1	.	.	.	.	.	.	.	p.H1047R	.	not profiled	.	.	.	.	.	.
P13928	.	Euro	62	T2	2	1	0	.	0	.	12.2	0	alive	11	5.5	3	1	.	.	p.R737fs*152	.	p.L397fs*11	.	.	.	.	not profiled	.	.	.	.	.	.
P13929	.	Euro	68	T2	2	1	0	.	0	.	10.9	0	alive	1	0.5	1	1	p.E702*	.	.	.	.	.	.	.	.	not profiled	.	.	.	.	.	.
P13930	.	Euro	69	T1	2	1	0	.	0	.	8.4	0	alive	1	0.5	1	6	p.W20fs*14	.	.	.	.	.	.	.	.	not profiled	.	.	.	.	.	.
P13931	.	Euro	49	T1	2	1	0	.	0	.	11.5	0	alive	10	5	3	3	p.W156*	.	.	.	.	p.L869R	.	p.H1047R	.	not profiled	.	.	.	.	.	.
P13933	.	Euro	60	T2	2	1	0	.	1	.	8.2	1	death	11	5.5	3	6	.	.	.	.	.	.	.	p.E545K	.	not profiled	.	.	.	.	.	.
P13934	.	Euro	60	T1	2	1	0	.	1	.	11.9	0	alive	2	1	2	1	.	.	.	.	.	.	.	p.H1047L	.	not profiled	.	.	.	.	.	.
P13935	.	Euro	48	T3	2	1	0	.	1	.	8.7	1	death	8	4	2	3	p.Q23*	.	.	.	.	.	.	p.N345K	.	not profiled	.	.	.	.	.	.
P13937	.	Euro	43	T1	1	1	0	.	1	.	12.8	1	death	2	1	2	6	p.Q448*	.	.	.	.	.	.	.	.	not profiled	.	.	.	.	.	.
P13938	.	Euro	59	T2	2	1	0	.	1	.	1.7	1	death	4	2	2	1	.	.	.	.	.	.	.	p.V344M	.	not profiled	.	.	.	.	.	.
P13940	.	Euro	64	T1	2	1	0	.	.	.	10.1	0	alive	2	1	2	6	.	.	.	.	.	.	.	.	.	not profiled	.	.	.	.	.	.
P13941	.	Euro	42	T1	2	1	0	.	1	.	13.1	0	alive	2	1	2	6	.	p.H214R	.	.	.	.	.	.	.	not profiled	.	.	.	.	.	.
P13942	.	Euro	72	T2	2	1	0	.	1	.	0.7	1	death	2	1	2	6	p.Y302fs*1	.	.	.	.	.	.	p.H1047L	.	not profiled	.	.	.	.	.	.
P13944	.	Euro	80	T2	3	2	0	.	1	.	0.5	1	death	3	1.5	2	4	.	p.T155N	.	.	.	.	.	.	.	not profiled	.	.	.	.	.	.
P13945	.	Euro	86	T1	2	1	0	.	.	.	8.4	1	death	7	3.5	2	6	p.Y190fs*9	.	.	.	.	.	.	.	.	not profiled	.	.	.	.	.	.
P13946	.	Euro	54	T3	2	1	0	.	1	.	2.1	1	death	4	2	2	6	p.Y561fs*3	.	.	.	.	.	.	p.H1047R	.	not profiled	.	.	.	.	.	.
P13947	.	Euro	57	T1	2	1	0	.	0	.	6.1	1	death	7	3.5	2	1	p.Q765*	.	.	.	.	.	.	p.E545K	.	not profiled	.	.	.	.	.	.
P13948	.	Euro	49	T3	2	1	0	.	1	.	11.9	0	alive	5	2.5	2	1	p.T515fs*27	.	.	.	.	.	.	p.Y1021H	.	not profiled	.	.	.	.	.	.
P13949	.	Euro	56	T2	3	1	0	.	0	.	7.2	1	death	3	1.5	2	3	p.Q129*	.	.	.	.	.	.	.	.	not profiled	.	.	.	.	.	.
P13950	.	Euro	69	T2	1	1	0	.	0	.	9.1	0	alive	5	2.5	2	6	p.D291fs*3	.	.	.	.	.	.	p.Y343F	.	not profiled	.	.	.	.	.	.
P13951	.	Euro	57	T1	2	1	0	.	0	.	11.6	0	alive	5	2.5	2	6	p.Q23*	.	.	.	.	.	.	.	.	not profiled	.	.	.	.	.	.
P13952	.	Euro	53	T1	1	1	0	.	0	.	12.8	0	alive	3	1.5	2	3	p.Q647*	.	.	.	.	.	.	p.E365K	.	not profiled	.	.	.	.	.	.
P13953	.	Euro	62	T2	1	1	0	.	0	.	8.9	1	death	2	1	2	1	p.L652fs*1	.	.	.	.	.	.	p.H1047R	.	not profiled	.	.	.	.	.	.
P13955	.	Euro	40	T3	3	1	0	.	1	.	11.6	1	death	3	1.5	2	3	.	.	p.R251fs*9	.	.	.	.	.	p.C296fs*1	not profiled	.	.	.	.	.	.
P13956	.	Euro	39	T1	3	1	0	.	1	.	13.4	1	death	5	2.5	2	6	.	.	.	.	.	.	.	.	p.E256fs*40	not profiled	.	.	.	.	.	.
P13957	.	Euro	68	T2	3	1	1	.	1	.	12.1	0	alive	11	5.5	3	6	.	.	.	.	.	.	.	.	.	not profiled	.	.	.	.	.	.
P13959	.	Euro	69	T1	3	2	0	.	0	.	11	0	alive	11	5.5	3	4	p.E243K	p.D281H	.	.	.	.	.	.	.	not profiled	.	.	.	.	.	.
P13960	.	Euro	45	T1	2	1	0	.	0	.	14.7	0	alive	6	3	2	6	p.Q23*	.	.	.	.	.	.	.	p.K102fs*11	not profiled	.	.	.	.	.	.
P13962	.	Euro	50	T1	2	1	0	.	0	.	4	1	death	6	3	2	6	p.E547fs*7	.	.	.	.	.	.	.	.	not profiled	.	.	.	.	.	.
P13969	.	Euro	67	T1	3	1	0	.	1	.	2.4	1	death	4	2	2	6	p.N536fs*21	.	.	.	.	.	.	p.H1047R	.	not profiled	.	.	.	.	.	.
P13972	.	Euro	58	T2	3	1	0	.	1	.	7.8	0	alive	3	1.5	2	4	p.S146fs*69	.	.	.	.	.	.	p.E542K	.	not profiled	.	.	.	.	.	.
P13973	.	Euro	78	T1	2	1	0	.	0	.	13.8	0	alive	3	1.5	2	6	p.T199fs*10	.	.	.	.	.	.	.	.	not profiled	.	.	.	.	.	.
P13974	.	Euro	39	T1	3	1	0	.	0	.	9.8	0	alive	9	4.5	2	6	.	p.R213*	.	.	.	.	.	p.H1047R	.	not profiled	.	.	.	.	.	.
P13975	.	Euro	48	T1	2	1	0	.	0	.	11.9	0	alive	3	1.5	2	6	.	.	.	.	.	.	.	p.H1047R	.	not profiled	.	.	.	.	.	.
P13977	.	Euro	42	T2	3	1	0	.	1	.	10	1	death	4	2	2	4	p.I650fs*13	.	.	.	.	.	.	.	.	not profiled	.	.	.	.	.	.
P13978	.	Euro	51	T2	2	1	0	.	0	.	12.1	1	death	1	0.5	1	4	.	.	.	.	.	.	.	.	.	not profiled	.	.	.	.	.	.
P13982	.	Euro	66	T1	1	1	0	.	0	.	12.6	0	alive	1	0.5	1	4	.	.	.	.	.	.	.	p.H1047R	.	not profiled	.	.	.	.	.	.
P13983	.	Euro	47	T2	3	1	0	.	1	.	12.5	0	alive	2	1	2	3	.	.	.	.	.	.	.	.	.	not profiled	.	.	.	.	.	.
P13984	.	Euro	65	T3	2	1	0	.	1	.	2.2	1	death	14	7	3	1	p.V678fs*1	.	.	.	.	.	.	p.G1049R	.	not profiled	.	.	.	.	.	.
P13985	.	Euro	52	T1	2	1	0	.	1	.	11.3	0	alive	3	1.5	2	6	.	.	p.W197R	.	.	.	.	p.E542K	.	not profiled	.	.	.	.	.	.
P13988	.	Euro	67	T2	3	1	0	.	0	.	7.2	1	death	0	0	1	6	.	.	.	.	.	.	.	.	.	not profiled	.	.	.	.	.	.
P13989	.	Euro	40	T2	2	1	0	.	1	.	14.3	0	alive	2	1	2	1	p.A628fs*20	.	.	p.Y175C	.	.	.	.	.	not profiled	.	.	.	.	.	.
P13990	.	Euro	51	T1	2	1	0	.	1	.	12.2	0	alive	6	3	2	3	p.P620fs*11	p.G244C	.	.	.	.	.	p.H1047R	.	not profiled	.	.	.	.	.	.
P13991	.	Euro	39	T1	2	1	0	.	0	.	13.8	0	alive	5	2.5	2	6	.	.	.	.	.	.	.	.	.	not profiled	.	.	.	.	.	.
P13992	.	Euro	60	T2	2	1	0	.	1	.	4.7	0	alive	5	2.5	2	1	p.P780fs*2	.	.	.	p.P409fs*99	.	.	.	.	not profiled	.	.	.	.	.	.
P13993	.	Euro	62	T1	2	1	0	.	1	.	4.2	1	death	7	3.5	2	4	p.Q23*	.	.	.	.	.	.	.	.	not profiled	.	.	.	.	.	.
P13997	.	Euro	50	T1	2	1	0	.	0	.	13.5	0	alive	11	5.5	3	1	p.Q610*	.	.	.	p.R313fs*40	.	.	p.Q546K	.	not profiled	.	.	.	.	.	.
P13998	.	Euro	66	T2	2	1	0	.	1	.	10.5	0	alive	10	5	3	1	p.Q23*	.	.	.	.	.	.	.	p.Y155C	not profiled	.	.	.	.	.	.
P13999	.	Euro	44	T2	2	1	0	.	1	.	3.3	1	death	11	5.5	3	3	p.E26fs*8	.	.	.	.	.	.	p.Q374K	.	not profiled	.	.	.	.	.	.
P14000	.	Euro	44	T1	2	1	0	.	0	.	11.1	0	alive	3	1.5	2	4	p.L21fs*30	.	.	.	.	.	.	.	.	not profiled	.	.	.	.	.	.
P14002	.	Euro	69	T1	2	1	0	.	0	.	3.7	1	death	9	4.5	2	4	.	.	p.Y271fs*1	.	.	.	.	p.H1047R	.	not profiled	.	.	.	.	.	.
P14004	.	Euro	47	T1	2	1	0	.	0	.	12.8	0	alive	6	3	2	6	p.L466fs*16	.	.	.	.	.	.	.	.	not profiled	.	.	.	.	.	.
P14005	.	Euro	69	T1	2	1	0	.	1	.	11	1	death	8	4	2	6	p.Q23*	.	p.W197fs*1	.	.	.	.	p.H1047R	.	not profiled	.	.	.	.	.	.
P14006	.	Euro	50	T3	2	1	0	.	1	.	13.7	0	alive	3	1.5	2	3	p.A567fs*21	.	.	.	.	.	.	.	.	not profiled	.	.	.	.	.	.
P14007	.	Euro	58	T2	2	1	0	.	1	.	10.8	0	alive	2	1	2	6	p.W213fs*4	.	.	.	.	.	.	p.H1047R	.	not profiled	.	.	.	.	.	.
P14008	.	Euro	54	T3	2	1	0	.	1	.	12.5	0	alive	2	1	2	4	.	.	.	.	.	.	.	.	.	not profiled	.	.	.	.	.	.
P14009	.	Euro	50	T1	2	1	0	.	0	.	12.7	0	alive	7	3.5	2	1	.	.	p.P497fs*136	.	.	.	.	p.G1049R	.	not profiled	.	.	.	.	.	.
P14012	.	Euro	64	T1	3	1	0	.	1	.	10.8	0	alive	3	1.5	2	6	p.D590fs*22	.	.	p.C268fs*1	.	.	.	.	.	not profiled	.	.	.	.	.	.
P14013	.	Euro	40	T1	2	1	0	.	1	.	12.1	0	alive	2	1	2	4	p.Q23*	.	.	.	.	.	.	.	.	not profiled	.	.	.	.	.	.
P14014	.	Euro	39	T1	3	1	0	.	0	.	9.1	0	alive	10	5	3	6	.	.	.	.	.	.	.	.	.	not profiled	.	.	.	.	p.Q2960*	.
P14015	.	Euro	43	T1	2	1	0	.	0	.	12	0	alive	13	6.5	3	1	p.N315fs*42	.	.	.	.	.	.	p.H1047R	.	not profiled	.	.	.	.	.	.
P14018	.	Euro	48	T2	1	1	0	.	1	.	11.2	0	alive	9	4.5	2	1	p.V475fs*8	.	p.H106fs*34	.	.	.	.	.	.	not profiled	.	.	.	.	.	.
P14021	.	Euro	47	T2	2	1	0	.	1	.	10.2	0	alive	2	1	2	6	.	.	.	.	.	.	.	.	.	not profiled	.	.	.	.	.	.
P14023	.	Euro	67	T3	2	1	0	.	1	.	2.5	1	death	4	2	2	1	.	.	.	.	.	.	.	.	.	not profiled	.	.	.	.	.	.
P14024	.	Euro	81	T2	1	1	0	.	.	.	6.8	0	alive	8	4	2	1	p.E596*	.	p.Q485*	p.S221L	.	p.V777L	.	p.H1047R	.	not profiled	.	.	.	.	.	.
P14025	.	Euro	56	T1	1	1	0	.	0	.	8.9	1	death	5	2.5	2	4	.	.	.	.	.	.	.	.	.	not profiled	.	.	.	.	.	.
P14026	.	Euro	39	T3	2	1	0	.	0	.	11.3	0	alive	6	3	2	1	p.L343P	.	.	.	.	.	.	p.H1047R	.	not profiled	.	.	.	.	.	.
P14029	.	Euro	47	T2	2	1	0	.	0	.	10.3	0	alive	6	3	2	1	.	.	.	.	.	.	.	p.H1047R	.	not profiled	.	.	.	.	.	.
P14034	.	Euro	41	T2	2	1	0	.	0	.	6.3	1	death	4	2	2	1	.	.	.	.	.	.	.	p.N345K	.	not profiled	.	.	.	.	.	.
P14038	.	Euro	62	T2	2	1	0	.	1	.	9.9	0	alive	5	2.5	2	3	p.Q23*	.	.	.	.	p.L755S	.	p.E545K	.	not profiled	.	.	.	.	.	.
P14039	.	Euro	36	T2	3	1	1	.	1	.	12.7	0	alive	4	2	2	3	.	.	.	.	.	.	.	.	.	not profiled	.	.	.	.	.	.
P14044	.	Euro	75	T2	2	1	0	.	1	.	9.9	0	alive	16	8	3	1	p.S111Y	.	.	p.F266L	.	.	.	p.P104L	.	not profiled	.	.	.	.	.	.
P14048	.	Euro	61	T2	2	1	0	.	1	.	14.1	1	death	2	1	2	6	p.E353fs*4	.	.	.	.	.	.	p.H1047L	.	not profiled	.	.	.	.	.	.
P14052	.	Euro	70	T2	2	1	0	.	0	.	6.4	0	alive	8	4	2	1	p.D254V	.	.	.	.	.	.	.	.	not profiled	.	.	.	.	.	.
P14053	.	Euro	55	T3	2	1	0	.	0	.	9.6	0	alive	9	4.5	2	1	p.Q346*	.	.	.	.	.	.	p.H1047R	.	not profiled	.	.	.	.	.	.
P14059	.	Euro	75	T2	2	1	0	.	1	.	0.4	1	death	10	5	3	6	p.G278*	.	p.D367fs*8	.	.	.	p.T355I	.	.	not profiled	.	.	.	.	.	.
P14060	.	Euro	57	T1	3	1	1	.	1	.	4.9	1	death	4	2	2	3	p.E482*	p.C277F	.	.	.	focal gain	.	.	.	not profiled	.	.	.	.	.	.
P14063	.	Euro	48	T2	2	1	0	.	0	.	10.5	0	alive	2	1	2	1	p.R779fs*5	.	p.Q249*	.	.	.	.	.	.	not profiled	.	.	.	.	.	.
P14064	.	Euro	68	T1	2	1	0	.	1	.	3.9	1	death	17	8.5	3	1	p.R492fs*44	p.E285K	p.H187R	.	.	.	.	p.H1047L	.	not profiled	.	.	.	.	p.I605fs*9	.
P14066	.	Euro	84	T1	2	1	0	.	0	.	9.6	0	alive	14	7	3	4	p.T522fs*35	.	p.A257P	.	.	.	.	.	.	not profiled	.	.	.	.	.	.
P14067	.	Euro	53	T1	2	2	0	.	1	.	9.3	1	death	4	2	2	6	p.I650fs*13	.	p.S396fs*10	.	.	gain	.	.	.	not profiled	.	.	.	.	.	.
P14068	.	Euro	48	T2	2	1	0	.	1	.	3.9	1	death	14	7	3	3	p.Y228fs*1	.	p.A676fs*196	.	.	.	.	p.H1047R	.	not profiled	.	.	.	.	.	.
P14069	.	Euro	46	T3	2	1	0	.	1	.	9.3	1	death	5	2.5	2	4	.	.	p.Y271fs*1	.	.	.	.	.	.	not profiled	.	.	.	.	.	.
P14074	.	Euro	53	T2	3	1	0	.	0	.	5.4	1	death	7	3.5	2	4	p.R63*	.	.	.	.	p.L869R	.	p.N345K	.	not profiled	.	.	.	.	.	.
P14076	.	Euro	67	T2	2	1	0	.	0	.	12	0	alive	17	8.5	3	4	p.W4*	.	.	p.S369F	.	.	.	p.E545K	.	not profiled	.	.	.	.	.	.
P14084	.	Euro	44	T1	2	1	0	.	1	.	9.9	0	alive	10	5	3	1	p.T820fs*2	.	p.P188fs*40	.	.	.	.	p.M1004I	.	not profiled	.	.	.	.	p.R2892fs*14	.
P14086	.	Euro	37	T2	2	1	0	.	1	.	5.2	0	alive	2	1	2	6	p.Q23*	.	.	.	.	.	.	p.H1047R	.	not profiled	.	.	.	.	.	.
P14087	.	Euro	67	T2	3	1	0	.	1	.	3.8	1	death	6	3	2	3	.	.	.	.	.	.	.	.	.	not profiled	.	.	.	.	.	.
P14089	.	Euro	65	T3	2	1	0	.	1	.	4.5	0	alive	9	4.5	2	4	p.G540fs*8	.	.	.	p.N352fs*4	.	.	.	.	not profiled	.	.	.	.	.	.
P14092	.	Euro	37	T3	2	1	0	.	1	.	8.1	1	death	9	4.5	2	3	p.E841*	.	.	p.I176M	p.P409fs*99	.	.	p.E545K	.	not profiled	.	.	.	.	.	.
P14093	.	Euro	49	T1	3	1	0	.	0	.	5.7	1	death	5	2.5	2	4	.	p.S261fs*84	.	.	.	.	.	.	.	not profiled	.	.	.	.	.	.
P14094	.	Euro	64	T2	3	1	1	.	1	.	4.5	1	death	4	2	2	3	p.W526*	.	.	.	.	.	.	p.H1047R	.	not profiled	.	.	.	.	.	.
P14095	.	Euro	61	T1	2	1	0	.	0	.	10	0	alive	3	1.5	2	1	p.N613fs*4	.	.	.	.	.	.	.	.	not profiled	.	.	.	.	.	.
P14099	.	Euro	40	T2	3	0	1	.	1	.	0.2	1	death	8	4	2	3	.	.	.	.	.	.	.	.	.	not profiled	.	.	.	.	.	.
P14100	.	Euro	53	T1	1	1	0	.	0	.	8.5	0	alive	10	5	3	6	p.P312fs*40	.	p.A53fs*31	.	.	.	.	p.E542K	.	not profiled	.	.	.	.	.	.
P14101	.	Euro	49	T1	3	1	0	.	1	.	8.8	0	alive	4	2	2	1	.	.	.	.	.	.	.	p.E81K	.	not profiled	.	.	.	.	.	.
P14105	.	Euro	64	T1	1	1	0	.	0	.	9.3	0	alive	6	3	2	4	.	.	.	.	.	.	.	.	.	not profiled	.	.	.	.	.	.
P14106	.	Euro	56	T2	2	1	0	.	1	.	2.5	1	death	6	3	2	1	p.Q610fs*3	.	p.V674fs*210	.	.	.	.	.	.	not profiled	.	.	.	.	.	.
P14107	.	Euro	75	T3	3	1	0	.	1	.	4.6	0	alive	10	5	3	4	p.Q255fs*3	p.Y220S	.	.	.	.	.	.	.	not profiled	.	.	.	.	.	.
P14110	.	Euro	61	T2	2	1	0	.	1	.	7.6	0	alive	10	5	3	6	p.P126fs*89	.	.	.	.	.	p.E928G	.	.	not profiled	.	.	.	.	.	.
P14111	.	Euro	63	T1	3	1	0	.	1	.	8.5	0	alive	0	0	1	6	.	.	.	.	.	broad gain	.	.	.	not profiled	.	.	.	.	.	.
P14112	.	Euro	61	T1	3	1	0	.	0	.	10.7	0	alive	6	3	2	3	p.P164fs*3	.	.	.	.	p.S310F	.	.	.	not profiled	.	.	.	.	.	.
P14113	.	Euro	41	T1	2	1	0	.	0	.	10	0	alive	7	3.5	2	6	.	.	.	.	p.A395fs*112	.	.	.	.	not profiled	.	.	.	.	.	.
P14114	.	Euro	69	T2	2	1	0	.	0	.	10.3	0	alive	5	2.5	2	4	p.S236*	.	.	.	.	gain	.	p.H1047R	.	not profiled	.	.	.	.	.	.
P14115	.	Euro	71	T1	3	1	0	.	1	.	9.9	0	alive	6	3	2	6	.	.	.	.	.	.	.	p.E545K	.	not profiled	.	.	.	.	.	.
P14119	.	Euro	87	T2	2	1	1	.	1	.	3.5	0	alive	11	5.5	3	1	p.R74*	.	p.S80fs*31	.	.	.	.	.	.	not profiled	.	.	.	.	.	.
P14122	.	Euro	44	T1	2	1	0	.	0	.	9.9	0	alive	5	2.5	2	3	p.E336D	.	.	.	.	.	.	.	.	not profiled	.	.	.	.	.	.
P14123	.	Euro	56	T2	2	1	0	.	0	.	9.9	0	alive	7	3.5	2	1	.	p.S149Y	.	.	.	.	.	.	.	not profiled	.	.	.	.	.	.
P14124	.	Euro	53	T1	2	1	0	.	1	.	1.4	1	death	4	2	2	1	p.Q641*	.	.	.	.	.	.	p.H1047R	.	not profiled	.	.	.	.	.	.
P14125	.	Euro	56	T1	2	1	0	.	1	.	9.6	0	alive	5	2.5	2	1	p.E273*	.	.	.	.	.	.	p.H1047R	.	not profiled	.	.	.	.	.	.
P14127	.	Euro	42	T2	2	1	0	.	1	.	8.9	1	death	2	1	2	1	p.V574fs*14	.	.	.	.	.	.	.	.	not profiled	.	.	.	.	.	.
P14128	.	Euro	50	T2	2	1	0	.	1	.	8.6	0	alive	4	2	2	1	p.F601fs*3	.	.	.	.	.	.	p.E545K	.	not profiled	.	.	.	.	.	.
P14129	.	Euro	65	T1	2	1	0	.	1	.	7.8	0	alive	5	2.5	2	1	p.W20fs*36	.	.	.	.	.	.	p.H1047L	.	not profiled	.	.	.	.	.	.
P14130	.	Euro	32	T1	3	1	0	.	1	.	9.6	0	alive	5	2.5	2	3	.	p.R306*	.	.	.	.	.	p.C420R	.	not profiled	.	.	.	.	.	.
P14131	.	Euro	54	T1	2	1	0	.	0	.	9	0	alive	4	2	2	1	p.Q95*	.	.	.	.	.	.	.	.	not profiled	.	.	.	.	.	.
P14132	.	Euro	64	T1	2	1	0	.	0	.	11.4	1	death	3	1.5	2	6	.	.	.	.	.	.	.	p.H1047R	.	not profiled	.	.	.	.	.	.
P14133	.	Euro	37	T1	2	1	0	.	1	.	7.6	0	alive	3	1.5	2	6	.	.	.	.	.	.	.	.	.	not profiled	.	.	.	.	.	.
P14134	.	Euro	67	T1	2	1	0	.	1	.	10.4	0	alive	3	1.5	2	6	p.I650fs*13	.	.	.	.	.	.	.	.	not profiled	.	.	.	.	.	.
P14135	.	Euro	47	T2	3	2	0	.	1	.	8.8	0	alive	6	3	2	3	p.Q23*	.	.	.	.	p.L755S	.	p.H1047R	.	not profiled	.	.	.	.	.	.
P14136	.	Euro	44	T1	2	1	0	.	0	.	10.3	0	alive	6	3	2	1	.	.	.	.	.	.	.	p.H1047R	.	not profiled	.	.	.	.	.	.
P14137	.	Euro	48	T1	3	2	0	.	1	.	2.2	1	death	11	5.5	3	4	p.G278*	.	.	.	.	.	.	.	.	not profiled	.	.	.	.	.	.
P14138	.	Euro	41	T2	2	1	0	.	1	.	10.7	1	death	3	1.5	2	1	p.H122fs*93	.	.	.	.	.	.	p.N345K	.	not profiled	.	.	.	.	.	.
P14143	.	Euro	51	T2	2	1	0	.	0	.	9.5	0	alive	24	12	4	1	p.P127fs*41	.	.	.	.	.	.	p.C420R	.	not profiled	.	.	.	.	.	.
P14145	.	Euro	67	T2	2	1	0	.	0	.	5.9	0	alive	6	3	2	3	.	.	.	.	.	.	.	.	.	not profiled	.	.	.	.	.	.
P14148	.	Euro	60	T2	2	1	0	.	0	.	8.9	0	alive	2	1	2	6	p.E388*	.	.	.	.	.	.	.	.	not profiled	.	.	.	.	.	.
P14149	.	Euro	57	T1	1	1	0	.	0	.	9.2	0	alive	4	2	2	6	p.P3fs*32	.	.	.	.	.	p.Q809R	p.N345K	.	not profiled	.	.	.	.	.	.
P14152	.	Euro	54	T1	2	1	1	.	0	.	9.9	0	alive	6	3	2	6	.	.	.	.	.	.	.	.	.	not profiled	.	.	.	.	.	.
P14153	.	Euro	42	T1	2	1	0	.	0	.	4.6	1	death	2	1	2	3	.	.	.	.	.	.	.	p.K111N	.	not profiled	.	.	.	.	.	.
P14154	.	Euro	64	T1	2	1	0	.	0	.	8.7	0	alive	9	4.5	2	1	.	.	.	.	.	.	.	p.E545K	.	not profiled	.	.	.	.	.	.
P14155	.	Euro	71	T1	2	1	0	.	0	.	10.9	0	alive	2	1	2	4	.	.	.	.	.	.	.	.	.	not profiled	.	.	.	.	.	.
P14156	.	Euro	37	T3	2	1	0	.	1	.	10.6	0	alive	5	2.5	2	1	p.N666fs*13	.	.	.	.	.	.	p.H1047R	.	not profiled	.	.	.	.	.	.
P14158	.	Euro	59	T1	2	1	0	.	1	.	9.9	0	alive	4	2	2	4	p.Q699*	.	.	.	.	.	.	p.H1047R	.	not profiled	.	.	.	.	.	.
P14159	.	Euro	64	T1	2	1	0	.	0	.	8.8	0	alive	13	6.5	3	1	p.R733fs*36	.	.	.	.	.	.	p.H1047R	.	not profiled	.	.	.	.	.	.
P14160	.	Euro	81	T2	2	1	0	.	1	.	1	0	alive	14	7	3	6	.	p.S241F	.	.	.	.	.	p.E545K	.	not profiled	.	.	.	.	.	.
P14161	.	Euro	43	T1	2	1	0	.	1	.	7.4	0	alive	7	3.5	2	1	p.Y827fs*19	.	.	.	.	.	.	p.E542K	.	not profiled	.	.	.	.	.	.
P14162	.	Euro	56	T2	2	1	0	.	1	.	9.8	0	alive	1	0.5	1	3	.	p.R337C	.	.	.	.	.	.	.	not profiled	.	.	.	.	.	.
P14163	.	Euro	48	T1	2	1	0	.	0	.	10.4	0	alive	6	3	2	1	p.W156*	.	.	.	.	.	.	.	.	not profiled	.	.	.	.	.	.
P14164	.	Euro	48	T1	2	1	0	.	0	.	8.2	0	alive	7	3.5	2	1	p.Q346*	.	p.H166fs*4	.	.	.	.	.	p.N228S	not profiled	.	.	.	.	.	.
P14165	.	Euro	60	T1	2	1	0	.	0	.	8.9	0	alive	9	4.5	2	1	.	.	.	.	.	.	.	p.H1047R	.	not profiled	.	.	.	.	.	.
P14166	.	Euro	55	T2	2	1	0	.	1	.	1.4	1	death	4	2	2	4	.	.	.	.	.	.	.	.	.	not profiled	.	.	.	.	.	.
P14167	.	Euro	66	T2	2	1	0	.	1	.	8.1	0	alive	8	4	2	1	p.E604*	.	.	.	.	.	.	p.H1047R	.	not profiled	.	.	.	.	.	.
P14168	.	Euro	47	T2	3	1	0	.	1	.	3.3	1	death	11	5.5	3	3	p.D549N	p.D393fs*78	.	.	.	.	.	.	.	not profiled	.	.	.	.	.	.
P14174	.	Euro	45	T1	3	1	0	.	0	.	10.2	0	alive	13	6.5	3	3	p.D244fs*5	.	.	.	.	.	.	p.H1047R	.	not profiled	.	.	.		p.S1741fs*35	.
P14178	.	Euro	69	T1	2	1	0	.	0	.	8.7	0	alive	6	3	2	5	p.P429fs*2	.	.	.	.	.	.	p.E545K	.	not profiled	.	.	.	.	.	.
P14179	.	Euro	73	T3	2	1	0	.	1	.	2.8	1	death	9	4.5	2	3	p.E265*	.	.	p.Y259C	.	.	.	p.H1047R	.	not profiled	.	.	.	.	.	.
P14182	.	Euro	49	T2	2	1	0	.	0	.	9.1	0	alive	21	10.5	4	4	p.Q641*	.	.	.	p.M294K	.	.	p.E545K	.	not profiled	.	.	.	.	.	p.Q1240*
P14186	.	Euro	73	T1	2	1	0	.	0	.	10	0	alive	8	4	2	4	.	.	p.W197R	.	.	.	.	.	.	not profiled	.	.	.	.	.	.
P14188	.	Euro	52	T1	2	1	0	.	0	.	7.8	0	alive	7	3.5	2	3	p.T217fs*6	.	p.S371fs*261	.	.	p.V777L	.	.	.	not profiled	.	.	.	.	.	.
P14190	.	Euro	46	T1	2	1	0	.	1	.	9	0	alive	4	2	2	3	.	.	.	.	.	.	.	p.H1047R	.	not profiled	.	p.Q1889R	.	.	.	.
P14196	.	Euro	40	T3	2	1	0	.	1	.	9.6	0	alive	8	4	2	4	.	.	.	.	.	.	.	p.H1047R	.	not profiled	.	.	.	.	.	.
P14197	.	Euro	58	T1	2	1	0	.	0	.	7.6	0	alive	6	3	2	5	p.S543fs*3	.	.	.	.	.	.	p.K111E	.	not profiled	.	.	.	.	.	.
P14198	.	Euro	70	T2	2	1	0	.	0	.	1.3	1	death	8	4	2	4	p.T115fs*53	.	p.V124G	.	.	focal gain	.	.	.	not profiled	.	.	.	.	.	.
P14199	.	Euro	50	T2	2	1	0	.	0	.	8.9	0	alive	4	2	2	6	.	.	.	.	.	.	.	p.C420R	.	not profiled	.	.	.	.	.	.
P14202	.	Euro	40	T2	2	1	0	.	1	.	6.8	1	death	8	4	2	5	p.C163fs*1	.	.	.	.	.	.	p.H1047R	.	not profiled	.	.	.	.	.	.
P14203	.	Euro	40	T3	2	1	0	.	1	.	6.4	0	alive	4	2	2	5	.	.	.	.	.	.	.	p.H1047L	.	not profiled	.	.	.	.	.	.
P14209	.	Euro	52	T2	3	1	1	.	1	.	1.4	1	death	4	2	2	4	.	p.Y163C	p.Y284F	.	.	focal gain	.	.	.	not profiled	.	.	.	.	.	.
P14214	.	Euro	46	T2	2	1	0	.	1	.	5.7	0	alive	4	2	2	1	p.S236*	.	.	.	.	.	.	p.E545K	.	not profiled	.	.	.	.	.	.
P14220	.	Euro	56	T1	2	1	0	.	1	.	6.1	0	alive	7	3.5	2	1	p.L731fs*38	.	.	.	.	.	.	.	.	not profiled	.	.	.	.	.	.
P14224	.	Euro	50	T2	3	1	0	.	1	.	8.6	1	death	9	4.5	2	4	p.L355fs*13	.	.	.	.	.	.	.	.	not profiled	.	.	.	.	.	.
P14225	.	Euro	47	T1	2	1	0	.	1	.	6.7	0	alive	10	5	3	5	p.A347fs*3	.	.	.	.	.	.	.	.	not profiled	.	.	.	.	.	.
P14227	.	Euro	47	T2	3	1	0	.	0	.	6.3	1	death	5	2.5	2	4	p.A692fs*5	.	.	.	.	focal gain	.	.	.	not profiled	.	.	.	.	.	.
P14228	.	Euro	54	T1	1	1	0	.	1	.	6.6	0	alive	4	2	2	1	.	.	.	.	.	.	.	p.H1047R	.	not profiled	.	.	.	.	.	.
P14230	.	Euro	37	T2	1	1	0	.	1	.	8.5	0	alive	5	2.5	2	1	.	.	.	.	.	.	.	.	.	not profiled	.	.	.	.	.	.
P14232	.	Euro	44	T2	2	1	0	.	1	.	8.5	0	alive	4	2	2	1	p.D349Y	.	.	.	.	.	.	p.K111E	.	not profiled	.	.	.	.	.	.
P14233	.	Euro	44	T2	1	1	0	.	0	.	8.6	0	alive	7	3.5	2	1	p.S847fs*13	.	.	.	.	.	.	p.E545K	.	not profiled	.	.	.	.	.	.
P14234	.	Euro	48	T1	3	1	0	.	1	.	8	0	alive	5	2.5	2	6	.	.	.	.	p.M401fs*106	.	.	.	.	not profiled	.	.	.	.	.	.
P14235	.	Euro	42	T2	3	1	0	.	1	.	8.6	1	death	8	4	2	6	p.Y753fs*4	.	.	.	.	.	.	p.C420R	.	not profiled	.	.	.	.	.	.
P14236	.	Euro	59	T3	2	1	0	.	1	.	3.5	1	death	10	5	3	1	.	.	.	.	p.K347fs*6	.	.	.	.	not profiled	.	.	.	.	.	.
P14237	.	Euro	65	T3	2	1	0	.	1	.	0.3	1	death	0	0	1	3	.	.	.	.	.	.	.	.	.	not profiled	.	.	.	.	.	.
P14238	.	Euro	67	T2	2	1	0	.	.	.	2.4	1	death	7	3.5	2	1	p.R43fs*13	p.R110P	.	.	.	.	.	.	.	not profiled	.	.	.	.	.	.
P14239	.	Euro	44	T2	2	1	0	.	1	.	5.6	0	alive	3	1.5	2	1	.	.	.	p.R261H	.	.	.	.	.	not profiled	.	.	.	.	.	.
P14240	.	Euro	49	T1	2	1	0	.	0	.	7.1	0	alive	4	2	2	1	.	.	.	p.N397fs*17	.	.	p.F219L	.	.	not profiled	.	.	.	.	.	.
P14241	.	Euro	49	T1	2	1	0	.	0	.	4.3	1	death	3	1.5	2	3	p.K314*	.	.	.	.	.	.	.	.	not profiled	.	.	.	.	.	.
P14242	.	Euro	85	T1	2	1	0	.	.	.	8.6	0	alive	11	5.5	3	3	p.L728fs*19	.	.	p.D249Y	.	.	.	p.C420R	.	not profiled	.	.	.	.	.	.
P14243	.	Euro	49	T2	2	1	0	.	1	.	8	0	alive	6	3	2	3	p.S327fs*24	.	.	.	.	.	.	.	.	not profiled	.	.	.	.	.	.
P14245	.	Euro	48	T1	2	1	0	.	0	.	8	0	alive	8	4	2	6	p.E388*	.	.	.	.	.	.	.	.	not profiled	.	.	.	.	.	.
P14246	.	Euro	71	T2	1	1	0	.	1	.	7.1	0	alive	5	2.5	2	1	p.Q136*	.	p.S244P	.	.	.	.	.	.	not profiled	.	.	.	.	.	.
P14247	.	Euro	65	T2	2	1	0	.	0	.	7.1	0	alive	9	4.5	2	1	p.C695fs*2	.	p.P264fs*18	.	.	.	.	p.H1047R	.	not profiled	.	.	.	.	.	.
P14248	.	Euro	42	T3	2	1	0	.	1	.	7.3	1	death	3	1.5	2	3	.	.	.	.	.	.	p.E928G	.	.	not profiled	.	.	.	.	.	.
P14249	.	Euro	61	T2	1	1	0	.	1	.	5.4	0	alive	3	1.5	2	1	p.L139*	.	.	.	.	.	.	p.H1047R	.	not profiled	.	.	.	.	.	.
P14251	.	Euro	57	T1	2	1	0	.	1	.	5.2	0	alive	6	3	2	1	p.R63*	.	.	.	.	.	.	.	p.V53E	not profiled	.	.	.	.	.	.
P14252	.	Euro	71	T1	3	1	0	.	0	.	1.7	1	death	8	4	2	4	p.A634fs*29	.	.	p.Q211_N216delQQRWQN	p.P155S	p.L755S	.	p.E545K	.	not profiled	.	.	.	.	.	.
P14254	.	Euro	50	T1	2	1	0	.	1	.	6.1	0	alive	6	3	2	1	.	.	.	.	.	.	.	p.E542K	.	not profiled	.	.	.	.	.	.
P14257	.	Euro	44	T2	2	1	0	.	1	.	5.2	0	alive	4	2	2	3	p.H632fs*30	.	.	.	.	.	.	.	p.F241S	not profiled	.	.	.	.	.	.
P14258	.	Euro	76	T2	3	2	0	.	1	.	4.7	0	alive	8	4	2	3	.	.	p.Q196fs*12	.	.	.	.	p.H1047R	.	not profiled	.	.	.	.	.	.
P14260	.	Euro	69	T1	3	1	0	.	0	.	6.9	0	alive	18	9	3	4	p.H45fs*5	p.K132N	.	p.D158N	.	p.L869R	.	.	.	not profiled	.	.	.	.	.	.
P14261	.	Euro	69	T2	1	1	0	.	0	.	6.2	0	alive	7	3.5	2	1	p.Y190fs*25	.	.	.	.	.	.	p.Q546K	.	not profiled	.	.	.	.	.	.
P14263	.	Euro	78	T1	2	1	0	.	.	.	4.6	0	alive	8	4	2	1	p.Y523*	.	p.L570fs*126	.	.	.	.	p.E542K	.	not profiled	.	.	.	.	.	.
P14264	.	Euro	40	T2	2	1	0	.	0	.	8.2	0	alive	10	5	3	3	.	.	.	.	.	.	.	.	.	not profiled	.	.	.	.	.	.
P14265	.	Euro	52	T1	1	1	0	.	1	.	2.5	1	death	9	4.5	2	3	p.W156*	.	.	.	.	p.L755S	.	p.H1047R	.	not profiled	.	.	.	.	.	.
P14266	.	Euro	65	T1	3	1	0	.	.	.	7.1	1	death	8	4	2	4	p.Y190fs*9	.	.	.	.	.	.	.	.	not profiled	.	.	.	.	.	.
P14268	.	Euro	69	T1	2	1	0	.	0	.	6.4	0	alive	11	5.5	3	3	p.Q23*	p.M133K	.	.	.	.	.	p.E970K	.	not profiled	.	.	.	.	.	p.M1014V
P14269	.	Euro	51	T1	3	1	0	.	1	.	3.8	1	death	4	2	2	4	p.M1L	p.D228H	.	.	.	.	.	.	.	not profiled	.	.	.	.	.	.
P14270	.	Euro	48	T2	2	1	0	.	1	.	7.2	0	alive	2	1	2	6	p.Q23*	.	.	.	p.Y345H	.	.	.	.	not profiled	.	.	.	.	.	.
P14271	.	Euro	62	T2	2	1	0	.	0	.	7.7	0	alive	3	1.5	2	1	p.E210fs*12	.	.	.	.	.	.	.	.	not profiled	.	.	.	.	.	.
P14272	.	Euro	55	T1	3	1	0	.	0	.	6.5	0	alive	6	3	2	3	p.P147fs*20	.	p.P264fs*18	.	.	.	.	.	.	not profiled	.	.	.	.	.	.
P14275	.	Euro	64	T1	2	1	0	.	0	.	6.2	0	alive	3	1.5	2	3	p.Q23*	.	.	.	.	.	.	.	.	not profiled	.	.	.	.	.	.
P14277	.	Euro	56	T2	1	1	0	.	1	.	5	0	alive	10	5	3	1	.	.	.	.	.	.	.	.	.	not profiled	.	.	.	.	.	.
P14278	.	Euro	48	T3	2	1	0	.	1	.	5.5	0	alive	3	1.5	2	1	p.M1V	.	.	.	.	.	.	.	.	not profiled	.	.	.	.	.	.
P14279	.	Euro	77	T1	1	1	0	.	0	.	4.9	0	alive	11	5.5	3	1	.	.	.	p.D226Y	.	.	.	p.H1047R	.	not profiled	.	.	.	.	.	.
P14280	.	Euro	43	T1	2	1	0	.	0	.	7.6	0	alive	4	2	2	1	p.Y642*	.	.	.	.	.	.	p.Q546P	.	not profiled	.	.	.	.	.	.
P14281	.	Euro	40	T1	.	1	0	.	0	.	6.3	0	alive	4	2	2	4	p.Y508fs*14	.	p.P264fs*18	.	.	.	.	p.N1044K	.	not profiled	.	.	.	.	.	.
P14282	.	Euro	76	T1	2	1	0	.	0	.	7.5	0	alive	8	4	2	1	p.E852fs*9	.	p.Q291*	.	.	.	p.E928G	.	.	not profiled	.	.	.	.	.	.
P14283	.	Euro	47	T1	2	1	0	.	1	.	6.8	0	alive	5	2.5	2	5	.	.	.	p.P428S	.	.	.	p.N345K	.	not profiled	.	.	.	.	.	.
P14284	.	Euro	46	T2	3	1	0	.	1	.	6.2	0	alive	5	2.5	2	3	p.V832fs*3	.	.	.	.	.	.	.	.	not profiled	.	.	.	.	.	.
P14285	.	Euro	69	T2	3	1	0	.	1	.	6.1	0	alive	5	2.5	2	4	p.T342fs*15	.	.	.	.	.	.	p.H1047R	.	not profiled	.	.	.	.	.	.
P14286	.	Euro	55	T1	2	1	0	.	0	.	6.2	0	alive	3	1.5	2	6	p.E243K	.	.	.	.	.	.	p.H1047R	.	not profiled	.	.	.	.	.	.
P14287	.	Euro	64	T3	3	2	0	.	1	.	1.6	1	death	11	5.5	3	1	p.R74*	.	.	p.H247Q	.	.	.	.	.	not profiled	.	.	.	.	.	.
P14290	.	Euro	49	T1	2	1	0	.	0	.	7	0	alive	4	2	2	6	.	.	.	.	.	.	.	.	.	not profiled	.	.	.	.	.	.
P14291	.	Euro	37	T1	2	1	0	.	.	.	7.1	0	alive	2	1	2	1	.	.	.	.	.	.	.	.	.	not profiled	.	.	.	.	.	.
P14293	.	Euro	69	T1	2	1	0	.	0	.	5.2	0	alive	38	19	4	6	p.E504*	p.D352N	p.Y265*	p.R261C	p.M294K	p.E1021K	.	p.E545K	.	not profiled	.	.	.	.	.	.
P14294	.	Euro	59	T1	1	1	0	.	1	.	4.6	1	death	5	2.5	2	4	.	.	.	.	.	.	.	p.H1047R	.	not profiled	.	.	.	.	.	.
P14295	.	Euro	64	T2	3	1	0	.	0	.	6.4	0	alive	4	2	2	3	p.Q23*	.	.	.	.	.	.	.	.	not profiled	.	.	.	.	.	.
P14296	.	Euro	62	T2	2	1	0	.	1	.	7.4	0	alive	8	4	2	5	.	.	p.E332fs*6	.	.	.	.	.	.	not profiled	.	.	.	.	.	.
P14297	.	Euro	64	T1	2	1	0	.	1	.	6.6	0	alive	10	5	3	4	.	.	p.E73fs*35	.	.	.	.	.	.	not profiled	.	.	.	.	.	.
P14298	.	Euro	55	T2	2	1	0	.	0	.	5.9	0	alive	7	3.5	2	1	p.I225T	.	.	.	.	.	.	p.H1047R	.	not profiled	.	.	.	.	.	.
P14299	.	Euro	47	T2	2	1	0	.	0	.	7.5	0	alive	7	3.5	2	1	p.K675fs*5	.	.	.	.	.	.	p.E545K	.	not profiled	.	.	.	.	.	.
P14300	.	Euro	49	T2	2	1	0	.	1	.	5.5	0	alive	4	2	2	5	p.Q16fs*18	.	.	.	.	.	.	.	p.T319fs*1	not profiled	.	.	.	.	.	.
P14301	.	Euro	44	T1	2	1	0	.	0	.	7.3	0	alive	6	3	2	3	p.L214P	.	.	.	p.L355fs*1	.	.	.	.	not profiled	.	.	.	.	.	.
P14302	.	Euro	54	T2	3	2	0	.	1	.	3.1	1	death	12	6	3	3	p.C603fs*1	p.Q331*	.	.	.	.	.	p.E545K	.	not profiled	.	.	.	.	.	.
P14303	.	Euro	64	T2	3	1	1	.	1	.	1.5	1	death	12	6	3	3	.	.	.	.	p.D381fs*2	.	.	.	.	not profiled	.	.	.	.	.	.
P14304	.	Euro	47	T2	2	1	0	.	1	.	5.4	0	alive	7	3.5	2	4	.	.	.	.	.	.	.	.	.	not profiled	.	.	.	.	.	.
P14305	.	Euro	73	T2	2	1	0	.	0	.	7.3	1	death	8	4	2	5	p.L343fs*2	.	.	.	p.R365T	.	.	p.H1047R	.	not profiled	.	.	.	.	.	.
P14307	.	Euro	66	T1	3	2	0	.	1	.	3.6	1	death	13	6.5	3	3	p.L769*	p.R342*	.	.	.	.	.	.	.	not profiled	.	.	.	.	.	.
P14308	.	Euro	39	T2	2	1	0	.	0	.	5.7	0	alive	6	3	2	3	.	.	.	.	.	.	.	.	p.I32fs*9	not profiled	.	.	.	.	.	.
P14311	.	Euro	63	T1	2	1	0	.	1	.	4.9	0	alive	9	4.5	2	5	p.Q23*	.	p.T606M	.	.	.	.	p.H1047R	.	not profiled	.	.	.	.	.	.
P14312	.	Euro	55	T1	2	1	0	.	0	.	7.2	0	alive	12	6	3	3	p.T115fs*53	.	.	.	.	.	p.D112N	p.E545K	p.G129E	not profiled	.	.	.	.	.	.
P14313	.	Euro	64	T1	3	1	1	.	1	.	1.7	1	death	6	3	2	4	p.P277fs*5	.	.	.	.	.	.	.	.	not profiled	.	.	.	.	.	.
P14314	.	Euro	44	T1	2	1	1	.	0	.	6.1	0	alive	5	2.5	2	5	.	.	.	p.R265C	.	.	.	.	.	not profiled	.	.	.	.	.	.
P14316	.	Euro	68	T1	2	1	0	.	0	.	5.4	0	alive	10	5	3	1	p.T199fs*10	.	.	.	.	.	.	.	.	not profiled	.	p.N2273H	.	.	.	.
P14317	.	Euro	51	T1	2	1	0	.	0	.	6.3	0	alive	7	3.5	2	5	.	.	.	.	.	.	.	p.G106R	.	not profiled	.	.	.	.	.	.
P14318	.	Euro	50	T1	1	1	0	.	0	.	5.1	0	alive	11	5.5	3	1	p.Q23*	.	p.L242F	.	.	.	.	.	.	not profiled	.	.	.	.	.	.
P14319	.	Euro	48	T2	2	1	0	.	0	.	5.7	0	alive	2	1	2	1	.	.	.	.	.	.	.	p.N345K	.	not profiled	.	.	.	.	.	.
P14320	.	Euro	67	T1	2	1	0	.	0	.	6	0	alive	8	4	2	1	p.Q677fs*11	.	.	.	.	.	.	.	p.I67R	not profiled	.	.	.	.	.	.
P14321	.	Euro	41	T1	1	1	0	.	1	.	7.1	0	alive	4	2	2	5	p.P159fs*56	.	.	.	.	.	.	p.Q546R	.	not profiled	.	.	.	.	.	.
P9857	.	Euro	52	T3	2	1	0	.	1	.	3.3	1	death	5	2.5	2	1	p.G577fs*7	.	.	.	p.T441fs*36	.	.	p.H1047R	.	not profiled	.	.	.	.	.	.
P9858	.	Euro	49	T1	2	2	0	.	0	.	15	0	alive	4	2	2	1	p.G421*	.	.	p.R261S	.	.	.	p.E542K	.	not profiled	.	.	.	.	.	.
P9859	.	Euro	58	T2	2	1	0	.	0	.	14.4	0	alive	3	1.5	2	4	p.D290fs*3	.	.	.	.	.	.	p.P539R	.	not profiled	.	.	.	.	.	.
P9860	.	Euro	47	T2	2	1	0	.	1	.	10.4	1	death	3	1.5	2	1	.	.	.	.	.	.	.	.	.	not profiled	.	.	.	.	.	.
P9862	.	Euro	62	T2	2	0	1	.	0	.	3.3	1	death	11	5.5	3	5	p.F516fs*6	.	.	p.I176M	.	focal gain	.	.	.	not profiled	.	.	.	.	.	.
P9863	.	Euro	67	T2	2	1	0	.	0	.	11	0	alive	3	1.5	2	6	p.N613fs*4	.	.	.	.	focal gain	.	.	.	not profiled	.	.	.	.	.	.
P9865	.	Euro	56	T2	2	1	0	.	0	.	1.2	1	death	3	1.5	2	1	.	.	.	.	.	gain	.	p.Q546P	.	not profiled	.	.	.		p.V3145fs*18	.
P9866	.	Euro	49	T1	2	1	0	.	0	.	9.1	0	alive	5	2.5	2	1	p.H632fs*31	.	.	p.Y243C	p.M401fs*106	.	.	p.H1047R	.	not profiled	.	.	.	.	.	.
P9867	.	Euro	40	T2	1	0	0	.	1	.	7.9	1	death	5	2.5	2	1	p.W20*	.	.	.	.	.	.	.	.	not profiled	.	p.T2266K	.	.	.	.
P9868	.	Euro	45	T2	3	1	.	.	1	.	16.4	0	alive	6	3	2	3	p.T253S	.	.	.	.	.	.	.	.	not profiled	.	.	.	.	.	.
P9869	.	Euro	69	T1	2	1	0	.	0	.	15.1	0	alive	6	3	2	4	p.R733fs*33	.	p.H166fs*42	.	.	.	.	.	.	not profiled	.	.	.	.	.	.
P9871	.	Euro	88	T2	1	1	0	.	0	.	7.7	0	alive	6	3	2	1	.	.	.	.	.	.	.	.	.	not profiled	.	.	.	.	.	.
P9872	.	Euro	76	T1	2	1	0	.	0	.	7.8	0	alive	7	3.5	2	4	p.V216fs*20	.	p.P298L	.	.	.	.	.	.	not profiled	.	.	.	.	.	.
P9873	.	Euro	59	T2	2	1	0	.	0	.	8.5	0	alive	4	2	2	1	.	.	.	.	.	.	.	p.E542K	.	not profiled	.	.	.	.	.	.
P9874	.	Euro	59	T2	2	1	0	.	0	.	9.1	0	alive	5	2.5	2	6	.	.	.	.	.	.	.	.	.	not profiled	.	.	.	.	.	.
P9875	.	Euro	59	T1	.	1	1	.	1	.	7.5	1	death	6	3	2	4	p.D590fs*1	.	.	.	.	.	.	.	.	not profiled	.	.	.	.	.	.
P9876	.	Euro	77	T1	2	1	0	.	0	.	8.2	0	alive	0	0	1	1	.	.	.	.	.	.	.	.	.	not profiled	.	.	.	.	.	.
P9879	.	Euro	87	T2	2	0	1	.	0	.	13.3	0	alive	11	5.5	3	1	p.E47*	.	.	.	.	focal gain	.	p.M1043I	.	not profiled	.	.	.	.	.	.
P9880	.	Euro	63	T2	2	1	0	.	1	.	1.1	1	death	2	1	2	1	p.Q610*	.	.	.	.	.	.	.	.	not profiled	.	.	.	.	.	.
P9881	.	Euro	68	T1	2	1	0	.	0	.	15.3	0	alive	1	0.5	1	3	.	.	.	.	.	.	.	.	.	not profiled	.	.	.	.	.	.
P9883	.	Euro	50	T1	2	1	0	.	1	.	9.4	0	alive	6	3	2	3	.	.	.	.	.	.	.	p.H1047R	p.D326fs*1	not profiled	.	.	.	.	.	.
P9884	.	Euro	45	T1	2	1	0	.	0	.	9.3	0	alive	4	2	2	5	p.T599fs*6	.	.	.	.	.	.	.	p.R233*	not profiled	.	.	.	.	.	.
P9885	.	Euro	61	T2	2	1	0	.	0	.	8.8	0	alive	6	3	2	1	p.R598*	.	.	.	.	.	.	p.N345K	.	not profiled	.	.	.	.	.	.
P9886	.	Euro	36	T1	2	1	0	.	1	.	7.9	1	death	7	3.5	2	1	p.P127fs*41	.	.	p.G251fs*66	.	.	.	p.E542K	.	not profiled	.	.	.	.	.	.
P9888	.	Euro	34	T2	2	1	0	.	1	.	10.9	1	death	5	2.5	2	5	p.N405fs*14	.	.	.	.	.	.	.	.	not profiled	.	.	.	.	.	.
P9889	.	Euro	40	T3	1	1	0	.	1	.	5.5	1	death	7	3.5	2	1	.	.	.	p.D249Y	.	.	.	.	.	not profiled	.	.	.	.	.	.
P9890	.	Euro	66	T3	2	1	1	.	1	.	3	1	death	7	3.5	2	1	p.N238D	.	.	.	.	.	.	.	.	not profiled	.	.	.	.	.	.
P9892	.	Euro	66	T2	1	0	0	.	0	.	10.9	0	alive	7	3.5	2	1	p.R74fs*20	.	.	.	.	.	.	.	.	not profiled	.	.	.	.	.	.
P9893	.	Euro	55	T2	2	1	0	.	0	.	16.1	0	alive	10	5	3	1	p.Q23*	.	.	.	.	.	.	p.H1047R	.	not profiled	.	.	.	.	.	.
P9894	.	Euro	52	T2	2	1	0	.	0	.	6.2	0	alive	4	2	2	1	.	.	.	.	.	.	.	.	.	not profiled	.	.	.	.	.	.
P9895	.	Euro	74	T1	2	1	0	.	0	.	14	0	alive	4	2	2	1	p.Q511*	.	.	.	.	.	p.E928G	.	.	not profiled	.	.	.	.	.	.
P9896	.	Euro	69	T2	2	1	0	.	0	.	4.2	0	alive	11	5.5	3	1	p.Y523fs*1	p.E285K	.	.	.	.	.	p.E453K	.	not profiled	.	.	.	.	.	.
P9897	.	Euro	53	T2	1	1	0	.	1	.	10.2	0	alive	3	1.5	2	1	p.N144fs*71	.	.	.	.	.	.	p.H1047R	.	not profiled	.	.	.	.	.	.
P9898	.	Euro	58	T1	2	1	0	.	0	.	8.6	0	alive	1	0.5	1	1	.	.	.	.	.	.	.	.	.	not profiled	.	.	.	.	.	.
P9899	.	Euro	52	T1	2	1	0	.	1	.	9.1	1	death	3	1.5	2	1	p.H122fs*43	.	.	.	.	.	.	p.H1047R	.	not profiled	.	.	.	.	.	.
P9900	.	Euro	59	T1	2	1	1	.	0	.	9.5	0	alive	4	2	2	1	p.Q95*	.	.	.	.	p.L869R	p.S846I	.	.	not profiled	.	.	.	.	.	.
P9901	.	Euro	70	T2	1	1	0	.	0	.	7.3	0	alive	13	6.5	3	1	p.G62fs*30	.	.	p.S250F	.	.	.	p.H1047R	.	not profiled	.	.	.	.	.	.
P9902	.	Euro	51	T1	2	1	0	.	0	.	1.5	0	alive	2	1	2	1	p.P429fs*2	.	.	.	.	.	.	p.N345K	.	not profiled	.	.	.	.	.	.
P9903	.	Euro	40	T3	3	1	0	.	1	.	4.6	0	alive	3	1.5	2	1	p.Q23*	.	.	.	.	.	.	p.H1047R	.	not profiled	.	.	.	.	.	.
P9905	.	Euro	79	T1	2	1	0	.	.	.	1.3	1	death	5	2.5	2	6	p.T522I	.	.	.	p.R367*	.	.	.	.	not profiled	.	.	.	.	.	.
P9906	.	Euro	57	T1	2	1	0	.	1	.	2	1	death	11	5.5	3	1	.	.	.	.	.	.	.	.	.	not profiled	.	.	.	.	p.Y2215fs*13	.
P9907	.	Euro	50	T3	2	1	0	.	1	.	14.9	0	alive	6	3	2	1	p.G716fs*32	.	.	.	.	.	.	.	.	not profiled	.	.	.	.	.	.
P9908	.	Euro	55	T1	2	1	0	.	0	.	4.4	1	death	2	1	2	1	.	.	.	.	.	.	.	p.H1047R	.	not profiled	.	.	.	.	.	.
P9909	.	Euro	51	T2	2	1	0	.	1	.	8.2	1	death	5	2.5	2	1	p.I206fs*3	.	.	.	.	.	.	.	.	not profiled	.	.	.	.	.	.
P9910	.	Euro	79	T2	2	1	0	.	0	.	5.5	0	alive	12	6	3	1	p.R696fs*51	.	.	p.F266L	.	.	.	p.E545K	.	not profiled	.	p.P1743T	.	.	.	.
P9912	.	Euro	49	T2	1	1	0	.	0	.	9.3	0	alive	2	1	2	1	.	.	.	p.D226H	.	.	.	.	.	not profiled	.	.	.	.	.	.
P9913	.	Euro	46	T1	2	1	0	.	0	.	9.1	0	alive	3	1.5	2	1	p.N591fs*6	.	p.Y271*	.	.	.	.	p.H1047R	.	not profiled	.	.	.	.	.	.
P9914	.	Euro	52	T2	2	1	0	.	0	.	8.4	0	alive	3	1.5	2	1	p.Q23*	.	.	.	.	.	.	.	.	not profiled	.	.	.	.	.	.
P9915	.	Euro	54	T1	2	1	0	.	1	.	8	0	alive	2	1	2	1	p.Q23*	.	.	.	.	.	.	p.N345K	.	not profiled	.	.	.	.	.	.
RL1001	.	RATHER	62	.	2	1	0	.	0		9.02396	0	alive	.	.	.	1	.	.	not profiled	not profiled	.	.	.	.	.	not profiled	.	.	.	.	.	.
RL1004	.	RATHER	80	.	2	1	0	.	0		0.388775	1	dead-disease-specific	.	.	.	1	.	.	not profiled	not profiled	.	.	.	mut	.	not profiled	.	.	.	.	.	.
RL1007	.	RATHER	62	.	2	1	0	.	0		7.95072	0	alive	.	.	.	1	.	.	not profiled	not profiled	mut	.	.	mut	.	not profiled	.	.	.	.	.	.
RL1008	.	RATHER	58	.	2	1	0	.	0		7.80287	1	dead-not-disease-specific	.	.	.	1	mut	.	not profiled	not profiled	.	.	.	mut	.	not profiled	.	.	.	.	.	.
RL1009	.	RATHER	72	.	2	1	0	.	0		3.5729	1	dead-disease-specific	.	.	.	3	.	.	not profiled	not profiled	.	.	.	.	.	not profiled	.	.	.	.	.	.
RL1014	.	RATHER	54	.	1	.	.	.	0		11.8439	0	alive	.	.	.	1	.	.	not profiled	not profiled	.	.	.	mut	.	not profiled	.	.	.	.	.	.
RL1016	.	RATHER	67	.	2	1	0	.	0		12.7556	0	alive	.	.	.	3	mut	.	not profiled	not profiled	.	.	.	.	.	not profiled	.	.	.	.	.	.
RL1017	.	RATHER	56	.	2	1	0	.	0		5.31691	0	alive	.	.	.	1	.	.	not profiled	not profiled	.	.	.	mut	.	not profiled	.	.	.	.	.	.
RL1020	.	RATHER	43	.	2	.	.	.	0		17.5003	0	alive	.	.	.	1	.	.	not profiled	not profiled	.	.	.	mut	.	not profiled	.	.	.	.	.	.
RL1021	.	RATHER	44	.	2	1	0	.	0		12.0958	0	alive	.	.	.	3	.	.	not profiled	not profiled	.	.	.	.	.	not profiled	.	.	.	.	.	.
RL1022	.	RATHER	59	.	2	1	0	.	0		7.23888	1	dead-disease-specific	.	.	.	1	mut	.	not profiled	not profiled	.	.	.	mut	.	not profiled	.	.	.	.	.	.
RL1023	.	RATHER	46	.	2	1	0	.	1	.	10.9897	1	dead-not-disease-specific	.	.	.	1	.	.	not profiled	not profiled	.	.	.	.	.	not profiled	.	.	.	.	.	.
RL1025	.	RATHER	60	.	2	2	0	.	0		7.8768	0	alive	.	.	.	6	.	.	not profiled	not profiled	.	.	.	.	.	not profiled	.	.	.	.	.	.
RL1028	.	RATHER	49	.	2	1	0	.	0		10.089	0	alive	.	.	.	3	mut	.	not profiled	not profiled	.	mut	.	.	.	not profiled	.	.	.	.	.	.
RL1032	.	RATHER	52	.	2	1	0	.	0		5.4538	0	alive	.	.	.	3	mut	.	not profiled	not profiled	.	.	.	.	mut	not profiled	.	.	.	.	.	.
RL1033	.	RATHER	63	.	2	1	0	.	0		1.3963	1	dead-not-disease-specific	.	.	.	3	mut	.	not profiled	not profiled	.	.	.	.	mut	not profiled	.	.	.	.	.	.
RL1034	.	RATHER	60	.	2	1	0	.	0		6.8501	0	alive	.	.	.	4	.	.	not profiled	not profiled	.	.	.	.	.	not profiled	.	.	.	.	.	.
RL1037	.	RATHER	76	.	2	1	0	.	0		6.44216	1	dead-not-disease-specific	.	.	.	3	.	.	not profiled	not profiled	.	.	.	.	.	not profiled	.	.	.	.	.	.
RL1038	.	RATHER	54	.	2	1	0	.	0		1.27036	1	dead-disease-specific	.	.	.	1	mut	.	not profiled	not profiled	.	.	.	.	.	not profiled	.	.	.	.	.	.
RL1043	.	RATHER	74	.	2	1	0	.	0		9.97399	0	alive	.	.	.	1	.	.	not profiled	not profiled	.	.	.	.	.	not profiled	.	.	.	.	.	.
RL1044	.	RATHER	53	.	2	1	.	.	0		10.3546	0	alive	.	.	.	1	.	.	not profiled	not profiled	.	.	.	mut	.	not profiled	.	.	.	.	.	.
RL1047	.	RATHER	64	.	2	1	0	.	0		0.750171	0	alive	.	.	.	3	.	.	not profiled	not profiled	.	.	.	.	.	not profiled	.	.	.	.	.	.
RL1048	.	RATHER	42	.	1	1	0	.	0		12.5311	0	alive	.	.	.	1	.	.	not profiled	not profiled	.	.	.	.	.	not profiled	.	.	.	.	.	.
RL1052	.	RATHER	64	.	2	1	0	.	0		15.2936	0	alive	.	.	.	3	.	.	not profiled	not profiled	.	.	.	mut	.	not profiled	.	.	.	.	mut	.
RL1054	.	RATHER	67	.	2	1	1	.	0		9.68378	1	dead-disease-specific	.	.	.	1	mut	.	not profiled	not profiled	.	mut	.	.	.	not profiled	.	.	.	.	.	.
RL1055	.	RATHER	.	.	.	.		.	0	.	.	.	.	.	.	.	.	mut	.	not profiled	not profiled	.	.	.	mut	.	not profiled	.	.	.	.	.	.
RL1056	.	RATHER	62	.	2	1	0	.	0		13.6482	1	dead-not-disease-specific	.	.	.	1	mut	.	not profiled	not profiled	.	.	.	mut	.	not profiled	.	.	.	.	.	.
RL1057	.	RATHER	66	.	1	1	0	.	0		18.4175	1	dead-disease-specific	.	.	.	.	.	.	not profiled	not profiled	.	.	.	mut	.	not profiled	.	.	.	.	.	.
RL1058	.	RATHER	59	.	2	1	0	.	0		13.1499	1	dead-disease-specific	.	.	.	3	.	.	not profiled	not profiled	.	.	.	.	.	not profiled	.	.	.	.	.	.
RL1061	.	RATHER	55	.	2	1	0	.	0		12.8241	0	alive	.	.	.	1	.	.	not profiled	not profiled	.	.	.	.	.	not profiled	.	.	.	.	.	.
RL1062	.	RATHER	48	.	.	.		.	0		6.85832	1	dead-not-disease-specific	.	.	.	.	mut	.	not profiled	not profiled	.	.	.	mut	.	not profiled	.	.	.	.	.	.
RL1063	.	RATHER	56	.	2	1	0	.	0		10.1821	0	alive	.	.	.	1	.	.	not profiled	not profiled	.	.	.	mut	.	not profiled	.	.	.	.	.	.
RL1064	.	RATHER	62	.	.	1	0	.	0		9.97947	0	alive	.	.	.	6	.	.	not profiled	not profiled	.	.	.	mut	.	not profiled	.	.	.	.	.	.
RL1066	.	RATHER	57	.	2	1	.	.	0		9.20192	0	alive	.	.	.	3	mut	.	not profiled	not profiled	.	.	.	mut	.	not profiled	.	.	.	.	.	.
RL1067	.	RATHER	71	.	2	0	0	.	1	.	0.810404	1	dead-disease-specific	.	.	.	1	.	mut	not profiled	not profiled	.	.	.	.	.	not profiled	.	.	.	.	.	.
RL1070	.	RATHER	68	.	2	.	.	.	0		7.61123	0	alive	.	.	.	1	mut	.	not profiled	not profiled	.	.	.	mut	.	not profiled	.	.	.	.	.	.
RL1073	.	RATHER	51	.	2	1	0	.	0		4.43806	0	alive	.	.	.	4	.	.	not profiled	not profiled	.	mut	.	mut	.	not profiled	.	.	.	.	.	.
RL1074	.	RATHER	40	.	2	1	0	.	0		8.12868	0	alive	.	.	.	1	.	.	not profiled	not profiled	.	.	.	mut	.	not profiled	.	.	.	.	.	.
RL1075	.	RATHER	60	.	2	1	0	.	0		6.28611	0	alive	.	.	.	1	mut	.	not profiled	not profiled	.	.	.	.	.	not profiled	.	.	.	.	.	.
RL1077	.	RATHER	42	.	2	1	0	.	1	.	6.80356	0	alive	.	.	.	3	mut	.	not profiled	not profiled	.	.	.	mut	.	not profiled	.	.	.	.	.	.
RL1078	.	RATHER	59	.	2	.	.	.	0		5.97947	0	alive	.	.	.	1	.	.	not profiled	not profiled	.	.	.	.	.	not profiled	.	.	.	.	mut	.
RL1079	.	RATHER	78	.	2	1	0	.	0		3.35387	0	alive	.	.	.	3	.	.	not profiled	not profiled	mut	.	.	.	.	not profiled	.	.	.	.	.	.
RL1080	.	RATHER	56	.	2	1	0	.	0		5.70294	0	alive	.	.	.	6	.	.	not profiled	not profiled	.	.	.	.	.	not profiled	.	.	.	.	.	.
RL1083	.	RATHER	63	.	3	1	0	.	0		6.05613	0	alive	.	.	.	1	mut	.	not profiled	not profiled	.	.	.	mut	.	not profiled	.	.	.	.	.	.
RL1084	.	RATHER	76	.	2	1	0	.	0		5.14442	0	alive	.	.	.	3	.	.	not profiled	not profiled	.	.	.	mut	.	not profiled	.	.	.	.	.	.
RL1085	.	RATHER	44	.	.	.	.	.	.		3.91513	1	dead-not-disease-specific	.	.	.	.	mut	.	not profiled	not profiled	.	.	.	.	.	not profiled	.	.	.	.	.	.
RL1086	.	RATHER	42	.	2	1	.	.	1	.	21.2923	0	alive	.	.	.	1	.	.	not profiled	not profiled	.	.	.	.	.	not profiled	.	.	.	.	.	.
RL1087	.	RATHER	46	.	2	1	0	.	1	.	9.295	1	dead-disease-specific	.	.	.	1	.	.	not profiled	not profiled	.	.	.	.	.	not profiled	.	.	.	.	.	.
RL1088	.	RATHER	42	.	2	1	0	.	1	.	18.7242	0	alive	.	.	.	1	.	.	not profiled	not profiled	.	.	.	mut	.	not profiled	.	.	.	.	.	.
RL1089	.	RATHER	50	.	2	.	0	.	1	.	11.2033	0	alive	.	.	.	1	.	mut	not profiled	not profiled	.	.	.	mut	.	not profiled	.	.	.	.	.	.
RL1090	.	RATHER	50	.	2	.	0	.	1	.	15.0335	0	alive	.	.	.	1	mut	.	not profiled	not profiled	.	.	.	.	.	not profiled	.	.	.	.	.	.
RL1094	.	RATHER	47	.	2	1	0	.	1	.	9.0705	0	alive	.	.	.	1	.	.	not profiled	not profiled	.	.	.	.	.	not profiled	.	.	.	.	.	.
RL1095	.	RATHER	48	.	2	1	0	.	1	.	9.80151	0	alive	.	.	.	3	mut	.	not profiled	not profiled	.	.	.	.	.	not profiled	.	.	.	.	.	.
RL1096	.	RATHER	51	.	2	1	0	.	0		10.8474	0	alive	.	.	.	1	mut	.	not profiled	not profiled	.	.	.	mut	.	not profiled	.	.	.	.	.	.
RL1098	.	RATHER	59	.	2	1	0	.	0		16.9227	0	alive	.	.	.	4	mut	.	not profiled	not profiled	.	mut	.	.	.	not profiled	.	.	.	.	.	.
RL1099	.	RATHER	44	.	2	1	0	.	0		22.1574	0	alive	.	.	.	1	.	.	not profiled	not profiled	.	.	.	.	.	not profiled	.	.	.	.	mut	.
RL1100	.	RATHER	64	.	2	1	0	.	0		5.19097	0	alive	.	.	.	1	mut	.	not profiled	not profiled	.	.	.	.	.	not profiled	.	.	.	.	.	.
RL1101	.	RATHER	84	.	2	1	0	.	1	.	6.38741	1	dead-disease-specific	.	.	.	4	mut	mut	not profiled	not profiled	.	.	.	mut	.	not profiled	.	.	.	.	.	.
RL1103	.	RATHER	41	.	2	.	0	.	.		7.88775	1	dead-disease-specific	.	.	.	1	mut	.	not profiled	not profiled	.	.	.	mut	.	not profiled	.	.	.	.	.	.
RL1104	.	RATHER	93	.	2	0	0	.	0		4.40794	1	dead-not-disease-specific	.	.	.	4	.	.	not profiled	not profiled	.	mut	.	.	.	not profiled	.	.	.	.	.	.
RL1105	.	RATHER	66	.	2	1	0	.	0		10.0233	0	alive	.	.	.	1	mut	.	not profiled	not profiled	.	.	.	.	.	not profiled	.	.	.	.	.	.
RL1106	.	RATHER	45	.	2	1	0	.	1	.	11.77	0	alive	.	.	.	1	mut	.	not profiled	not profiled	.	.	.	.	.	not profiled	.	.	.	.	.	mut
RL1107	.	RATHER	49	.	1	1	0	.	0		11.4716	0	alive	.	.	.	1	.	.	not profiled	not profiled	.	.	.	.	.	not profiled	.	.	.	.	.	.
RL1110	.	RATHER	59	.	2	.	.	.	1	.	19.0089	1	dead-disease-specific	.	.	.	3	mut	.	not profiled	not profiled	.	.	.	.	.	not profiled	.	.	.	.	.	.
RL1111	.	RATHER	65	.	2	1	0	.	0		14.9049	0	alive	.	.	.	1	mut	.	not profiled	not profiled	.	.	.	mut	.	not profiled	.	.	.	.	.	.
RL1112	.	RATHER	62	.	2	1	0	.	1	.	12.5147	0	alive	.	.	.	1	.	.	not profiled	not profiled	.	.	.	.	.	not profiled	.	.	.	.	.	.
RL1114	.	RATHER	69	.	2	.	0	.	1	.	9.44011	1	dead-not-disease-specific	.	.	.	.	.	.	not profiled	not profiled	.	.	.	.	.	not profiled	.	.	.	.	.	.
RL1116	.	RATHER	66	.	2	1	0	.	1	.	9.46475	0	alive	.	.	.	1	.	.	not profiled	not profiled	.	.	.	.	.	not profiled	.	.	.	.	.	.
RL1120	.	RATHER	72	.	2	1	0	.	1	.	9.07324	1	dead-not-disease-specific	.	.	.	1	.	.	not profiled	not profiled	.	.	.	.	.	not profiled	.	.	.	.	.	.
RL1121	.	RATHER	47	.	.	.		.	1	.	8.78029	1	dead-disease-specific	.	.	.	.	.	.	not profiled	not profiled	.	.	.	.	.	not profiled	.	.	.	.	.	.
RL1122	.	RATHER	56	.	2	1	0	.	0		7.41136	0	alive	.	.	.	6	.	.	not profiled	not profiled	.	.	.	.	.	not profiled	.	.	.	.	.	.
RL1123	.	RATHER	45	.	2	1	0	.	1	.	8.04654	0	alive	.	.	.	1	.	.	not profiled	not profiled	mut	.	.	.	.	not profiled	.	.	.	.	.	.
RL1124	.	RATHER	71	.	2	1	0	.	1	.	1.61807	1	dead-disease-specific	.	.	.	4	.	.	not profiled	not profiled	.	.	.	.	.	not profiled	.	mut	.	.	.	.
RL1126	.	RATHER	51	.	2	1	0	.	1	.	8.90349	0	alive	.	.	.	3	mut	.	not profiled	not profiled	.	.	.	.	.	not profiled	.	.	.	.	.	.
RL1127	.	RATHER	52	.	2	1	0	.	0		8.08761	0	alive	.	.	.	3	.	.	not profiled	not profiled	.	.	.	mut	.	not profiled	.	.	.	.	.	.
RL1129	.	RATHER	68	.	2	1	0	.	1	.	5.16632	0	alive	.	.	.	3	.	.	not profiled	not profiled	.	.	.	.	.	not profiled	.	.	.	.	.	.
RL1130	.	RATHER	59	.	2	.	0	.	0		8.12047	0	alive	.	.	.	1	.	.	not profiled	not profiled	.	.	.	.	.	not profiled	.	.	.	.	.	.
TCGA-D8-A3Z5-01	TCGA-D8-A3Z5	tcga_pan_can_atlas_2018	54	T2	2	.	.	.	1	33.3695	2.78079	0	0:LIVING	NA	.	.	1	.	.	.	.	.	.	.	.	.	F643Lfs*21	.	.	.	.	.	.
MB-0653	MB-0653	metabric	69.95	T2	3	2	0	Her2	1	24.8	2.06667	1	1:DECEASED	22	18.3333	4	.	R154Gfs*62	E285K	.	.	.	S609C	.	H1047L, E385K	Q245*	D114H	.	.	.	.	.	.
TCGA-GM-A3NW-01	TCGA-GM-A3NW	tcga_pan_can_atlas_2018	63	T2	2	.	.	LumA	0	110.497	9.20812	0	0:LIVING	52	1.04	2	1	.	.	.	.	.	.	.	N345H	.	.	V4L	.	.	AMP	.	.
MB-0472	MB-0472	metabric	59.34	T1	.	1	0	LumB	0	27.4	2.28333	0	0:LIVING	2	1.66667	2	.	.	.	.	.	Y344*	.	.	.	.	.	E17K	.	.	.	.	.
MB-0102	MB-0102	metabric	51.38	T2	2	1	0	LumB	1	140.767	11.7306	1	1:DECEASED	4	3.33333	2	3	Q23*	R175H	.	.	.	.	.	.	.	.	E17K	.	.	.	.	.
MB-5577	MB-5577	metabric	68.64	T3	3	2	0	claudin-low	1	55.4	4.61667	1	1:DECEASED	9	7.5	3	.	.	V216M	.	.	.	.	.	.	.	.	E17K	.	.	.	.	.
TCGA-D8-A1X8-01	TCGA-D8-A1X8	tcga_pan_can_atlas_2018	62	T1	2	.	.	LumA	1	25.7422	2.14518	0	0:LIVING	22	0.44	1	1	.	.	.	.	.	.	.	.	.	.	E17K	.	.	.	.	.
TCGA-E2-A107-01	TCGA-E2-A107	tcga_pan_can_atlas_2018	54	T3	3	.	.	LumA	1	34.4215	2.86846	0	0:LIVING	27	0.54	1	2	E336=	.	.	.	.	.	.	.	.	.	E17K	.	.	.	.	.
TCGA-WT-AB44-01	TCGA-WT-AB44	tcga_pan_can_atlas_2018	77	T1	2	.	.	LumA	0	29.0298	2.41915	0	0:LIVING	31	0.62	1	3	A289Tfs*6	.	F204S	.	.	.	.	.	.	.	E17K	.	.	.	.	.
TCGA-AC-A6IX-01	TCGA-AC-A6IX	tcga_pan_can_atlas_2018	49	T2	2	.	.	LumA	1	12.2629	1.02191	0	0:LIVING	48	0.96	2	1	N570Mfs*14	.	.	.	.	.	.	.	.	.	E17K	.	.	AMP	.	.
MTS-T0075	MTS-T0075	metabric	51	.	.	.	.	.	.	.	.	.	.	1	0.833333	1	.	T467Nfs*16	.	.	.	.	.	.	.	.	.	.	.	.	.	.	.
MTS-T0080	MTS-T0080	metabric	59	T1	2	.	.	.	0	.	.	.	.	1	0.833333	1	.	F205Yfs*3	.	.	.	.	.	.	.	.	.	.	.	.	.	.	.
MTS-T0135	MTS-T0135	metabric	59	.	2	1	.	.	.	.	.	.	.	1	0.833333	1	.	T115Nfs*53	.	.	not profiled	.	.	.	.	.	.	.	.	not profiled	not profiled	.	.
MTS-T0245	MTS-T0245	metabric	57.43	T1	3	1	.	.	0	.	.	.	.	1	0.833333	1	.	.	W53*	.	not profiled	.	.	.	.	.	.	.	.	not profiled	not profiled	.	.
MB-2556	MB-2556	metabric	62.59	T1	2	2	0	claudin-low	1	220.9	18.4083	1	1:DECEASED	1	0.833333	1	.	.	.	.	.	.	.	.	.	.	.	.	.	.	.	.	.
MB-0279	MB-0279	metabric	69.52	T2	1	1	0	claudin-low	0	192.267	16.0222	1	1:DECEASED	1	0.833333	1	4	.	.	.	.	.	.	.	.	R130Q	.	.	.	.	.	.	.
MB-0139	MB-0139	metabric	47.62	T2	2	1	0	LumA	1	109.2	9.1	0	0:LIVING	1	0.833333	1	1	.	.	.	.	.	.	.	H1047L	.	.	.	.	.	.	.	.
MB-0427	MB-0427	metabric	81.89	T2	2	1	0	LumA	1	116.1	9.675	0	0:LIVING	1	0.833333	1	1	F626Sfs*35	.	.	.	.	.	.	.	.	.	.	.	.	.	.	.
MB-6141	MB-6141	metabric	79.84	.	3	1	0	LumB	1	78.8667	6.57222	1	1:DECEASED	1	0.833333	1	.	.	.	.	.	.	.	.	.	.	.	.	.	.	.	.	.
MB-7216	MB-7216	metabric	79.23	T1	2	1	0	LumB	0	207.467	17.2889	1	1:DECEASED	1	0.833333	1	.	.	.	.	.	.	.	.	.	.	.	.	.	.	.	.	.
MB-5150	MB-5150	metabric	69.29	T1	2	1	0	Normal	0	110.833	9.23611	1	1:DECEASED	1	0.833333	1	.	.	.	.	.	.	.	.	.	.	.	.	.	.	.	.	.
MB-0205	MB-0205	metabric	53.56	T2	2	1	0	Normal	0	144.467	12.0389	0	0:LIVING	1	0.833333	1	1	.	.	Y605Tfs*27	.	.	.	.	.	.	.	.	.	.	.	.	.
MB-0228	MB-0228	metabric	63.35	T1	1	1	0	Normal	1	10.8333	0.902778	1	1:DECEASED	1	0.833333	1	1	.	.	.	.	.	.	.	H1047R	.	.	.	.	.	.	.	.
MTS-T0076	MTS-T0076	metabric	80	T2	3	.	.	.	1	.	.	.	.	2	1.66667	2	.	V460Gfs*4	.	.	.	.	AMP	.	H1047R	.	.	.	.	.	AMP	.	.
MTS-T0078	MTS-T0078	metabric	70	T3	2	.	.	.	0	.	.	.	.	2	1.66667	2	.	.	.	.	.	.	.	.	E545K	.	.	.	.	.	.	.	.
MTS-T0082	MTS-T0082	metabric	75	T3	2	.	.	.	1	.	.	.	.	2	1.66667	2	.	X765_splice	.	.	.	.	.	.	H1047R	.	.	.	.	.	.	.	.
MTS-T0093	MTS-T0093	metabric	73	T2	2	1	.	.	0	.	.	.	.	2	1.66667	2	.	A408Sfs*11	.	.	.	.	.	.	H1047R	.	.	.	.	.	.	.	.
MTS-T0177	MTS-T0177	metabric	65.7	T1	3	0	.	.	0	.	.	.	.	2	1.66667	2	.	.	.	.	not profiled	.	.	.	.	.	.	.	.	not profiled	not profiled	.	.
MTS-T0276	MTS-T0276	metabric	70	T3	3	0	.	.	1	.	.	.	.	2	1.66667	2	.	.	.	.	.	.	.	.	H1047R	.	.	.	.	.	.	.	.
MTS-T0701	MTS-T0701	metabric	49	.	2	1	.	.	.	.	.	.	.	2	1.66667	2	.	E243*	C176Afs*71	.	.	.	AMP	.	.	.	.	.	.	.	AMP	.	.
MTS-T0084	MTS-T0084	metabric	87	T3	2	.	.	.	0	.	.	.	.	3	2.5	2	.	X522_splice	.	.	.	V264Efs*38	.	.	H1047R	.	.	.	.	.	.	.	.
MTS-T0085	MTS-T0085	metabric	67	T2	2	.	.	.	1	.	.	.	.	3	2.5	2	.	.	.	.	.	.	.	.	.	.	.	.	.	.	.	.	.
MTS-T0088	MTS-T0088	metabric	89	T2	2	1	.	.	0	.	.	.	.	3	2.5	2	.	Q23*	.	.	.	.	.	.	H1047L	.	.	.	.	.	.	.	.
MTS-T0089	MTS-T0089	metabric	70	T2	2	.	.	.	0	.	.	.	.	3	2.5	2	.	.	.	.	.	.	T862S	.	.	.	.	.	.	.	AMP	.	.
MTS-T0091	MTS-T0091	metabric	65	T1	2	.	.	.	0	.	.	.	.	3	2.5	2	.	V202Cfs*7	.	.	.	.	.	.	H1047R	.	.	.	.	.	.	.	.
MTS-T0150	MTS-T0150	metabric	38	.	2	1	.	.	.	.	.	.	.	3	2.5	2	.	.	.	.	.	.	.	.	.	K13E	.	.	.	.	AMP	.	.
MTS-T0174	MTS-T0174	metabric	38.6	T1	1	1	.	.	0	.	.	.	.	3	2.5	2	.	.	.	.	not profiled	N351Kfs*19	.	.	H1047R	.	.	.	.	not profiled	not profiled	.	.
MTS-T1296	MTS-T1296	metabric	37	.	2	1	.	.	.	.	.	.	.	3	2.5	2	.	HOMDEL	.	.	.	.	.	.	.	.	.	.	.	.	.	.	.
MTS-T0079	MTS-T0079	metabric	78	T3	3	.	.	.	1	.	.	.	.	4	3.33333	2	.	Q610*	.	.	.	.	.	.	.	.	.	.	.	.	AMP	.	.
MTS-T0081	MTS-T0081	metabric	76	T3	2	.	.	.	0	.	.	.	.	4	3.33333	2	.	A634V	.	.	.	.	.	.	.	.	.	.	.	.	.	HOMDEL	.
MTS-T0083	MTS-T0083	metabric	54	T3	2	.	.	.	0	.	.	.	.	4	3.33333	2	.	Q23*	.	.	.	.	.	.	.	.	.	.	.	.	.	.	.
MTS-T0156	MTS-T0156	metabric	49	.	2	1	.	.	.	.	.	.	.	4	3.33333	2	.	A634V	.	H106Gfs*34	.	R366Efs*38	.	.	N345K	.	.	.	.	.	.	.	.
MTS-T0199	MTS-T0199	metabric	75.61	T2	2	1	.	.	0	.	.	.	.	4	3.33333	2	.	.	.	.	not profiled	E359Afs*44	.	.	.	.	.	.	.	not profiled	not profiled	.	.
MTS-T0200	MTS-T0200	metabric	58.85	T1	2	1	.	.	0	.	.	.	.	4	3.33333	2	.	.	.	.	not profiled	.	.	.	E545K	.	.	.	.	not profiled	not profiled	.	.
MTS-T0210	MTS-T0210	metabric	66.13	.	3	1	.	.	0	.	.	.	.	4	3.33333	2	.	.	.	.	not profiled	.	.	.	.	.	.	.	.	not profiled	not profiled	.	.
MTS-T1302	MTS-T1302	metabric	42	.	2	1	.	.	.	.	.	.	.	4	3.33333	2	.	L652*	.	.	not profiled	.	.	.	.	.	.	.	.	not profiled	not profiled	.	.
MTS-T0066	MTS-T0066	metabric	73	T1	2	.	.	.	0	.	.	.	.	5	4.16667	2	.	.	A159V	.	AMP	.	.	.	H1047R, AMP	.	.	.	.	.	.	.	.
MB-5298	MB-5298	metabric	49.63	T2	3	2	0	Basal	1	84.9	7.075	1	1:DECEASED	3	2.5	2	.	.	M246R	.	.	.	.	.	.	.	.	.	.	.	.	.	.
MB-5390	MB-5390	metabric	37.27	T1	3	2	0	Basal	1	30.9333	2.57778	1	1:DECEASED	5	4.16667	2	.	.	L111Afs*11	.	.	.	.	.	.	.	.	.	S398*	.	.	.	.
MB-4005	MB-4005	metabric	66.37	T1	2	1	0	claudin-low	0	188.367	15.6972	0	0:LIVING	4	3.33333	2	.	.	R175H	.	.	.	.	.	.	HOMDEL	.	.	.	.	.	.	.
MB-0470	MB-0470	metabric	61.78	T1	1	2	0	claudin-low	0	88.2333	7.35278	0	0:LIVING	4	3.33333	2	1	Q23*	.	.	.	.	L755S	.	H1047R	.	.	.	.	.	.	.	.
MB-2845	MB-2845	metabric	55.8	T1	2	1	0	claudin-low	0	264.767	22.0639	0	0:LIVING	5	4.16667	2	.	.	.	.	.	.	.	.	H1047R	.	.	.	.	.	AMP	.	.
MB-4876	MB-4876	metabric	42.45	T2	2	1	0	claudin-low	0	150.6	12.55	1	1:DECEASED	5	4.16667	2	.	.	.	.	.	.	.	.	.	.	.	.	.	.	.	.	.
MB-7054	MB-7054	metabric	73.74	T1	3	0	0	claudin-low	1	30.4333	2.53611	1	1:DECEASED	5	4.16667	2	.	.	I195T	.	.	.	.	.	.	.	.	.	.	.	.	.	.
MB-0657	MB-0657	metabric	58.65	T3	2	1	0	claudin-low	0	30.4333	2.53611	0	0:LIVING	5	4.16667	2	1	F601Lfs*2	.	.	.	.	.	.	H1047R	.	.	.	.	.	.	.	.
MB-0593	MB-0593	metabric	62.34	T3	2	0	1	Her2	1	34.6667	2.88889	1	1:DECEASED	2	1.66667	2	.	L442Wfs*13	.	.	.	.	AMP	E745K	.	.	.	.	.	.	.	.	.
MB-5366	MB-5366	metabric	75.56	T2	3	1	0	Her2	1	243.167	20.2639	0	0:LIVING	2	1.66667	2	.	.	.	.	.	.	AMP	.	H1047R	.	.	.	.	.	.	.	.
MB-6358	MB-6358	metabric	57.77	T2	2	0	1	Her2	0	37.8667	3.15556	1	1:DECEASED	4	3.33333	2	.	.	N345_L348delinsM	.	.	AMP	AMP	.	.	.	.	.	.	.	.	.	.
MB-0035	MB-0035	metabric	84.22	T2	2	1	0	Her2	0	36.2667	3.02222	1	1:DECEASED	5	4.16667	2	.	G500Wfs*37	.	.	.	.	.	.	H1047R	.	.	.	.	.	.	.	.
MB-4289	MB-4289	metabric	65.49	T1	1	1	1	Her2	0	96.8333	8.06944	1	1:DECEASED	5	4.16667	2	.	I807Mfs*9	.	A418T	.	.	.	.	.	.	.	.	.	.	AMP	.	.
MB-5313	MB-5313	metabric	79.12	T2	.	1	0	Her2	1	46.5333	3.87778	1	1:DECEASED	5	4.16667	2	.	.	R273G	.	.	.	.	.	K111del	.	.	.	.	.	.	.	.
MB-7273	MB-7273	metabric	47.47	T1	3	0	1	Her2	1	208.2	17.35	0	0:LIVING	5	4.16667	2	.	.	E258Q	.	.	.	AMP	.	.	.	.	.	.	.	.	.	.
MB-0145	MB-0145	metabric	62.4	T1	2	1	0	LumA	0	147.667	12.3056	0	0:LIVING	2	1.66667	2	.	X522_splice	.	.	.	.	.	.	.	HOMDEL	.	.	.	.	.	HOMDEL	.
MB-4797	MB-4797	metabric	81.06	T1	2	1	0	LumA	0	99.3667	8.28056	1	1:DECEASED	2	1.66667	2	.	X721_splice	.	.	.	.	.	.	.	.	.	.	.	.	AMP	.	.
MB-0147	MB-0147	metabric	79.28	T2	2	1	0	LumA	1	51.7667	4.31389	1	1:DECEASED	2	1.66667	2	6	R527*	.	.	.	.	.	.	.	.	.	.	.	.	AMP	.	.
MB-0491	MB-0491	metabric	43.4	T2	2	1	0	LumA	0	125.8	10.4833	0	0:LIVING	2	1.66667	2	3	K664*	.	.	.	.	.	.	N345K	.	.	.	.	.	.	.	.
MB-0621	MB-0621	metabric	70.04	T2	2	1	0	LumA	1	33.5667	2.79722	0	0:LIVING	2	1.66667	2	1	Y37Pfs*14	.	.	.	.	.	.	E545G	.	.	.	.	.	.	.	.
MB-0605	MB-0605	metabric	58.08	T1	2	1	0	LumA	0	114.6	9.55	0	0:LIVING	3	2.5	2	.	Q23*	.	.	.	.	.	.	N345K	.	.	.	.	.	.	.	.
MB-4872	MB-4872	metabric	58.69	T1	2	1	0	LumA	1	157.1	13.0917	0	0:LIVING	3	2.5	2	.	.	.	.	.	.	.	.	S629C	.	.	.	.	.	.	.	.
MB-7195	MB-7195	metabric	72.99	T2	2	1	0	LumA	0	80.4333	6.70278	1	1:DECEASED	3	2.5	2	.	.	.	.	.	.	.	.	H1047R, G106R	.	.	.	.	.	.	.	.
MB-7212	MB-7212	metabric	62.26	T1	3	1	0	LumA	0	52.5	4.375	1	1:DECEASED	3	2.5	2	.	S337Ffs*12	.	.	.	.	.	.	H1047R	.	.	.	.	.	.	.	.
MB-0431	MB-0431	metabric	63.61	T3	2	1	0	LumA	1	85.1333	7.09444	0	0:LIVING	3	2.5	2	3	.	.	W113*, W113R	.	.	.	.	.	.	.	.	.	.	.	.	.
MB-0410	MB-0410	metabric	57.41	T1	2	1	0	LumA	0	63	5.25	0	0:LIVING	3	2.5	2	1	.	.	.	.	.	.	.	E545K	.	.	.	.	.	.	.	.
MB-0521	MB-0521	metabric	52.2	T2	2	1	0	LumA	1	212.2	17.6833	0	0:LIVING	4	3.33333	2	.	HOMDEL	.	.	.	.	.	.	.	.	.	.	.	.	.	.	.
MB-0586	MB-0586	metabric	77.99	T3	2	1	0	LumA	1	77.2333	6.43611	1	1:DECEASED	4	3.33333	2	.	.	.	.	.	.	.	.	.	.	.	.	.	.	AMP	.	.
MB-3049	MB-3049	metabric	57.17	T1	2	1	0	LumA	0	259.967	21.6639	0	0:LIVING	4	3.33333	2	.	S180F	.	.	.	.	.	.	E542K	.	.	.	.	.	AMP	.	.
MB-3378	MB-3378	metabric	65.5	T1	2	1	0	LumA	0	87.5333	7.29444	1	1:DECEASED	4	3.33333	2	.	X379_splice	.	.	.	.	.	.	H1047R	.	.	.	.	.	.	.	.
MB-4764	MB-4764	metabric	57.95	T2	3	1	0	LumA	0	245.5	20.4583	0	0:LIVING	4	3.33333	2	.	Q449*	.	.	.	.	.	.	E542K, E726K	.	.	.	.	.	.	.	.
MB-6021	MB-6021	metabric	51.94	.	2	1	0	LumA	0	301.233	25.1028	0	0:LIVING	4	3.33333	2	.	.	.	.	.	.	.	.	H1047R, N345K	.	.	.	.	.	.	.	.
MB-7060	MB-7060	metabric	69.25	T2	1	1	0	LumA	1	112.667	9.38889	1	1:DECEASED	4	3.33333	2	.	Q351Sfs*7	.	.	.	.	.	.	.	.	.	.	.	.	AMP	.	.
MB-7295	MB-7295	metabric	43.1	T2	3	1	0	LumA	1	196.867	16.4056	0	0:LIVING	4	3.33333	2	.	.	.	.	.	.	.	.	E542K	.	.	.	.	.	.	.	.
MB-2854	MB-2854	metabric	61.53	T2	2	1	0	LumA	0	270.433	22.5361	0	0:LIVING	5	4.16667	2	.	R6Pfs*50	F134L	.	.	.	.	.	.	.	.	.	.	.	.	.	.
MB-3002	MB-3002	metabric	62.32	T2	2	1	0	LumA	1	140.567	11.7139	1	1:DECEASED	5	4.16667	2	.	T748Pfs*22	.	.	.	.	P122L	.	.	.	.	.	.	.	.	.	.
MB-3379	MB-3379	metabric	60.99	T1	3	1	1	LumA	0	113.833	9.48611	1	1:DECEASED	5	4.16667	2	.	E512Dfs*16	.	.	.	.	AMP	.	H1047R	.	.	.	.	.	.	.	AMP
MB-5074	MB-5074	metabric	70.59	T2	3	1	0	LumA	0	221.6	18.4667	1	1:DECEASED	5	4.16667	2	.	I650Yfs*13	.	.	.	X308_splice	.	.	.	.	.	.	.	.	.	.	.
MB-5554	MB-5554	metabric	57.75	T2	1	1	0	LumA	0	229.833	19.1528	0	0:LIVING	5	4.16667	2	.	H233Qfs*11	.	.	.	.	.	.	E545K	.	.	.	.	.	AMP	I1583T	.
MB-7101	MB-7101	metabric	49.16	T1	2	1	0	LumA	0	124.267	10.3556	0	0:LIVING	5	4.16667	2	.	Q511*	.	.	.	.	.	.	R108del	.	.	.	.	.	.	.	.
MB-7173	MB-7173	metabric	67.4	T2	2	1	0	LumA	0	63.5333	5.29444	1	1:DECEASED	5	4.16667	2	.	X379_splice	.	.	.	.	L755S	.	Q546K	.	.	.	.	.	AMP	.	.
MB-7218	MB-7218	metabric	57.87	T1	1	1	0	LumA	1	165.433	13.7861	0	0:LIVING	5	4.16667	2	.	.	.	.	.	R305P	.	.	P449_L452del	.	.	.	.	.	.	.	.
MB-0369	MB-0369	metabric	65.47	T2	3	1	0	LumB	1	144.333	12.0278	0	0:LIVING	2	1.66667	2	.	T115Nfs*53	.	.	.	.	.	.	.	.	.	.	.	.	.	.	.
MB-3389	MB-3389	metabric	63.34	T1	3	1	0	LumB	0	240.7	20.0583	0	0:LIVING	2	1.66667	2	.	.	.	.	.	.	.	.	.	.	.	.	.	.	AMP	.	.
MB-0083	MB-0083	metabric	64.85	T1	2	1	0	LumB	0	86.0667	7.17222	1	1:DECEASED	2	1.66667	2	1	.	.	.	.	.	.	.	N345K, E81K	.	.	.	.	.	AMP	.	.
MB-0429	MB-0429	metabric	78.86	T2	3	1	0	LumB	1	74.4667	6.20556	1	1:DECEASED	3	2.5	2	.	D59Ifs*24	.	.	.	.	R929W	.	.	.	.	.	.	.	.	.	AMP
MB-5463	MB-5463	metabric	71.91	T2	.	1	0	LumB	1	58.1333	4.84444	1	1:DECEASED	3	2.5	2	.	X11_splice	.	.	.	.	.	.	.	.	.	.	.	.	AMP	.	.
MB-2769	MB-2769	metabric	59.9	T1	2	1	0	LumB	0	160	13.3333	0	0:LIVING	4	3.33333	2	.	Y296Mfs*59, D292Afs*62	.	.	.	.	.	.	.	.	.	.	.	.	.	.	.
MB-2754	MB-2754	metabric	66.11	T2	2	2	0	Normal	0	203.533	16.9611	1	1:DECEASED	2	1.66667	2	.	Y101Tfs*16	.	.	.	.	.	.	.	.	.	.	.	.	.	.	.
MB-6014	MB-6014	metabric	44.48	T3	1	1	0	Normal	0	191.933	15.9944	1	1:DECEASED	2	1.66667	2	.	.	.	.	.	.	.	.	H1047R	.	.	.	.	.	.	.	.
MB-6319	MB-6319	metabric	57.9	T3	2	1	0	Normal	1	154.7	12.8917	0	0:LIVING	2	1.66667	2	.	.	.	.	.	.	.	.	.	.	.	.	.	.	.	.	.
MB-0344	MB-0344	metabric	59.75	T2	2	1	0	Normal	1	152.933	12.7444	0	0:LIVING	2	1.66667	2	3	A634V	E285K	.	.	.	.	.	.	.	.	.	.	.	.	.	.
MB-0578	MB-0578	metabric	59.64	T2	2	1	0	Normal	1	110.1	9.175	0	0:LIVING	2	1.66667	2	3	.	.	.	.	.	.	.	E545K, M1043V	.	.	.	.	.	.	.	.
MB-0116	MB-0116	metabric	42.55	T3	2	1	0	Normal	1	122.267	10.1889	0	0:LIVING	2	1.66667	2	1	T457Dfs*7	.	.	.	.	.	.	.	.	.	.	.	.	.	.	.
MB-0101	MB-0101	metabric	46.89	T2	2	1	0	Normal	0	148.033	12.3361	0	0:LIVING	3	2.5	2	.	R732Q	.	.	.	.	.	.	H1047L, E726K	.	.	.	.	.	.	.	.
MB-3429	MB-3429	metabric	49.08	T2	2	1	0	Normal	1	243.5	20.2917	0	0:LIVING	3	2.5	2	.	.	.	.	.	.	.	.	.	.	.	.	.	.	.	.	.
MB-0342	MB-0342	metabric	54.96	T2	2	1	0	Normal	0	125.333	10.4444	1	1:DECEASED	3	2.5	2	1	.	.	.	.	.	.	.	E542K	.	.	.	.	.	.	.	.
MB-2900	MB-2900	metabric	59.29	T2	2	1	0	Normal	1	20.6667	1.72222	1	1:DECEASED	4	3.33333	2	.	.	K132N	.	.	.	.	.	.	.	.	.	.	.	.	.	.
MB-3085	MB-3085	metabric	43.68	T2	2	1	0	Normal	0	210.967	17.5806	1	1:DECEASED	4	3.33333	2	.	.	.	.	.	.	.	.	.	.	.	.	.	.	.	.	.
MB-4718	MB-4718	metabric	44.27	T3	1	1	0	Normal	0	198.333	16.5278	1	1:DECEASED	4	3.33333	2	.	Y37Hfs*19	.	.	.	.	.	.	H1047R	.	.	.	.	.	.	.	.
MB-2744	MB-2744	metabric	45.57	T2	2	1	0	Normal	0	275.633	22.9694	0	0:LIVING	5	4.16667	2	.	.	.	.	.	.	.	.	C420R	.	.	.	.	.	.	.	.
MB-4798	MB-4798	metabric	44.51	T2	2	1	0	Normal	0	257.167	21.4306	0	0:LIVING	5	4.16667	2	.	.	.	.	.	X308_splice	.	.	.	.	.	.	.	.	.	.	.
MB-4978	MB-4978	metabric	58.89	T1	.	1	0	Normal	0	198.433	16.5361	0	0:LIVING	5	4.16667	2	.	I485Sfs*37	.	L263Pfs*3	.	.	.	.	.	.	.	.	.	.	.	.	.
MB-6023	MB-6023	metabric	60.28	T2	2	1	0	Normal	0	232.967	19.4139	0	0:LIVING	5	4.16667	2	.	Q673Lfs*5	.	.	.	.	I767M	.	.	.	.	.	.	.	.	.	.
MTS-T0094	MTS-T0094	metabric	83	T1	2	1	.	.	0	.	.	.	.	6	5	3	.	.	C242Y	.	.	.	.	.	E81K	.	.	.	.	.	.	.	.
MTS-T0183	MTS-T0183	metabric	39.78	T1	3	0	.	.	1	.	.	.	.	6	5	3	.	.	X224_splice	.	not profiled	.	.	.	.	.	.	.	.	not profiled	not profiled	.	.
MTS-T0342	MTS-T0342	metabric	63	T1	1	1	.	.	.	.	.	.	.	6	5	3	.	.	.	.	not profiled	.	.	.	.	.	.	.	.	not profiled	not profiled	.	.
MTS-T1954	MTS-T1954	metabric	67.7	T2	2	1	.	.	0	.	.	.	.	6	5	3	.	.	.	.	not profiled	.	.	.	.	.	.	.	.	not profiled	not profiled	.	.
MTS-T2127	MTS-T2127	metabric	72.9	T2	2	0	.	.	0	.	.	.	.	6	5	3	.	.	X187_splice	.	not profiled	.	.	.	.	.	.	.	.	not profiled	not profiled	.	.
MTS-T0086	MTS-T0086	metabric	64	T2	2	1	.	.	1	.	.	.	.	7	5.83333	3	.	G31Afs*25	.	.	.	.	.	.	.	.	.	.	.	.	AMP	.	.
MTS-T0095	MTS-T0095	metabric	62	T3	2	1	.	.	1	.	.	.	.	7	5.83333	3	.	HOMDEL	.	V281L, W170R	.	.	.	.	.	.	.	.	.	.	.	.	.
MTS-T2085	MTS-T2085	metabric	77.97	T1	3	1	.	.	0	.	.	.	.	7	5.83333	3	.	.	R175H	.	not profiled	.	.	.	.	.	.	.	.	not profiled	not profiled	.	.
MTS-T2414	MTS-T2414	metabric	63.22	T1	3	1	.	.	0	.	.	.	.	9	7.5	3	.	D155Rfs*13	.	.	.	.	.	E928G	.	.	.	.	.	.	.	.	.
MTS-T0206	MTS-T0206	metabric	65.24	T2	3	1	.	.	1	.	.	.	.	10	8.33333	3	.	.	.	.	not profiled	.	.	.	.	.	.	.	.	not profiled	not profiled	.	.
MTS-T1571	MTS-T1571	metabric	78	T2	3	1	.	.	1	.	.	.	.	11	9.16667	3	.	A617Gfs*46	.	.	not profiled	.	.	.	.	E43*	.	.	.	not profiled	not profiled	.	.
MB-0582	MB-0582	metabric	84.76	T2	3	2	0	Basal	0	15.5333	1.29444	1	1:DECEASED	6	5	3	.	.	P151H	.	.	AMP	.	.	.	.	.	.	.	.	.	.	.
MB-5299	MB-5299	metabric	53.35	T2	3	2	0	Basal	1	16.7	1.39167	1	1:DECEASED	8	6.66667	3	.	.	C176S	.	.	.	.	.	Y361C, AMP	HOMDEL	.	.	.	.	.	.	.
MB-0222	MB-0222	metabric	50.31	T1	#N/A	1	0	claudin-low	0	212.7	17.725	0	0:LIVING	6	5	3	.	.	.	.	.	X308_splice	.	.	E542K	.	.	.	.	.	.	.	.
MB-6147	MB-6147	metabric	76.01	T1	1	1	0	claudin-low	0	238.067	19.8389	1	1:DECEASED	6	5	3	.	.	.	.	.	.	.	.	.	.	.	.	.	.	.	.	.
MB-5392	MB-5392	metabric	57.34	T1	3	2	0	claudin-low	0	237.267	19.7722	0	0:LIVING	10	8.33333	3	.	.	M246V	.	.	.	.	.	H1047R	.	.	.	.	.	.	.	.
MB-5327	MB-5327	metabric	66.94	T2	2	0	1	Her2	0	163.533	13.6278	0	0:LIVING	7	5.83333	3	.	.	C141*	.	.	.	AMP	.	AMP	.	.	.	.	.	.	.	.
MB-0188	MB-0188	metabric	82.65	T2	2	2	0	Her2	1	31.3	2.60833	1	1:DECEASED	7	5.83333	3	3	.	.	.	.	.	.	.	E542K, E726K	.	.	.	.	.	.	.	.
MB-5593	MB-5593	metabric	40.53	T2	3	0	1	Her2	1	92.5	7.70833	1	1:DECEASED	11	9.16667	3	.	.	-125fs	.	.	.	AMP	.	H1047R	.	.	.	.	.	.	V2687I	.
MB-2840	MB-2840	metabric	60.48	T1	2	1	0	LumA	0	269	22.4167	0	0:LIVING	6	5	3	.	R732Gfs*38	.	S707Rfs*177	.	.	.	.	N345K, M1043I	.	.	.	.	.	.	.	.
MB-4698	MB-4698	metabric	59.18	T1	3	1	0	LumA	1	170.667	14.2222	1	1:DECEASED	6	5	3	.	.	.	.	.	.	.	.	E542K	.	.	.	.	.	.	.	.
MB-4853	MB-4853	metabric	62.35	T1	.	1	0	LumA	0	265.933	22.1611	0	0:LIVING	6	5	3	.	Q610*	.	.	.	X308_splice	.	.	.	.	.	.	.	.	.	.	.
MB-4860	MB-4860	metabric	44.95	T1	2	1	0	LumA	0	234.6	19.55	0	0:LIVING	6	5	3	.	D257*	R175H	.	.	.	.	.	E545K	.	.	.	.	.	.	.	.
MB-0302	MB-0302	metabric	81.53	T2	3	1	0	LumA	1	84.2	7.01667	1	1:DECEASED	7	5.83333	3	.	.	.	.	.	.	E770_A771insGIRD	.	.	.	.	.	.	.	.	.	.
MB-3110	MB-3110	metabric	61.07	T1	2	1	0	LumA	1	100.733	8.39444	0	0:LIVING	7	5.83333	3	.	.	.	D154V	.	.	.	.	E545K	.	.	.	.	.	.	.	.
MB-4716	MB-4716	metabric	52.98	T2	3	1	0	LumA	0	76.1333	6.34444	1	1:DECEASED	7	5.83333	3	.	.	.	.	.	.	.	.	.	.	.	.	.	.	.	.	.
MB-4721	MB-4721	metabric	66.39	T3	1	1	0	LumA	1	23.7333	1.97778	1	1:DECEASED	7	5.83333	3	.	.	.	.	.	.	L755S	.	.	.	.	.	.	.	.	.	.
MB-4968	MB-4968	metabric	56.03	T2	2	1	0	LumA	1	78.7	6.55833	0	0:LIVING	7	5.83333	3	.	.	.	.	.	.	.	.	.	.	.	.	.	.	.	.	.
MB-5184	MB-5184	metabric	79.76	T1	2	1	0	LumA	0	89.3333	7.44444	1	1:DECEASED	7	5.83333	3	.	G324_V328del	.	.	.	.	.	.	H1047R	.	.	.	.	.	.	S3366Mfs*2, V3365_S3366insELY	.
MB-5484	MB-5484	metabric	47.3	T1	2	1	0	LumA	0	238.5	19.875	0	0:LIVING	7	5.83333	3	.	E336=	.	.	.	.	.	.	H1047R	.	.	.	.	.	.	.	.
MB-5563	MB-5563	metabric	76.3	T1	2	1	0	LumA	0	117.667	9.80556	1	1:DECEASED	7	5.83333	3	.	E497Rfs*25	.	.	.	.	L755S, AMP	.	.	.	.	.	.	.	.	.	.
MB-6133	MB-6133	metabric	74.6	T2	2	1	0	LumA	0	61.8	5.15	1	1:DECEASED	7	5.83333	3	.	Q23*	.	.	.	.	.	.	E365K	HOMDEL	.	.	.	.	.	.	.
MB-6167	MB-6167	metabric	75.02	T1	2	1	0	LumA	1	122.8	10.2333	1	1:DECEASED	7	5.83333	3	.	E604*	.	.	.	.	.	.	.	.	.	.	.	.	.	D806N	.
MB-6253	MB-6253	metabric	62.9	T1	1	1	0	LumA	0	194.367	16.1972	0	0:LIVING	7	5.83333	3	.	.	.	.	.	.	.	.	H1047R	.	.	.	.	.	.	.	.
MB-5191	MB-5191	metabric	54.75	T1	3	1	0	LumA	0	142.167	11.8472	1	1:DECEASED	8	6.66667	3	.	X130_splice	.	.	.	.	.	.	.	.	.	.	.	.	.	.	.
MB-5492	MB-5492	metabric	74.28	T3	3	1	0	LumA	1	23.3667	1.94722	1	1:DECEASED	8	6.66667	3	.	Q503*, HOMDEL	.	.	.	.	.	.	.	.	.	.	.	.	.	.	.
MB-6012	MB-6012	metabric	67.46	T2	2	1	0	LumA	0	144.433	12.0361	1	1:DECEASED	8	6.66667	3	.	.	.	.	.	N351Kfs*19	.	.	G118D	.	.	.	.	.	.	.	.
MB-6195	MB-6195	metabric	66.01	T2	2	1	0	LumA	0	202.233	16.8528	0	0:LIVING	8	6.66667	3	.	E534Rfs*23	.	K182Efs*44	.	.	.	.	E545K	.	.	.	.	.	.	.	.
MB-0112	MB-0112	metabric	83.89	T3	3	1	0	LumA	1	39.1667	3.26389	1	1:DECEASED	8	6.66667	3	3	P744Qfs*26	.	.	.	.	.	.	.	.	.	.	.	.	.	.	.
MB-3021	MB-3021	metabric	63.08	T2	3	1	0	LumA	1	217.567	18.1306	1	1:DECEASED	9	7.5	3	.	D288N	.	.	.	.	.	.	.	.	.	.	.	.	AMP	.	.
MB-4033	MB-4033	metabric	82.17	T2	2	1	0	LumA	1	15.2	1.26667	1	1:DECEASED	9	7.5	3	.	X722_splice	E285*, E271K	.	.	.	.	.	.	.	.	.	.	.	.	.	.
MB-4992	MB-4992	metabric	66.47	T2	2	2	0	LumA	0	165.367	13.7806	0	0:LIVING	9	7.5	3	.	E739Dfs*31	.	.	.	.	V777L, T862A	T355I	.	.	.	.	.	.	AMP	.	.
MB-7004	MB-7004	metabric	74.2	T2	2	1	0	LumA	1	50.4667	4.20556	0	0:LIVING	9	7.5	3	.	.	.	.	.	.	.	.	.	.	.	.	.	.	.	.	.
MB-2770	MB-2770	metabric	60.32	T2	2	1	0	LumA	1	274.367	22.8639	0	0:LIVING	10	8.33333	3	.	.	.	.	.	.	.	.	.	.	.	.	.	.	.	.	.
MB-6006	MB-6006	metabric	86.61	T1	1	1	0	LumA	0	63.5667	5.29722	1	1:DECEASED	10	8.33333	3	.	.	.	.	.	.	.	.	H1047R, E726K	.	.	.	.	.	.	.	.
MB-6283	MB-6283	metabric	73.07	T2	3	1	0	LumA	1	92.4	7.7	1	1:DECEASED	10	8.33333	3	.	.	.	.	.	V337Cfs*15	.	.	H1047L	.	.	.	N507D	.	AMP	.	.
MB-4708	MB-4708	metabric	63.03	T1	3	1	0	LumA	0	227.9	18.9917	1	1:DECEASED	11	9.16667	3	.	.	.	.	.	.	.	.	E453K	.	.	.	Q1091E	.	.	.	.
MB-5147	MB-5147	metabric	54.61	T2	3	1	1	LumA	0	20.2667	1.68889	0	0:LIVING	11	9.16667	3	.	D349V	.	.	.	.	AMP	.	H1047R	.	.	.	.	.	.	.	.
MB-5596	MB-5596	metabric	54.27	T2	2	1	0	LumA	1	167.933	13.9944	1	1:DECEASED	11	9.16667	3	.	.	.	.	.	.	.	G324R	.	.	.	.	.	.	.	.	.
MB-4741	MB-4741	metabric	53.02	T1	2	1	0	LumB	1	56.5	4.70833	1	1:DECEASED	6	5	3	.	X55_splice	.	.	.	.	.	.	E542K	.	.	.	.	.	AMP	.	.
MB-4846	MB-4846	metabric	63.07	T2	2	1	1	LumB	0	101.633	8.46944	1	1:DECEASED	6	5	3	.	Q610*	.	.	.	.	AMP	.	E545G	.	.	.	A1043T	.	AMP	.	.
MB-5121	MB-5121	metabric	72.02	T1	3	1	0	LumB	0	114.9	9.575	1	1:DECEASED	7	5.83333	3	.	A719Lfs*3	.	.	.	.	.	.	D454N	.	.	.	.	.	.	.	.
MB-4828	MB-4828	metabric	78.87	T3	3	1	0	LumB	1	42.5	3.54167	1	1:DECEASED	8	6.66667	3	.	L705*	.	.	.	.	.	.	.	.	.	.	.	.	.	HOMDEL	C305S
MB-6008	MB-6008	metabric	80.33	T2	3	1	0	LumB	0	69.1	5.75833	1	1:DECEASED	8	6.66667	3	.	N166Kfs*47	.	.	.	.	.	.	.	.	.	.	.	.	AMP	.	.
MB-7133	MB-7133	metabric	71.41	T1	3	1	0	LumB	1	23.8333	1.98611	1	1:DECEASED	8	6.66667	3	.	.	.	.	.	D335Gfs*17	.	.	.	.	.	.	.	.	AMP	.	.
MB-5493	MB-5493	metabric	69.84	T3	3	1	0	LumB	0	57.2333	4.76944	1	1:DECEASED	9	7.5	3	.	D819Tfs*25	G262Efs*9	.	.	.	.	.	R93L	.	.	.	.	.	.	.	.
MB-4998	MB-4998	metabric	75.27	T2	3	1	0	LumB	1	65.5667	5.46389	1	1:DECEASED	10	8.33333	3	.	Q23*	.	.	.	.	L755_T759del	.	C420R	.	.	.	.	.	.	.	.
MB-7283	MB-7283	metabric	54.42	T2	2	1	0	LumB	1	28.8667	2.40556	1	1:DECEASED	10	8.33333	3	.	W156Lfs*12	E349*, L348F, L348S, E349Wfs*22, E349Tfs*32	.	.	.	.	.	N345K	.	.	.	.	.	.	.	.
MB-5592	MB-5592	metabric	66.01	T1	2	1	0	LumB	0	26.3333	2.19444	1	1:DECEASED	11	9.16667	3	.	P260T	.	.	.	W328*	.	.	H1047R	.	.	.	.	.	AMP	.	.
MB-4695	MB-4695	metabric	61.12	T2	2	1	0	Normal	1	21.3	1.775	1	1:DECEASED	6	5	3	.	.	.	.	.	.	.	.	N1044K	.	.	.	.	.	.	.	.
MB-5178	MB-5178	metabric	65.26	T1	3	1	0	Normal	0	184.333	15.3611	0	0:LIVING	6	5	3	.	Q307*	.	.	.	.	.	.	.	.	.	.	.	.	AMP	.	.
MB-5110	MB-5110	metabric	59.12	T2	.	1	0	Normal	0	21.9	1.825	1	1:DECEASED	8	6.66667	3	.	D402V	.	.	.	.	.	.	H1047L	.	.	.	.	.	.	.	.
MB-5326	MB-5326	metabric	79.26	T2	1	1	0	Normal	0	96.2	8.01667	1	1:DECEASED	8	6.66667	3	.	Q23*	.	.	.	.	.	.	K111E, M1043I	.	.	.	.	.	.	.	.
MTS-T0194	MTS-T0194	metabric	75.68	T2	3	0	.	.	0	.	.	.	.	12	10	4	.	.	G59Rfs*4	.	not profiled	.	.	.	.	.	.	.	.	not profiled	not profiled	.	.
MTS-T0230	MTS-T0230	metabric	47.55	T2	3	0	.	.	1	.	.	.	.	12	10	4	.	.	M237I	.	not profiled	.	.	.	H1047R	.	.	.	.	not profiled	not profiled	.	.
MB-4697	MB-4697	metabric	79.01	T2	.	1	0	.	0	118	9.83333	1	1:DECEASED	12	10	4	.	.	.	.	.	.	.	.	N345K, E726K	.	.	.	.	.	.	.	.
MTS-T0685	MTS-T0685	metabric	63.25	T2	3	0	.	.	0	.	.	.	.	14	11.6667	4	.	.	X187_splice	.	not profiled	.	.	.	E545K	.	.	.	.	not profiled	not profiled	.	.
MB-6007	MB-6007	metabric	70.65	T2	2	1	0	Her2	0	70.5333	5.87778	1	1:DECEASED	20	16.6667	4	.	E283*, M282I	R175H	.	.	.	.	AMP	H1047R, E726K, AMP	.	.	.	.	.	.	.	E391K
MB-7071	MB-7071	metabric	27.56	T1	3	1	0	Her2	0	102.067	8.50556	0	0:LIVING	22	18.3333	4	.	.	.	.	.	.	.	.	M1043V	L320Ffs*25, R378Ifs*37	.	.	.	.	.	.	.
MB-5330	MB-5330	metabric	70.49	T2	2	1	0	LumA	0	114.533	9.54444	1	1:DECEASED	12	10	4	.	.	.	F136Ifs*2	.	.	.	.	.	.	.	.	.	.	.	.	.
MB-0245	MB-0245	metabric	54.76	T1	.	1	0	LumA	0	164.7	13.725	0	0:LIVING	13	10.8333	4	1	.	.	.	.	.	.	.	H1047R	.	.	.	.	.	.	.	.
MB-5329	MB-5329	metabric	64.64	T3	3	1	0	LumA	1	45.7333	3.81111	1	1:DECEASED	14	11.6667	4	.	D183Tfs*32	R280T	.	.	.	V777L, G727A	.	H1047R	.	.	.	.	.	AMP	S3366Mfs*2, V3365_S3366insELY	.
MB-7041	MB-7041	metabric	79.48	T2	.	1	0	LumA	0	101.967	8.49722	1	1:DECEASED	16	13.3333	4	.	C686*	.	.	.	.	.	.	H1047R	.	.	.	.	.	.	.	.
MTS-T0132	MTS-T0132	metabric	64	.	2	1	.	.	.	.	.	.	.	.	.	.	.	.	.	.	.	.	.	.	.	.	.	.	.	.	.	.	.
MTS-T0260	MTS-T0260	metabric	56.95	T3	1	1	.	.	0	.	.	.	.	.	.	.	.	.	.	.	not profiled	.	.	.	.	.	.	.	.	not profiled	not profiled	.	.
MTS-T0600	MTS-T0600	metabric	67.42	T1	2	1	.	.	0	.	.	.	.	.	.	.	.	.	.	.	.	.	.	.	.	.	.	.	.	.	.	.	.
MTS-T1276	MTS-T1276	metabric	82.49	T2	3	1	.	.	1	.	.	.	.	.	.	.	.	.	.	.	not profiled	.	.	.	.	.	.	.	.	not profiled	not profiled	.	.
MB-0423	MB-0423	metabric	71.1	T2	2	1	0	claudin-low	.	138.933	11.5778	0	0:LIVING	.	.		1	.	.	.	.	.	.	.	.	.	.	.	.	.	.	.	.
MB-0634	MB-0634	metabric	55.99	T1	2	2	0	claudin-low	0	17.7667	1.48056	0	0:LIVING	.	.		3	.	.	.	.	.	.	.	.	.	.	.	.	.	.	.	.
MB-0460	MB-0460	metabric	81.44	T2	2	1	0	claudin-low	0	114	9.5	1	1:DECEASED	.	.		1	.	.	.	.	.	.	.	.	HOMDEL	.	.	.	.	.	.	.
MB-5136	MB-5136	metabric	63.22	T1	3	1	0	LumA	.	178.733	14.8944	0	0:LIVING	.	.		.	.	.	.	.	.	.	.	.	.	.	.	.	.	.	.	.
MB-0312	MB-0312	metabric	70.49	T2	2	1	0	LumB	0	169.6	14.1333	1	1:DECEASED	.	.		.	.	.	.	.	.	.	.	.	.	.	.	.	.	AMP	.	.
MB-0444	MB-0444	metabric	49.87	T2	2	1	0	LumB	1	55.4667	4.62222	1	1:DECEASED	.	.		1	.	.	.	.	.	.	.	.	.	.	.	.	.	.	.	.
MB-0020	MB-0020	metabric	70	T3	3	2	0	Normal	.	22.4	1.86667	1	1:DECEASED	.	.		.	.	.	.	.	.	.	.	.	.	.	.	.	.	.	.	.
MB-0169	MB-0169	metabric	79.28	T2	2	1	0	Normal	.	145.433	12.1194	1	1:DECEASED	.	.		.	.	.	.	.	.	.	.	.	.	.	.	.	.	.	.	.
TCGA-AR-A1AT-01	TCGA-AR-A1AT	tcga_pan_can_atlas_2018	62	T2	2	.	.	.	0	41.8187	3.48489	1	1:DECEASED	27	0.54	1	3	N315Ifs*41	.	.	.	.	.	.	.	.	.	.	.	.	.	.	.
TCGA-AC-A2FK-01	TCGA-AC-A2FK	tcga_pan_can_atlas_2018	45	T2	2	.	.	Normal	1	87.1223	7.26019	0	0:LIVING	1	0.02	1	3	.	.	.	.	.	.	.	.	.	.	.	.	.	.	.	.
TCGA-LL-A440-01	TCGA-LL-A440	tcga_pan_can_atlas_2018	61	T1	2	.	.	LumA	0	24.9532	2.07943	0	0:LIVING	3	0.06	1	3	.	.	.	.	.	.	.	.	.	.	.	.	.	AMP	.	.
TCGA-AO-A1KO-01	TCGA-AO-A1KO	tcga_pan_can_atlas_2018	46	T3	3	.	.	Normal	0	20.4491	1.70409	0	0:LIVING	5	0.1	1	2	.	.	.	.	.	.	ERBB3-CSN2	.	.	.	.	.	.	.	.	.
TCGA-A2-A0EP-01	TCGA-A2-A0EP	tcga_pan_can_atlas_2018	56	T1	2	.	.	LumA	0	118.453	9.87112	0	0:LIVING	9	0.18	1	1	.	.	.	.	.	.	.	.	.	.	.	.	.	.	.	.
TCGA-EW-A1PG-01	TCGA-EW-A1PG	tcga_pan_can_atlas_2018	53	T2	2	.	.	Normal	1	34.553	2.87942	0	0:LIVING	9	0.18	1	1	HOMDEL	.	.	.	.	.	.	.	.	.	.	.	.	.	.	.
TCGA-AC-A2FB-01	TCGA-AC-A2FB	tcga_pan_can_atlas_2018	65	T2	2	.	.	LumA	0	40.5694	3.38078	0	0:LIVING	10	0.2	1	3	W103*	.	.	.	.	AMP	.	.	.	.	.	.	.	.	.	AMP
TCGA-AR-A2LQ-01	TCGA-AR-A2LQ	tcga_pan_can_atlas_2018	59	T3	2	.	.	Normal	0	40.5365	3.37805	0	0:LIVING	10	0.2	1	1	.	.	.	.	.	.	.	.	.	.	.	.	.	.	.	.
TCGA-AR-A2LM-01	TCGA-AR-A2LM	tcga_pan_can_atlas_2018	49	T1	1	.	.	LumA	1	63.6157	5.30131	0	0:LIVING	11	0.22	1	3	.	.	.	.	.	.	.	N345K	.	.	.	.	.	.	.	.
TCGA-BH-A8G0-01	TCGA-BH-A8G0	tcga_pan_can_atlas_2018	54	T2	.	.	.	LumA	1	21.7641	1.81368	0	0:LIVING	12	0.24	1	0	.	.	.	.	.	.	.	.	HOMDEL	.	.	.	.	.	.	.
TCGA-A2-A0ES-01	TCGA-A2-A0ES	tcga_pan_can_atlas_2018	52	T2	1	.	.	LumA	0	71.9992	5.99993	0	0:LIVING	13	0.26	1	7	.	.	HOMDEL	.	.	.	.	.	.	.	.	.	.	.	.	.
TCGA-A2-A0CK-01	TCGA-A2-A0CK	tcga_pan_can_atlas_2018	60	T3	2	.	.	LumA	1	136.733	11.3944	0	0:LIVING	13	0.26	1	1	G278*	.	.	.	.	.	.	.	.	.	.	.	.	AMP	.	.
TCGA-AC-A3HN-01	TCGA-AC-A3HN	tcga_pan_can_atlas_2018	87	T2	1	.	.	LumA	1	16.3067	1.35889	0	0:LIVING	13	0.26	1	1	.	.	.	.	.	.	.	.	.	.	.	.	.	AMP	.	.
TCGA-D8-A1XO-01	TCGA-D8-A1XO	tcga_pan_can_atlas_2018	56	T2	2	.	.	LumA	1	55.298	4.60817	0	0:LIVING	14	0.28	1	1	Q23*	.	.	.	.	.	.	E542K	.	.	.	.	.	.	.	.
TCGA-AC-A3YI-01	TCGA-AC-A3YI	tcga_pan_can_atlas_2018	74	T1	1	.	.	Normal	1	23.2436	1.93697	0	0:LIVING	14	0.28	1	1	D764Gfs*5	.	.	.	.	L755S	.	.	.	.	.	.	.	.	.	.
TCGA-E2-A1IJ-01	TCGA-E2-A1IJ	tcga_pan_can_atlas_2018	57	T1	2	.	.	LumA	0	28.438	2.36984	0	0:LIVING	15	0.3	1	1	T679Dfs*9	.	I294*	.	.	.	.	.	HOMDEL	.	.	.	.	.	.	.
TCGA-W8-A86G-01	TCGA-W8-A86G	tcga_pan_can_atlas_2018	66	T2	2	.	.	LumA	0	11.4081	0.950675	0	0:LIVING	15	0.3	1	1	Y190Lfs*9	.	.	.	.	.	.	.	.	.	.	.	.	.	.	.
TCGA-A2-A0EW-01	TCGA-A2-A0EW	tcga_pan_can_atlas_2018	53	T1	.	.	.	LumA	1	61.939	5.16159	1	1:DECEASED	15	0.3	1	0	X230_splice	.	.	.	.	.	.	Q546R	.	.	.	.	AMP	AMP	.	.
TCGA-AO-A0JJ-01	TCGA-AO-A0JJ	tcga_pan_can_atlas_2018	54	T2	2	.	.	LumA	1	62.0377	5.16981	0	0:LIVING	16	0.32	1	3	V365Tfs*26	.	.	.	.	.	.	.	.	.	.	.	.	.	.	.
TCGA-AR-A2LO-01	TCGA-AR-A2LO	tcga_pan_can_atlas_2018	46	T2	1	.	.	LumA	1	39.3859	3.28216	0	0:LIVING	16	0.32	1	3	.	.	.	.	.	.	.	D520V	HOMDEL	.	.	.	.	.	.	.
TCGA-AC-A2FF-01	TCGA-AC-A2FF	tcga_pan_can_atlas_2018	40	T2	2	.	.	LumA	1	90.7059	7.55882	0	0:LIVING	16	0.32	1	1	R87Afs*6	.	.	.	.	.	.	D350N	M198K	.	.	.	.	.	.	.
TCGA-A2-A0T6-01	TCGA-A2-A0T6	tcga_pan_can_atlas_2018	50	T3	2	.	.	LumA	0	18.9039	1.57533	0	0:LIVING	17	0.34	1	3	S829*	.	.	.	.	R678Q, L755M, L755W	.	.	.	.	.	.	.	.	.	.
TCGA-AC-A6IV-01	TCGA-AC-A6IV	tcga_pan_can_atlas_2018	47	T2	2	.	.	LumA	1	18.6738	1.55615	0	0:LIVING	18	0.36	1	1	R74*	.	.	.	*444Efs*62	.	.	.	.	.	.	.	.	.	.	.
TCGA-HN-A2OB-01	TCGA-HN-A2OB	tcga_pan_can_atlas_2018	45	T2	2	.	.	LumA	1	62.4651	5.20542	1	1:DECEASED	18	0.36	1	1	.	.	.	.	.	.	.	E542K	.	.	.	.	.	.	.	.
TCGA-BH-A42U-01	TCGA-BH-A42U	tcga_pan_can_atlas_2018	80	T2	2	.	.	Normal	0	110.596	9.21634	0	0:LIVING	18	0.36	1	1	.	.	.	.	.	.	.	.	.	.	.	.	.	.	.	.
TCGA-BH-A28Q-01	TCGA-BH-A28Q	tcga_pan_can_atlas_2018	46	T2	2	.	.	LumA	1	36.7886	3.06572	0	0:LIVING	19	0.38	1	3	P127Afs*41	.	X130_splice	.	Q362Efs*38	.	.	.	.	.	.	R1910*	.	.	.	.
TCGA-E9-A6HE-01	TCGA-E9-A6HE	tcga_pan_can_atlas_2018	45	T3	2	.	.	LumA	1	27.8463	2.32052	0	0:LIVING	19	0.38	1	1	T522Ifs*14	R306*	.	.	.	.	.	.	HOMDEL	.	.	.	.	.	.	.
TCGA-E2-A10F-01	TCGA-E2-A10F	tcga_pan_can_atlas_2018	47	T2	3	.	.	LumA	0	28.8654	2.40545	0	0:LIVING	21	0.42	1	3	D313*	.	.	.	.	.	.	H1047R, E726K	.	.	.	.	.	.	.	.
TCGA-4H-AAAK-01	TCGA-4H-AAAK	tcga_pan_can_atlas_2018	50	T2	3	.	.	LumA	1	11.441	0.953414	0	0:LIVING	21	0.42	1	2	X571_splice	.	.	.	.	V777L	.	.	.	.	.	.	.	.	.	.
TCGA-E9-A2JT-01	TCGA-E9-A2JT	tcga_pan_can_atlas_2018	63	T2	3	.	.	LumA	0	9.46839	0.789032	0	0:LIVING	21	0.42	1	2	D402H	.	.	.	.	.	.	.	.	.	.	.	.	.	.	.
TCGA-D8-A27T-01	TCGA-D8-A27T	tcga_pan_can_atlas_2018	53	T2	2	.	.	LumA	1	13.0848	1.0904	0	0:LIVING	21	0.42	1	1	T379=	.	.	.	.	AMP	.	E545K	.	.	.	.	.	.	.	.
TCGA-GM-A4E0-01	TCGA-GM-A4E0	tcga_pan_can_atlas_2018	67	T3	2	.	.	LumA	1	72.0321	6.00267	0	0:LIVING	21	0.42	1	1	N144Tfs*71	.	.	.	.	.	.	.	F258Y, F258L	.	.	.	.	.	.	.
TCGA-AO-A0J8-01	TCGA-AO-A0J8	tcga_pan_can_atlas_2018	61	T2	2	.	.	LumA	0	22.3559	1.86299	0	0:LIVING	22	0.44	1	3	P708Lfs*14	.	.	.	.	.	.	.	.	.	.	.	.	.	.	.
TCGA-A8-A09T-01	TCGA-A8-A09T	tcga_pan_can_atlas_2018	68	T1	3	.	.	LumA	0	19.0354	1.58628	0	0:LIVING	22	0.44	1	2	P127Afs*41	.	.	.	.	.	.	.	.	.	.	.	.	.	.	.
TCGA-AC-A3QP-01	TCGA-AC-A3QP	tcga_pan_can_atlas_2018	79	T2	2	.	.	LumA	1	22.1915	1.84929	0	0:LIVING	22	0.44	1	1	.	.	.	.	.	.	.	.	.	.	.	.	.	.	.	.
TCGA-E9-A5FK-01	TCGA-E9-A5FK	tcga_pan_can_atlas_2018	60	T2	2	.	.	LumA	1	26.6956	2.22463	0	0:LIVING	22	0.44	1	1	S19Rfs*39	.	.	.	.	.	.	.	.	.	.	.	.	.	.	.
TCGA-EW-A1J3-01	TCGA-EW-A1J3	tcga_pan_can_atlas_2018	61	T1	2	.	.	LumA	0	16.5697	1.38081	0	0:LIVING	22	0.44	1	1	.	.	.	.	.	AMP	.	.	.	.	.	.	.	AMP	.	.
TCGA-AR-A24T-01	TCGA-AR-A24T	tcga_pan_can_atlas_2018	46	T3	1	.	.	LumA	1	105.27	8.77251	0	0:LIVING	23	0.46	1	1	.	R273H	.	.	.	.	.	H1047R	.	.	.	.	.	.	.	.
TCGA-E2-A1IL-01	TCGA-E2-A1IL	tcga_pan_can_atlas_2018	78	T1	2	.	.	LumA	1	3.87941	0.323284	0	0:LIVING	23	0.46	1	1	.	.	.	.	.	.	.	H1047R	.	.	.	.	.	.	.	.
TCGA-Z7-A8R5-01	TCGA-Z7-A8R5	tcga_pan_can_atlas_2018	61	T3	2	.	.	LumA	1	108.065	9.00538	0	0:LIVING	23	0.46	1	1	L71Sfs*12	.	X367_splice	.	.	.	.	H1047R	.	.	.	.	.	.	.	.
TCGA-AC-A2FO-01	TCGA-AC-A2FO	tcga_pan_can_atlas_2018	65	T2	2	.	.	LumA	1	74.1362	6.17801	0	0:LIVING	24	0.48	1	3	A824Gfs*5	.	.	.	.	.	.	E545K	.	.	.	.	.	.	.	.
TCGA-LL-A50Y-01	TCGA-LL-A50Y	tcga_pan_can_atlas_2018	84	T2	2	.	.	LumA	0	25.0518	2.08765	0	0:LIVING	24	0.48	1	3	Q23*	.	.	.	.	.	.	H1047R	.	.	.	.	.	.	.	.
TCGA-A8-A0A4-01	TCGA-A8-A0A4	tcga_pan_can_atlas_2018	73	T2	2	.	.	LumA	0	13.019	1.08492	0	0:LIVING	24	0.48	1	1	Q765Pfs*4	.	Y149*	.	.	.	.	.	.	.	.	.	.	AMP	.	.
TCGA-AR-A1AL-01	TCGA-AR-A1AL	tcga_pan_can_atlas_2018	60	T3	1	.	.	LumA	1	97.6756	8.13964	0	0:LIVING	24	0.48	1	1	I505Sfs*17	.	.	.	.	.	.	E545K	.	.	.	.	.	.	.	.
TCGA-3C-AAAU-01	TCGA-3C-AAAU	tcga_pan_can_atlas_2018	55	.	.	.	.	LumA	.	133.051	11.0875	0	0:LIVING	24	0.48	1	0	.	.	.	.	P408Afs*99	.	.	.	.	.	.	.	.	AMP	.	.
TCGA-GM-A5PX-01	TCGA-GM-A5PX	tcga_pan_can_atlas_2018	65	T2	.	.	.	LumA	1	18.1149	1.50957	0	0:LIVING	24	0.48	1	0	I304Nfs*7	.	.	.	.	.	.	.	.	.	.	.	.	.	.	.
TCGA-D8-A3Z6-01	TCGA-D8-A3Z6	tcga_pan_can_atlas_2018	56	T3	2	.	.	LumA	1	18.5094	1.54245	0	0:LIVING	25	0.5	1	1	N431Qfs*14	.	.	.	.	.	.	H1047R	HOMDEL	.	.	.	.	.	.	.
TCGA-A8-A0A6-01	TCGA-A8-A0A6	tcga_pan_can_atlas_2018	64	T2	.	.	.	LumA	1	21.0409	1.75341	0	0:LIVING	25	0.5	1	0	X522_splice	.	.	.	.	L755S	.	G118D	.	.	.	.	.	AMP	.	.
TCGA-E9-A3X8-01	TCGA-E9-A3X8	tcga_pan_can_atlas_2018	48	T2	3	.	.	LumA	1	30.4435	2.53696	0	0:LIVING	26	0.52	1	2	T515_F516ins*	.	.	.	.	.	.	N345K	.	.	.	.	.	.	.	.
TCGA-AC-A3QQ-01	TCGA-AC-A3QQ	tcga_pan_can_atlas_2018	54	T1	.	.	.	LumA	0	24.1312	2.01094	0	0:LIVING	26	0.52	1	1	Q23*	.	.	.	.	AMP	.	.	.	.	.	.	.	AMP	.	.
TCGA-OK-A5Q2-01	TCGA-OK-A5Q2	tcga_pan_can_atlas_2018	59	T2	2	.	.	LumA	1	2.10409	0.175341	0	0:LIVING	26	0.52	1	1	.	.	.	I176M	.	.	.	H1047R	.	.	.	.	.	.	.	.
TCGA-A7-A425-01	TCGA-A7-A425	tcga_pan_can_atlas_2018	70	T3	.	.	.	LumA	1	14.6957	1.22464	0	0:LIVING	26	0.52	1	0	K397Mfs*17	.	.	.	.	.	.	.	.	.	.	.	.	.	.	.
TCGA-A7-A4SC-01	TCGA-A7-A4SC	tcga_pan_can_atlas_2018	62	T3	1	.	.	.	0	14.6629	1.2219	0	0:LIVING	27	0.54	1	1	D288Gfs*4	.	.	.	.	.	.	.	R130Q	.	.	.	.	.	.	.
TCGA-AR-A5QP-01	TCGA-AR-A5QP	tcga_pan_can_atlas_2018	54	T2	2	.	.	LumA	1	38.9585	3.24654	0	0:LIVING	27	0.54	1	3	.	.	.	.	.	.	.	E545K	.	.	.	.	.	.	.	.
TCGA-BH-A0DP-01	TCGA-BH-A0DP	tcga_pan_can_atlas_2018	60	T3	2	.	.	LumA	0	15.6491	1.3041	0	0:LIVING	27	0.54	1	3	.	.	.	.	.	.	.	E542K	.	.	.	.	.	.	.	.
TCGA-A2-A4S2-01	TCGA-A2-A4S2	tcga_pan_can_atlas_2018	62	T3	3	.	.	LumA	1	21.1395	1.76162	0	0:LIVING	27	0.54	1	2	Y835*	.	M184Gfs*25	.	.	.	.	E545K	.	.	.	.	.	.	.	.
TCGA-A2-A0EX-01	TCGA-A2-A0EX	tcga_pan_can_atlas_2018	46	T3	2	.	.	LumA	0	24.723	2.06025	0	0:LIVING	27	0.54	1	1	Q511*	.	.	.	.	.	.	E545K	.	.	.	.	.	.	.	.
TCGA-A2-A0YL-01	TCGA-A2-A0YL	tcga_pan_can_atlas_2018	48	T3	2	.	.	LumA	1	48.4597	4.03831	0	0:LIVING	27	0.54	1	1	T364Hfs*4	.	.	.	.	.	.	H1047R	.	.	.	.	.	.	.	.
TCGA-AC-A2FG-01	TCGA-AC-A2FG	tcga_pan_can_atlas_2018	79	T2	2	.	.	LumA	1	60.9199	5.07666	0	0:LIVING	27	0.54	1	1	V202Cfs*7	.	.	.	.	.	.	.	.	.	.	.	.	.	.	.
TCGA-AR-A5QM-01	TCGA-AR-A5QM	tcga_pan_can_atlas_2018	62	T2	2	.	.	LumA	0	73.3471	6.11226	0	0:LIVING	27	0.54	1	1	R74*	.	.	.	.	.	.	H1047R	.	.	.	.	.	.	.	.
TCGA-E2-A1L8-01	TCGA-E2-A1L8	tcga_pan_can_atlas_2018	52	T2	2	.	.	LumA	1	73.643	6.13692	0	0:LIVING	27	0.54	1	1	X278_splice	.	.	.	.	.	.	H1047R	.	.	.	.	.	.	.	.
TCGA-EW-A6SC-01	TCGA-EW-A6SC	tcga_pan_can_atlas_2018	60	T2	2	.	.	LumA	0	31.2983	2.60819	0	0:LIVING	27	0.54	1	1	F205Lfs*10	.	.	.	.	.	.	E545K	.	.	.	.	.	AMP	.	.
TCGA-OL-A66K-01	TCGA-OL-A66K	tcga_pan_can_atlas_2018	72	T2	2	.	.	LumA	0	41.9173	3.49311	1	1:DECEASED	27	0.54	1	1	A575Gfs*13	.	.	.	X308_splice	.	.	.	.	.	.	.	.	.	.	.
TCGA-AO-A12E-01	TCGA-AO-A12E	tcga_pan_can_atlas_2018	51	T3	.	.	.	LumA	0	70.4211	5.86843	0	0:LIVING	27	0.54	1	0	CDH1-VPS50, VPS50-CDH1	.	.	.	.	.	.	.	.	.	.	.	.	AMP	.	.
TCGA-BH-AB28-01	TCGA-BH-AB28	tcga_pan_can_atlas_2018	53	T3	.	.	.	LumA	1	9.43551	0.786293	0	0:LIVING	27	0.54	1	0	L343del	.	.	.	D335Gfs*21	.	.	.	.	.	.	.	.	.	.	.
TCGA-A8-A0A2-01	TCGA-A8-A0A2	tcga_pan_can_atlas_2018	66	T2	2	.	.	LumA	0	19.0354	1.58628	0	0:LIVING	28	0.56	1	1	E165_P170del	.	.	.	.	.	.	.	HOMDEL	.	.	.	.	.	.	.
TCGA-AC-A3OD-01	TCGA-AC-A3OD	tcga_pan_can_atlas_2018	68	T2	2	.	.	LumA	1	14.8272	1.2356	0	0:LIVING	28	0.56	1	1	Q641*	Q144*	.	.	.	.	.	E545K	.	.	.	.	.	AMP	.	.
TCGA-GM-A5PV-01	TCGA-GM-A5PV	tcga_pan_can_atlas_2018	63	T2	.	.	.	LumA	1	13.5451	1.12875	0	0:LIVING	28	0.56	1	0	X722_splice, HOMDEL	.	.	.	.	.	.	.	D92E, W274Gfs*2	.	.	.	.	.	.	.
TCGA-JL-A3YX-01	TCGA-JL-A3YX	tcga_pan_can_atlas_2018	46	T2	.	.	.	LumA	0	11.5725	0.964373	0	0:LIVING	28	0.56	1	0	.	.	.	.	.	.	.	E542K, E726K	.	.	.	.	.	.	.	.
TCGA-E2-A15L-01	TCGA-E2-A15L	tcga_pan_can_atlas_2018	65	T2	2	.	.	LumA	0	20.5806	1.71505	0	0:LIVING	29	0.58	1	3	.	.	.	.	.	.	.	H1047R	.	.	.	.	.	.	.	.
TCGA-D8-A27I-01	TCGA-D8-A27I	tcga_pan_can_atlas_2018	58	T1	2	.	.	LumA	1	14.4327	1.20273	0	0:LIVING	29	0.58	1	1	N166Mfs*49	.	.	.	.	.	.	.	HOMDEL	.	.	.	.	.	.	.
TCGA-D8-A4Z1-01	TCGA-D8-A4Z1	tcga_pan_can_atlas_2018	68	T1	2	.	.	LumA	0	21.6655	1.80546	0	0:LIVING	29	0.58	1	1	.	.	.	D226E	.	.	.	.	.	.	.	.	.	.	.	.
TCGA-A8-A09V-01	TCGA-A8-A09V	tcga_pan_can_atlas_2018	51	T2	2	.	.	LumA	0	15.0245	1.25204	0	0:LIVING	30	0.6	1	3	N166Mfs*50, HOMDEL	.	.	.	.	.	.	.	.	.	.	.	.	.	HOMDEL	.
TCGA-A8-A0AB-01	TCGA-A8-A0AB	tcga_pan_can_atlas_2018	54	T2	2	.	.	LumA	0	17.03	1.41916	0	0:LIVING	30	0.6	1	3	A401Sfs*2	.	.	.	.	L755S	.	.	.	.	.	.	.	.	HOMDEL	.
TCGA-AR-A5QN-01	TCGA-AR-A5QN	tcga_pan_can_atlas_2018	68	T2	2	.	.	LumA	1	33.3037	2.77531	0	0:LIVING	30	0.6	1	3	HOMDEL	.	.	.	.	.	.	.	.	.	.	.	.	.	.	.
TCGA-A2-A0T4-01	TCGA-A2-A0T4	tcga_pan_can_atlas_2018	62	T2	2	.	.	LumA	0	20.5148	1.70957	0	0:LIVING	31	0.62	1	1	E757*	.	.	.	.	.	.	H1047R	.	.	.	.	.	AMP	.	.
TCGA-A7-A5ZX-01	TCGA-A7-A5ZX	tcga_pan_can_atlas_2018	48	T2	2	.	.	LumA	1	11.0465	0.920538	0	0:LIVING	31	0.62	1	1	L731Ffs*39	.	E327Dfs*33	.	.	.	.	E545A	.	.	.	.	.	.	.	.
TCGA-AR-A2LK-01	TCGA-AR-A2LK	tcga_pan_can_atlas_2018	62	T3	3	.	.	LumB	1	54.2131	4.51776	1	1:DECEASED	31	0.62	1	2	A788Efs*14	.	.	.	.	.	.	H1047R	.	.	.	.	.	AMP	.	.
TCGA-BH-A0C1-01	TCGA-BH-A0C1	tcga_pan_can_atlas_2018	61	T3	3	.	.	LumA	1	46.3885	3.86571	1	1:DECEASED	32	0.64	1	2	P159Lfs*56	.	.	.	.	V777L	.	.	.	.	.	.	.	.	.	.
TCGA-E2-A1B5-01	TCGA-E2-A1B5	tcga_pan_can_atlas_2018	46	T2	2	.	.	LumA	0	32.3503	2.69586	0	0:LIVING	32	0.64	1	1	.	.	.	.	M438Nfs*69	.	.	.	.	.	.	.	.	.	.	.
TCGA-LD-A66U-01	TCGA-LD-A66U	tcga_pan_can_atlas_2018	44	T2	2	.	.	LumA	1	21.2381	1.76984	0	0:LIVING	32	0.64	1	1	X722_splice	.	.	.	.	.	.	E545K	.	.	.	.	.	.	.	.
TCGA-BH-A0E9-01	TCGA-BH-A0E9	tcga_pan_can_atlas_2018	53	T2	3	.	.	LumA	1	81.8292	6.8191	0	0:LIVING	33	0.66	1	2	E757Mfs*14	.	.	.	.	.	.	.	X70_splice	.	.	.	.	.	.	.
TCGA-A2-A0EN-01	TCGA-A2-A0EN	tcga_pan_can_atlas_2018	70	T2	2	.	.	LumA	0	134.399	11.1999	0	0:LIVING	33	0.66	1	1	X766_splice	.	.	.	.	.	.	H1047R, H1065L	.	.	.	.	.	.	.	.
TCGA-EW-A1J2-01	TCGA-EW-A1J2	tcga_pan_can_atlas_2018	50	T1	2	.	.	LumA	1	13.2492	1.1041	0	0:LIVING	33	0.66	1	1	K668*	.	.	.	.	.	.	H1047R	.	.	.	.	.	.	.	.
TCGA-AO-A1KS-01	TCGA-AO-A1KS	tcga_pan_can_atlas_2018	69	T2	3	.	.	LumB	0	11.5067	0.958894	0	0:LIVING	33	0.66	1	2	.	HOMDEL	.	.	.	.	.	.	.	.	.	.	.	.	.	.
TCGA-B6-A40C-01	TCGA-B6-A40C	tcga_pan_can_atlas_2018	51	T3	.	.	.	LumA	0	71.1444	5.9287	0	0:LIVING	34	0.68	1	0	Q23*	.	.	.	R329K	.	.	.	.	.	.	.	.	.	.	.
TCGA-B6-A0IP-01	TCGA-B6-A0IP	tcga_pan_can_atlas_2018	74	T1	2	.	.	LumA	0	129.073	10.756	1	1:DECEASED	35	0.7	1	3	H233Rfs*10	.	.	.	.	.	.	R88Q, H1047R, F83L	.	.	.	.	.	AMP	.	.
TCGA-OL-A66N-01	TCGA-OL-A66N	tcga_pan_can_atlas_2018	59	T3	1	.	.	LumA	1	26.0381	2.16984	0	0:LIVING	35	0.7	1	1	K314Hfs*2	.	.	.	.	V777L	.	.	.	.	.	.	.	.	.	.
TCGA-E9-A54Y-01	TCGA-E9-A54Y	tcga_pan_can_atlas_2018	63	T2	3	.	.	LumB	1	23.8354	1.98628	0	0:LIVING	36	0.72	1	2	.	.	.	.	.	.	.	.	.	.	.	.	.	.	G2743D	.
TCGA-B6-A0IH-01	TCGA-B6-A0IH	tcga_pan_can_atlas_2018	81	T3	2	.	.	LumA	1	112.371	9.36428	1	1:DECEASED	37	0.74	1	1	E283_T287del	.	.	.	.	.	.	.	.	.	.	.	.	.	.	.
TCGA-XX-A899-01	TCGA-XX-A899	tcga_pan_can_atlas_2018	46	T1	2	.	.	LumA	1	15.3533	1.27944	0	0:LIVING	37	0.74	1	1	Q511*	.	K164Sfs*10	.	.	.	.	F83S	.	.	.	.	.	.	.	.
TCGA-B6-A2IU-01	TCGA-B6-A2IU	tcga_pan_can_atlas_2018	62	T2	2	.	.	LumA	0	170.168	14.1807	0	0:LIVING	38	0.76	1	3	Q195*	.	.	.	.	.	.	.	.	.	.	.	.	.	.	.
TCGA-A7-A26E-01	TCGA-A7-A26E	tcga_pan_can_atlas_2018	71	T3	3	.	.	LumA	1	31.364	2.61367	0	0:LIVING	38	0.76	1	2	.	.	.	.	.	.	.	E545K	.	.	.	.	.	.	.	.
TCGA-AR-A2LN-01	TCGA-AR-A2LN	tcga_pan_can_atlas_2018	65	T2	2	.	.	LumA	0	38.1694	3.18079	0	0:LIVING	38	0.76	1	1	P127Afs*41	.	.	.	.	.	.	.	.	.	.	.	.	.	.	.
TCGA-AN-A0FN-01	TCGA-AN-A0FN	tcga_pan_can_atlas_2018	61	T1	2	.	.	LumA	0	7.16704	0.597254	0	0:LIVING	39	0.78	1	3	E247Dfs*12	.	.	.	.	.	.	.	.	.	.	.	.	.	.	.
TCGA-A2-A1FV-01	TCGA-A2-A1FV	tcga_pan_can_atlas_2018	74	T3	2	.	.	LumA	0	23.4737	1.95614	0	0:LIVING	39	0.78	1	1	P160Rfs*8	.	.	.	.	.	.	.	.	.	.	.	.	.	.	.
TCGA-BH-A8FY-01	TCGA-BH-A8FY	tcga_pan_can_atlas_2018	87	T1	.	.	.	LumA	0	9.69852	0.80821	1	1:DECEASED	39	0.78	1	0	R108Hfs*56	.	.	.	.	.	.	E545A	.	.	.	.	.	.	.	.
TCGA-AC-A8OS-01	TCGA-AC-A8OS	tcga_pan_can_atlas_2018	71	T2	2	.	.	LumA	0	2.30134	0.191779	0	0:LIVING	40	0.8	1	3	Q647*	.	.	.	.	.	.	H1047L	.	.	.	.	.	.	.	.
TCGA-C8-A8HR-01	TCGA-C8-A8HR	tcga_pan_can_atlas_2018	49	T3	3	.	.	Normal	1	13.4136	1.1178	0	0:LIVING	40	0.8	1	2	.	.	.	.	.	.	.	.	.	.	.	.	.	.	.	.
TCGA-B6-A40B-01	TCGA-B6-A40B	tcga_pan_can_atlas_2018	76	T1	.	.	.	LumA	0	103.626	8.63552	0	0:LIVING	41	0.82	1	0	E494*	.	.	.	.	.	.	E542K	.	.	.	.	.	AMP	.	.
TCGA-B6-A0RQ-01	TCGA-B6-A0RQ	tcga_pan_can_atlas_2018	68	T3	2	.	.	Normal	0	140.283	11.6903	1	1:DECEASED	41	0.82	1	1	Q23*	.	.	.	.	.	.	E542G	.	.	.	.	.	.	.	.
TCGA-EW-A423-01	TCGA-EW-A423	tcga_pan_can_atlas_2018	75	T2	3	.	.	LumA	0	17.5231	1.46026	0	0:LIVING	44	0.88	1	2	V794Pfs*16	.	.	.	.	.	.	H1047R	.	.	.	.	.	AMP	.	.
TCGA-E2-A576-01	TCGA-E2-A576	tcga_pan_can_atlas_2018	69	T1	2	.	.	LumA	0	34.29	2.8575	0	0:LIVING	44	0.88	1	1	G775Afs*8	.	.	.	.	.	.	H1047Y	.	.	.	.	.	.	.	.
TCGA-C8-A3M8-01	TCGA-C8-A3M8	tcga_pan_can_atlas_2018	68	T1	2	.	.	LumB	0	12.9533	1.07944	0	0:LIVING	44	0.88	1	3	.	.	.	.	.	.	.	M1043I	.	.	.	.	.	AMP	.	.
TCGA-A8-A0A1-01	TCGA-A8-A0A1	tcga_pan_can_atlas_2018	84	T2	2	.	.	LumA	0	11.9999	0.999989	0	0:LIVING	45	0.9	1	3	Q307Hfs*2, HOMDEL	.	.	.	.	.	.	E545K	.	.	.	.	.	.	.	.
TCGA-AC-A4ZE-01	TCGA-AC-A4ZE	tcga_pan_can_atlas_2018	63	T3	1	.	.	LumA	0	29.26	2.43833	0	0:LIVING	45	0.9	1	1	X17_splice	.	.	D226G	.	.	.	.	.	.	.	.	.	AMP	.	.
TCGA-OL-A66J-01	TCGA-OL-A66J	tcga_pan_can_atlas_2018	80	T1	2	.	.	LumA	0	65.6212	5.46843	0	0:LIVING	45	0.9	1	1	.	.	.	H247Q	.	.	.	.	.	.	.	.	.	AMP	.	.
TCGA-A8-A09X-01	TCGA-A8-A09X	tcga_pan_can_atlas_2018	62	T2	3	.	.	Her2	1	14.0053	1.16711	1	1:DECEASED	47	0.94	1	2	D291Mfs*3	M246I	.	.	.	.	.	.	.	.	.	.	S587C	.	.	.
TCGA-LL-A9Q3-01	TCGA-LL-A9Q3	tcga_pan_can_atlas_2018	69	T3	3	.	.	LumA	1	17.4902	1.45752	0	0:LIVING	47	0.94	1	2	Q673*	.	.	S250F	.	.	.	G118D	I300Sfs*7	.	.	.	.	.	.	.
TCGA-LL-A6FP-01	TCGA-LL-A6FP	tcga_pan_can_atlas_2018	90	T2	1	.	.	LumA	.	22.2573	1.85477	0	0:LIVING	49	0.98	2	1	T141Rfs*63	.	.	.	.	.	.	E545K	.	.	.	.	.	.	.	.
TCGA-A2-A25D-01	TCGA-A2-A25D	tcga_pan_can_atlas_2018	90	T2	3	.	.	LumA	1	18.1477	1.51231	0	0:LIVING	50	1	2	2	HOMDEL	.	.	.	.	.	.	E110del	.	.	.	.	.	.	.	.
TCGA-E9-A3HO-01	TCGA-E9-A3HO	tcga_pan_can_atlas_2018	49	T2	3	.	.	LumB	0	38.0708	3.17257	0	0:LIVING	53	1.06	2	2	.	.	.	.	.	.	.	.	.	.	.	.	.	.	K437Ifs*22	.
TCGA-PE-A5DD-01	TCGA-PE-A5DD	tcga_pan_can_atlas_2018	64	T2	2	.	.	LumA	0	64.2075	5.35063	0	0:LIVING	54	1.08	2	1	R335*	.	.	.	.	.	.	H1047R	.	.	.	.	.	.	.	.
TCGA-A2-A0YD-01	TCGA-A2-A0YD	tcga_pan_can_atlas_2018	63	T3	2	.	.	LumA	0	25.2819	2.10683	0	0:LIVING	55	1.1	2	1	P339Lfs*17	.	.	.	.	.	.	.	.	.	.	.	.	.	.	.
TCGA-E9-A2JS-01	TCGA-E9-A2JS	tcga_pan_can_atlas_2018	72	T2	3	.	.	LumB	1	29.7202	2.47669	1	1:DECEASED	55	1.1	2	2	.	.	.	.	.	.	.	.	.	.	.	.	.	.	.	.
TCGA-AC-A62Y-01	TCGA-AC-A62Y	tcga_pan_can_atlas_2018	79	T2	2	.	.	LumA	1	17.4245	1.45204	0	0:LIVING	56	1.12	2	1	.	.	.	.	.	.	.	.	N117Kfs*9	.	.	.	.	.	.	.
TCGA-AR-A1AK-01	TCGA-AR-A1AK	tcga_pan_can_atlas_2018	70	T1	2	.	.	LumA	0	103.856	8.6547	0	0:LIVING	56	1.12	2	1	.	.	E195Gfs*32	.	.	.	.	.	.	.	.	.	.	AMP	.	.
TCGA-BH-A8FZ-01	TCGA-BH-A8FZ	tcga_pan_can_atlas_2018	58	T1	.	.	.	Normal	0	18.871	1.57259	0	0:LIVING	56	1.12	2	0	.	.	.	.	.	.	.	.	.	.	.	.	.	.	.	.
TCGA-LL-A5YL-01	TCGA-LL-A5YL	tcga_pan_can_atlas_2018	64	T2	2	.	.	LumA	1	17.0628	1.4219	0	0:LIVING	57	1.14	2	1	.	.	.	.	.	.	T355I	.	.	.	.	.	.	.	.	.
TCGA-AQ-A7U7-01	TCGA-AQ-A7U7	tcga_pan_can_atlas_2018	55	T2	2	.	.	LumA	1	19.1998	1.59998	1	1:DECEASED	58	1.16	2	1	.	.	D159Efs*6	.	.	.	.	E600K	.	.	.	.	.	.	.	.
TCGA-AR-A2LH-01	TCGA-AR-A2LH	tcga_pan_can_atlas_2018	55	T3	2	.	.	Normal	1	20.2518	1.68765	1	1:DECEASED	59	1.18	2	1	.	R273H	.	.	.	.	.	.	.	.	.	.	.	.	.	.
TCGA-OL-A5DA-01	TCGA-OL-A5DA	tcga_pan_can_atlas_2018	61	T2	2	.	.	LumA	0	58.6185	4.88488	0	0:LIVING	61	1.22	2	3	.	.	.	.	.	.	.	E453K	.	.	.	L1872V, AMP	.	.	.	.
TCGA-AN-A0FS-01	TCGA-AN-A0FS	tcga_pan_can_atlas_2018	55	T1	1	.	.	LumA	0	6.90403	0.575336	0	0:LIVING	61	1.22	2	1	.	.	.	.	.	.	.	E545K	.	.	.	.	.	AMP	.	.
TCGA-BH-A0B5-01	TCGA-BH-A0B5	tcga_pan_can_atlas_2018	40	T2	2	.	.	LumA	1	70.2239	5.85199	0	0:LIVING	61	1.22	2	1	.	.	.	.	.	.	.	K111del	.	.	.	.	.	.	.	.
TCGA-Z7-A8R6-01	TCGA-Z7-A8R6	tcga_pan_can_atlas_2018	46	T1	2	.	.	LumB	0	107.045	8.92045	0	0:LIVING	64	1.28	2	3	.	E285K	D160del	.	.	.	.	.	HOMDEL	.	.	.	.	AMP	.	.
TCGA-E2-A1IH-01	TCGA-E2-A1IH	tcga_pan_can_atlas_2018	80	T1	2	.	.	LumA	0	33.7311	2.81093	0	0:LIVING	65	1.3	2	1	P597Efs*11, P607S	.	.	.	.	.	.	.	E73Dfs*25	.	.	.	.	.	.	.
TCGA-HN-A2NL-01	TCGA-HN-A2NL	tcga_pan_can_atlas_2018	56	T2	3	.	.	Basal	0	2.59723	0.216436	0	0:LIVING	70	1.4	2	3	.	.	.	.	.	.	.	.	.	.	.	.	.	.	.	.
TCGA-OL-A6VQ-01	TCGA-OL-A6VQ	tcga_pan_can_atlas_2018	49	T2	3	.	.	LumA	0	19.7258	1.64382	0	0:LIVING	70	1.4	2	2	N315Kfs*6, T560Rfs*5	.	D326*	.	.	.	.	H1047R	.	.	.	.	.	.	.	.
TCGA-EW-A1IW-01	TCGA-EW-A1IW	tcga_pan_can_atlas_2018	80	T2	2	.	.	LumA	1	12.1971	1.01643	0	0:LIVING	79	1.58	2	1	.	.	.	F266I	H405Q	AMP	.	Q546R	.	.	.	.	.	AMP	.	.
TCGA-A8-A09W-01	TCGA-A8-A09W	tcga_pan_can_atlas_2018	70	T2	2	.	.	LumB	1	0.986291	0.0821909	0	0:LIVING	80	1.6	2	3	X646_splice	.	.	.	.	.	.	.	.	.	.	.	.	.	.	.
TCGA-E2-A15M-01	TCGA-E2-A15M	tcga_pan_can_atlas_2018	66	T2	.	.	.	LumA	0	11.0465	0.920538	1	1:DECEASED	81	1.62	2	0	.	L130V	S363W	.	.	.	.	.	.	.	.	.	.	.	.	.
TCGA-AC-A2B8-01	TCGA-AC-A2B8	tcga_pan_can_atlas_2018	84	T3	2	.	.	LumA	0	22.2573	1.85477	0	0:LIVING	83	1.66	2	3	C603del	.	.	.	.	.	.	E545K	.	.	.	.	.	.	.	.
TCGA-E9-A295-01	TCGA-E9-A295	tcga_pan_can_atlas_2018	71	T2	2	.	.	LumA	0	12.3286	1.02739	0	0:LIVING	88	1.76	2	3	.	.	.	.	.	.	.	H1047L	.	.	.	.	.	AMP	.	.
TCGA-PE-A5DC-01	TCGA-PE-A5DC	tcga_pan_can_atlas_2018	72	T2	2	.	.	LumA	1	47.0132	3.91777	1	1:DECEASED	93	1.86	2	1	.	.	.	.	.	.	.	.	.	.	.	.	.	AMP	HOMDEL	.
TCGA-E2-A2P6-01	TCGA-E2-A2P6	tcga_pan_can_atlas_2018	77	T2	2	.	.	LumA	1	34.553	2.87942	0	0:LIVING	104	2.08	2	1	.	.	.	.	.	.	.	.	.	.	.	.	.	AMP	.	.
TCGA-AO-A0J9-01	TCGA-AO-A0J9	tcga_pan_can_atlas_2018	61	T2	3	.	.	LumA	1	53.0296	4.41913	0	0:LIVING	107	2.14	2	2	E518Nfs*4	.	.	.	.	.	.	.	.	.	.	.	.	.	.	.
TCGA-A2-A0SY-01	TCGA-A2-A0SY	tcga_pan_can_atlas_2018	62	T3	2	.	.	LumA	1	44.2844	3.69037	0	0:LIVING	115	2.3	2	1	S19Pfs*38	.	.	H247Y, I450M	.	AMP	.	E545K	.	.	.	.	.	.	.	.
TCGA-AC-A3W5-01	TCGA-AC-A3W5	tcga_pan_can_atlas_2018	65	T2	2	.	.	Her2	0	16.5697	1.38081	0	0:LIVING	117	2.34	2	1	.	HOMDEL	.	.	.	AMP	.	.	.	.	.	.	.	.	.	.
TCGA-D8-A73U-01	TCGA-D8-A73U	tcga_pan_can_atlas_2018	88	T2	2	.	.	LumA	0	16.1752	1.34793	0	0:LIVING	123	2.46	2	1	.	.	.	.	.	.	.	H1047R	.	.	.	.	.	.	.	.
TCGA-D8-A1JN-01	TCGA-D8-A1JN	tcga_pan_can_atlas_2018	80	T3	2	.	.	LumA	1	20.3833	1.69861	0	0:LIVING	124	2.48	2	1	.	.	.	W214C	K357Lfs*2	.	.	E545K	.	.	.	.	.	.	.	.
TCGA-AR-A24H-01	TCGA-AR-A24H	tcga_pan_can_atlas_2018	65	T2	3	.	.	LumB	0	160.897	13.4081	0	0:LIVING	124	2.48	2	2	.	.	.	.	.	AMP	.	.	.	.	.	.	.	.	HOMDEL	AMP
TCGA-C8-A3M7-01	TCGA-C8-A3M7	tcga_pan_can_atlas_2018	60	T4	2	.	.	LumA	0	33.9941	2.83285	1	1:DECEASED	127	2.54	2	1	Y341Vfs*9	.	.	.	.	S305C	.	H1047R	.	.	.	.	.	.	.	.
TCGA-A2-A0CR-01	TCGA-A2-A0CR	tcga_pan_can_atlas_2018	54	T3	2	.	.	LumA	0	107.933	8.99442	0	0:LIVING	134	2.68	2	1	R63*	.	.	.	.	.	.	E542K	.	.	.	P194S	.	.	.	.
TCGA-5L-AAT0-01	TCGA-5L-AAT0	tcga_pan_can_atlas_2018	42	T2	.	.	.	LumA	0	48.5584	4.04653	0	0:LIVING	139	2.78	2	0	Q23*	.	.	.	.	.	.	H1047L	.	.	.	.	.	.	.	.
TCGA-E2-A1LG-01	TCGA-E2-A1LG	tcga_pan_can_atlas_2018	50	T2	.	.	.	Basal	0	50.0707	4.17256	0	0:LIVING	140	2.8	2	0	HOMDEL	I255del	.	.	.	.	.	.	.	.	.	.	.	.	AMP	.
TCGA-GM-A2DO-01	TCGA-GM-A2DO	tcga_pan_can_atlas_2018	54	T1	.	.	.	LumB	0	85.347	7.11225	0	0:LIVING	141	2.82	2	0	D288N	.	.	.	.	.	.	.	.	.	.	.	.	AMP	.	.
TCGA-XX-A89A-01	TCGA-XX-A89A	tcga_pan_can_atlas_2018	68	T3	3	.	.	LumA	0	16.0437	1.33697	0	0:LIVING	151	3.02	2	2	Q129*	.	.	.	.	.	.	E542K	.	.	.	.	.	AMP	.	.
TCGA-A8-A0A7-01	TCGA-A8-A0A7	tcga_pan_can_atlas_2018	57	T2	2	.	.	Her2	1	0.986291	0.0821909	0	0:LIVING	194	3.88	2	3	E243K	.	.	.	.	AMP	AMP	E726K	.	.	.	.	.	.	E3175K	.
TCGA-BH-A0HP-01	TCGA-BH-A0HP	tcga_pan_can_atlas_2018	65	T3	2	.	.	LumA	1	13.6108	1.13423	0	0:LIVING	240	4.8	2	1	X230_splice	.	.	.	M293K	.	.	.	X212_splice	.	.	.	AMP	.	.	.
TCGA-AR-A2LE-01	TCGA-AR-A2LE	tcga_pan_can_atlas_2018	69	T1	2	.	.	LumA	0	166.42	13.8683	0	0:LIVING	256	5.12	3	3	Q255*	.	.	.	.	.	.	.	.	.	.	.	.	.	.	.
TCGA-A2-A25A-01	TCGA-A2-A25A	tcga_pan_can_atlas_2018	44	T2	2	.	.	Normal	0	107.703	8.97524	0	0:LIVING	301	6.02	3	1	R732Q	.	P134S	.	.	.	.	E542K	.	.	.	.	.	.	.	.
TCGA-A2-A0YK-01	TCGA-A2-A0YK	tcga_pan_can_atlas_2018	61	T2	2	.	.	Normal	0	19.3313	1.61094	0	0:LIVING	317	6.34	3	1	R63*	.	.	.	.	.	.	H1047L	.	.	.	.	.	AMP	.	.
TCGA-EW-A1J5-01	TCGA-EW-A1J5	tcga_pan_can_atlas_2018	59	T3	2	.	.	LumA	0	15.682	1.30683	0	0:LIVING	364	7.28	3	1	F499Lfs*38	.	.	D226G	.	.	.	E545K, E726K	.	.	.	.	.	AMP	.	.
TCGA-PE-A5DE-01	TCGA-PE-A5DE	tcga_pan_can_atlas_2018	41	T2	2	.	.	LumA	0	86.958	7.2465	0	0:LIVING	389	7.78	3	1	G278V	M169I	.	.	.	.	.	E545K	.	.	.	.	H254Y	.	.	E1419K
TCGA-AC-A5XS-01	TCGA-AC-A5XS	tcga_pan_can_atlas_2018	74	T2	2	.	.	LumA	0	19.3313	1.61094	0	0:LIVING	401	8.02	3	1	L731Gfs*38	.	.	.	.	.	.	E545G, E545K, C378F	.	.	.	.	.	.	.	.
TCGA-BH-A2L8-01	TCGA-BH-A2L8	tcga_pan_can_atlas_2018	45	T2	2	.	.	LumA	0	20.1203	1.67669	0	0:LIVING	423	8.46	3	3	.	.	.	S250F	M293K, E262K	.	.	G1049R	S287*	.	.	S2326F	.	.	.	D1578H
TCGA-D8-A27G-01	TCGA-D8-A27G	tcga_pan_can_atlas_2018	75	T2	2	.	.	LumA	0	13.4464	1.12054	0	0:LIVING	813	16.26	4	1	G169Rfs*5	.	.	.	.	I767M, AMP	.	H1047R	.	.	.	.	.	AMP	E2175Q	.
TCGA-A8-A09Z-01	TCGA-A8-A09Z	tcga_pan_can_atlas_2018	83	T3	3	.	.	LumB	0	0	0	0	0:LIVING	1097	21.94	4	2	P127Afs*41	.	.	.	W328Efs*23	.	L1231P, M1249I	.	K267Rfs*9	.	.	.	.	.	.	.
TCGA-D8-A27V-01	TCGA-D8-A27V	tcga_pan_can_atlas_2018	62	T2	2	.	.	LumA	0	12.5259	1.04382	0	0:LIVING	3081	61.62	4	1	Q23*	.	.	.	.	G621Afs*31	.	.	F347L	.	.	.	V77Cfs*18	.	K936Nfs*24	.
TCGA-C8-A9FZ-01	TCGA-C8-A9FZ	tcga_pan_can_atlas_2018	49	.	1	.	.	.	.	.	.	.	.	.	.	.	7	.	.	.	S217C	.	AMP	.	.	.	.	.	.	.	.	.	AMP
TCGA-A7-A0CG-01	TCGA-A7-A0CG	tcga_pan_can_atlas_2018	62	.	1	.	.	.	.	.	.	.	.	.	.	.	3	.	.	.	.	.	.	.	H1047R	.	.	.	.	.	.	.	.
TCGA-B6-A0IE-01	TCGA-B6-A0IE	tcga_pan_can_atlas_2018	54	.	2	.	.	.	.	.	.		.	.	.	.	3	.	X307_splice	.	.	.	.	.	H1047R	.	.	.	.	.	.	.	.
TCGA-EW-A1IX-01	TCGA-EW-A1IX	tcga_pan_can_atlas_2018	80	.	1	.	.	.	.	.	.		.	.	.	.	3	.	.	.	.	.	.	.	H1047R	.	.	.	.	.	.	.	.
TCGA-S3-A6ZG-01	TCGA-S3-A6ZG	tcga_pan_can_atlas_2018	41	.	2	.	.	.	.	.	.		.	.	.	.	3	G352Rfs*2	.	.	.	.	.	.	.	.	.	.	.	.	AMP	.	.
TCGA-A7-A13H-01	TCGA-A7-A13H	tcga_pan_can_atlas_2018	61	T2	1	.	.	.	1	29.5558	2.46299	0	0:LIVING	NA	.	.	3	.	.	.	.	.	.	.	.	HOMDEL	.	.	.	.	.	.	.
TCGA-A7-A4SB-01	TCGA-A7-A4SB	tcga_pan_can_atlas_2018	56	T3	2	.	.	.	1	13.7423	1.14519	0	0:LIVING	NA	.	.	3	.	.	.	.	.	.	.	.	.	.	.	.	.	AMP	.	.
TCGA-AC-A2FM-01	TCGA-AC-A2FM	tcga_pan_can_atlas_2018	87	T2	2	.	.	.	1	26.0381	2.16984	1	1:DECEASED	NA	.	.	3	.	.	.	.	.	.	.	.	.	.	.	.	.	.	.	.
TCGA-AC-A3EH-01	TCGA-AC-A3EH	tcga_pan_can_atlas_2018	79	T3	2	.	.	.	1	6.47664	0.53972	1	1:DECEASED	NA	.	.	3	.	.	.	.	.	.	.	.	.	.	.	.	.	.	.	.
TCGA-AC-A3TM-01	TCGA-AC-A3TM	tcga_pan_can_atlas_2018	50	T3	2	.	.	.	1	25.0518	2.08765	0	0:LIVING	NA	.	.	3	.	.	.	.	.	.	.	.	.	.	.	.	.	.	.	.
TCGA-AR-A2LJ-01	TCGA-AR-A2LJ	tcga_pan_can_atlas_2018	40	T3	2	.	.	.	1	86.5306	7.21088	0	0:LIVING	.	.	.	3	.	.	.	.	.	AMP	.	.	.	.	.	.	.	AMP	.	.
TCGA-E2-A3DX-01	TCGA-E2-A3DX	tcga_pan_can_atlas_2018	43	T2	2	.	.	.	1	43.5612	3.6301	0	0:LIVING	NA	.	.	3	.	.	.	.	.	.	.	.	.	.	.	.	.	.	.	.
TCGA-E9-A3Q9-01	TCGA-E9-A3Q9	tcga_pan_can_atlas_2018	78	T3	2	.	.	.	1	32.9092	2.74244	0	0:LIVING	NA	.	.	3	.	.	.	.	.	.	.	.	.	.	.	.	.	.	.	.
TCGA-GM-A3XG-01	TCGA-GM-A3XG	tcga_pan_can_atlas_2018	46	T3	2	.	.	.	1	43.7255	3.6438	0	0:LIVING	NA	.	.	3	.	.	.	.	.	.	.	.	.	.	.	.	.	.	.	.
TCGA-E2-A2P5-01	TCGA-E2-A2P5	tcga_pan_can_atlas_2018	78	T2	3	.	.	.	1	26.9915	2.24929	1	1:DECEASED	NA	.	.	2	.	.	.	.	.	.	.	.	.	.	.	.	.	.	.	.
TCGA-EW-A424-01	TCGA-EW-A424	tcga_pan_can_atlas_2018	51	T3	3	.	.	.	1	23.5066	1.95888	0	0:LIVING	NA	.	.	2	.	.	.	.	.	.	.	.	.	.	.	.	.	.	.	.
TCGA-JL-A3YW-01	TCGA-JL-A3YW	tcga_pan_can_atlas_2018	49	T2	3	.	.	.	1	11.8355	0.986291	0	0:LIVING	NA	.	.	2	.	.	.	.	.	.	.	.	.	.	.	.	.	.	.	.
TCGA-MS-A51U-01	TCGA-MS-A51U	tcga_pan_can_atlas_2018	44	T2	3	.	.	.	1	22.3888	1.86573	0	0:LIVING	NA	.	.	2	.	.	.	.	.	.	.	.	.	.	.	.	.	.	.	.
TCGA-A1-A0SE-01	TCGA-A1-A0SE	tcga_pan_can_atlas_2018	42	.	2	.	.	.	.	.	.	.	.	.	.	.	1	E243K	.	.	.	.	.	.	.	.	.	.	.	.	AMP	.	.
TCGA-A2-A0CO-01	TCGA-A2-A0CO	tcga_pan_can_atlas_2018	85	T3	2	.	.	.	0	114.804	9.56702	1	1:DECEASED	NA	.	.	1	.	.	.	.	.	.	.	.	.	.	.	.	.	.	.	.
TCGA-B6-A0RV-01	TCGA-B6-A0RV	tcga_pan_can_atlas_2018	68	.	2	.	.	.	.	.	.		.	.	.	.	1	.	.	.	.	.	.	.	.	.	.	.	.	.	.	.	.
TCGA-B6-A0WX-01	TCGA-B6-A0WX	tcga_pan_can_atlas_2018	68	.	2	.	.	.	.	.	.		.	.	.	.	1	.	R248W, L114*	.	.	.	.	.	.	.	.	.	.	.	.	.	.
TCGA-B6-A0X7-01	TCGA-B6-A0X7	tcga_pan_can_atlas_2018	68	.	2	.	.	.	.	.	.		.	.	.	.	1	K675Nfs*2	.	.	.	.	.	.	H1047R	.	.	.	.	.	.	.	.
TCGA-BH-A0BA-01	TCGA-BH-A0BA	tcga_pan_can_atlas_2018	40	.	2	.	.	.	.	.	.		.	.	.	.	1	P260H	.	.	.	.	.	.	H1047R	.	.	.	.	.	.	.	.
TCGA-BH-A0C3-01	TCGA-BH-A0C3	tcga_pan_can_atlas_2018	61	.	2	.	.	.	.	.	.		.	.	.	.	1	.	G187S	.	.	.	.	.	.	.	.	.	.	.	AMP	.	.
TCGA-BH-A0HK-01	TCGA-BH-A0HK	tcga_pan_can_atlas_2018	53	.	2	.	.	.	.	.	.		.	.	.	.	1	.	.	.	I176M	.	.	.	.	.	.	.	.	.	AMP	.	.
TCGA-E2-A1BC-01	TCGA-E2-A1BC	tcga_pan_can_atlas_2018	46	.	2	.	.	.	.	.	.		.	.	.	.	1	.	.	.	.	.	.	.	H1047R	.	.	.	.	.	.	.	.
TCGA-LD-A74U-01	TCGA-LD-A74U	tcga_pan_can_atlas_2018	44	.	2	.	.	.	.	.	.		.	.	.	.	1	N238*	R280K	.	.	.	.	.	E545K, C420R	.	.	.	.	.	.	E3167Q	.
TCGA-LD-A7W6-01	TCGA-LD-A7W6	tcga_pan_can_atlas_2018	44	.	2	.	.	.	.	.	.		.	.	.	.	1	Q23*	.	.	.	.	.	.	.	.	.	.	.	.	AMP	.	.
TCGA-A2-A3KC-01	TCGA-A2-A3KC	tcga_pan_can_atlas_2018	55	T2	2	.	.	.	1	36.2297	3.01914	0	0:LIVING	NA	.	.	1	.	.	.	.	.	.	.	.	.	.	.	.	.	AMP	.	.
TCGA-A2-A4RW-01	TCGA-A2-A4RW	tcga_pan_can_atlas_2018	49	T2	2	.	.	.	1	7.29855	0.608213	0	0:LIVING	NA	.	.	1	CDH1-NADK2, NADK2-CDH1	.	.	.	.	.	.	.	HOMDEL	.	.	.	.	.	.	.
TCGA-A2-A4RY-01	TCGA-A2-A4RY	tcga_pan_can_atlas_2018	46	T3	2	.	.	.	1	21.3039	1.77532	0	0:LIVING	NA	.	.	1	.	.	.	.	.	.	.	.	.	.	.	.	.	.	.	.
TCGA-A7-A3IZ-01	TCGA-A7-A3IZ	tcga_pan_can_atlas_2018	62	T2	2	.	.	.	0	10.5862	0.882182	0	0:LIVING	NA	.	.	1	.	.	TBX3-BIK	.	.	.	.	.	.	.	.	.	.	.	.	.
TCGA-A7-A3J1-01	TCGA-A7-A3J1	tcga_pan_can_atlas_2018	63	T1	2	.	.	.	0	11.2766	0.939716	0	0:LIVING	NA	.	.	1	.	.	.	.	.	.	.	.	.	.	.	.	.	.	.	.
TCGA-A7-A426-01	TCGA-A7-A426	tcga_pan_can_atlas_2018	50	T3	2	.	.	.	1	11.967	0.997249	0	0:LIVING	NA	.	.	1	.	.	.	.	.	.	.	.	.	.	.	.	.	.	.	.
TCGA-A7-A4SA-01	TCGA-A7-A4SA	tcga_pan_can_atlas_2018	40	T2	2	.	.	.	1	14.9259	1.24382	0	0:LIVING	NA	.	.	1	.	.	.	.	.	.	.	.	HOMDEL	.	.	.	.	.	.	.
TCGA-AC-A23G-01	TCGA-AC-A23G	tcga_pan_can_atlas_2018	76	T1	2	.	.	.	1	73.906	6.15884	0	0:LIVING	NA	.	.	1	.	.	.	.	.	.	.	.	.	.	.	.	.	.	.	.
TCGA-AC-A2QI-01	TCGA-AC-A2QI	tcga_pan_can_atlas_2018	76	T3	1	.	.	.	1	19.3313	1.61094	0	0:LIVING	NA	.	.	1	.	.	.	.	.	.	.	.	.	.	.	.	.	.	.	.
TCGA-AC-A3BB-01	TCGA-AC-A3BB	tcga_pan_can_atlas_2018	46	T3	2	.	.	.	1	32.449	2.70408	0	0:LIVING	NA	.	.	1	.	.	.	.	.	.	.	.	.	.	.	.	.	.	.	.
TCGA-AC-A3W6-01	TCGA-AC-A3W6	tcga_pan_can_atlas_2018	90	T3	2	.	.	.	1	19.7916	1.6493	0	0:LIVING	NA	.	.	1	.	.	.	.	.	.	.	.	.	.	.	.	.	.	.	.
TCGA-AC-A3W7-01	TCGA-AC-A3W7	tcga_pan_can_atlas_2018	66	T2	2	.	.	.	1	15.4848	1.2904	0	0:LIVING	NA	.	.	1	.	.	.	.	.	.	.	.	.	.	.	.	.	.	.	.
TCGA-AR-A1AM-01	TCGA-AR-A1AM	tcga_pan_can_atlas_2018	52	T3	2	.	.	.	1	98.3332	8.19443	0	0:LIVING	.	.	.	1	.	.	.	.	.	.	.	.	.	.	.	.	.	.	.	.
TCGA-BH-A28O-01	TCGA-BH-A28O	tcga_pan_can_atlas_2018	50	T3	1	.	.	.	1	36.8215	3.06846	0	0:LIVING	.	.	.	1	.	.	.	.	.	.	.	.	.	.	.	.	.	.	.	.
TCGA-BH-A42T-01	TCGA-BH-A42T	tcga_pan_can_atlas_2018	75	T2	2	.	.	.	0	10.5204	0.876703	1	1:DECEASED	NA	.	.	1	.	.	.	.	.	AMP	.	.	.	.	.	.	.	AMP	.	AMP
TCGA-E2-A14U-01	TCGA-E2-A14U	tcga_pan_can_atlas_2018	74	T1	2	.	.	.	0	43.331	3.61092	0	0:LIVING	NA	.	.	1	.	.	.	.	.	.	.	.	.	.	.	.	.	.	.	.
TCGA-EW-A3E8-01	TCGA-EW-A3E8	tcga_pan_can_atlas_2018	60	T3	2	.	.	.	0	34.027	2.83559	0	0:LIVING	NA	.	.	1	.	.	.	.	.	.	.	.	.	.	.	.	.	.	.	.
TCGA-GM-A3NY-01	TCGA-GM-A3NY	tcga_pan_can_atlas_2018	72	T2	2	.	.	.	1	38.2023	3.18353	0	0:LIVING	NA	.	.	1	.	.	.	.	.	.	.	.	.	.	.	.	.	.	.	.
TCGA-GM-A3XN-01	TCGA-GM-A3XN	tcga_pan_can_atlas_2018	44	T1	2	.	.	.	1	66.3774	5.53145	0	0:LIVING	NA	.	.	1	.	.	.	.	.	.	.	.	.	.	.	.	.	.	.	.
TCGA-LQ-A4E4-01	TCGA-LQ-A4E4	tcga_pan_can_atlas_2018	73	T3	2	.	.	.	1	27.912	2.326	0	0:LIVING	NA	.	.	1	.	.	.	.	.	.	.	.	.	.	.	.	.	.	.	.
TCGA-E9-A1N4-01	TCGA-E9-A1N4	tcga_pan_can_atlas_2018	69	.	.	.	.	.	.	.	.		.	.	.	.	0	.	.	.	.	.	.	.	.	.	.	.	.	.	.	.	.
TCGA-AC-A2FE-01	TCGA-AC-A2FE	tcga_pan_can_atlas_2018	62	T3	1	.	.	.	1	86.6621	7.22184	1	1:DECEASED	.	.	.	0	.	.	.	.	.	.	.	.	.	.	.	.	.	.	.	.
TCGA-AC-A3TN-01	TCGA-AC-A3TN	tcga_pan_can_atlas_2018	75	T3	1	.	.	.	0	14.9916	1.2493	0	0:LIVING	NA	.		4	.	.	.	.	.	.	.	.	.	.	.	.	.	.	.	.

## Sheet: Table S2_Contigency
		TMB		TP53 status		ERBB2 status		CDH1 status		PIK3CA status		PAM50
Combined cohorts		Low (1-9 mut/MB)	High (10+ mut/MB)	Altered	None reported	Altered	None reported	Altered	None reported	Altered	None reported	LumA	LumB	Basal	HER2	Claudin-Low	Normal-like
	ER pos	133; 94%	8; 6%	41; 8%	488; 92%	32; 6%	497; 94%	325; 61%	204; 39%	235; 44%	294; 56%	436; 86%	34; 7%	0; 0%	6; 1%	7; 1%	23; 5%
	ER neg	10; 77%	3; 23%	9; 37%	15; 63%	6; 25%	18; 75%	8; 33%	16; 67%	9; 37%	15; 63%	6; 29%	2; 10%	4; 19%	8; 38%	1; 5%	0; 0%
	TNBC	11; 85%	2; 15%	12; 44%	15; 56%	5; 19%	22; 81%	15; 56%	12; 44%	10; 37%	17; 63%	1; 9%	0; 0%	2; 18%	3; 27%	4; 37%	1; 9%
	P value	P=0.0460		P<0.00000001		P=0.0002		P=0.0204		P=0.6150		P<0.00000001
	Grade 1	28; 100%	0; 0%	1; 1%	74; 99%	7; 9%	68; 91%	41; 55%	34; 45%	39; 52%	36: 48%	63; 88%	0; 0%	0; 0%	1; 1%	3; 4%	5; 7%
	Grade 2	198; 97%	6; 3%	36; 7%	469: 93%	34; 7%	471; 93%	322; 64%	183; 36%	229; 45%	276; 55%	418; 88%	17; 4%	0; 0%	10; 2%	5; 1%	24; 5%
	Grade 3	73; 89%	9; 11%	34; 23%	111; 77%	21; 14%	124; 86%	81; 56%	64; 44%	53; 37%	92; 63%	76; 63%	26; 21%	5; 4%	8; 7%	3; 2%	4; 3%
	P value	P=0.0073		P<0.00000001		P=0.0128		P=0.1062		P=0.0622		P<0.00000001
		TMB		TP53 status		ERBB2 status		CDH1 status		PIK3CA status		PAM50^
Panel only (MB and EURO ILC)		Low (1-9 mut/MB)	High (10+ mut/MB)	Altered	None reported	Altered	None reported	Altered	None reported	Altered	None reported	LumA	LumB	Basal	HER2	Claudin-Low	Normal-like
	ER pos	516; 98%	13; 2%	497; 92%	42; 8%	41; 8%	498; 92%	214; 40%	325; 60%	304; 56%	235; 44%	63; 51%	22; 18%	0; 0%	6; 5%	9; 7%	24; 19%
	ER neg	21; 88%	3; 12%	15; 62%	9; 38%	9; 38%	15; 62%	16; 67%	8; 33%	15; 62%	9; 38%	0; 0%	0; 0%	0; 0%	5; 83%	1; 17%	0; 0%
	TNBC	25; 93%	2; 7%	17; 59%	12; 41%	6; 21%	23; 79%	14; 48%	15; 52%	19; 66%	10; 34%	1; 7%	0; 0%	4; 27%	3; 20%	5; 33%	2; 13%
	P value	P=0.0089		P<0.00000001		P=0.00000066		P=0.0233		P=0.54		P<0.00000001
	Grade 1	63; 100%	0; 0%	0; 0%	64; 100%	5; 8%	59; 92%	35; 55%	29; 45%	33; 52%	31; 48%	6; 43%	0; 0%	0; 0%	1; 7%	3; 21%	4; 29%
	Grade 2	393; 98%	6; 2%	30; 7%	377; 93%	31; 8%	376; 92%	251; 62%	156; 38%	177; 43%	230; 57%	38; 48%	10; 13%	0; 0%	6; 8%	8; 10%	17; 21%
	Grade 3	109; 92%	9; 8%	33; 27%	88; 73%	22; 18%	99; 82%	63; 52%	58; 48%	43; 36%	78; 64%	17; 40%	10; 23%	4; 9%	6; 14%	3; 7%	3; 7%
	P value	P=0.0004		P<0.00000001		P=0.0024		P=0.1290		P=0.0957		P=0.0187
		TMB		TP53 status		ERBB2 status		CDH1 status		PIK3CA status		PAM50^
		Low (1-9 mut/MB)	High (10+ mut/MB)	Altered	None reported	Altered	None reported	Altered	None reported	Altered	None reported	LumA	LumB	Basal	HER2	Claudin-Low	Normal-like
Exome only (TCGA)	ER pos	-	-	-	-	-	-	-	-	-	-	-	-	-	-	-	-
	ER neg	-	-	-	-	-	-	-	-	-	-	-	-	-	-	-	-
	TNBC	-	-	-	-	-	-	-	-	-	-	-	-	-	-	-	-
	P value
	Grade 1	11; 100%	0; 0%	1; 6%	17; 94%	2; 11%	16; 89%	6; 33%	12; 67%	8; 44%	10; 56%	9; 90%	0; 0%	0; 0%	0; 0%	-	1; 10%
	Grade 2	104; 98%	2; 2%	10; 7%	136; 93%	14; 10%	132; 90%	78; 53%	68; 47%	57; 39%	89; 61%	92; 88%	3; 3%	0; 0%	2; 2%	-	8; 7%
	Grade 3	26; 96%	1; 4%	2; 6%	29; 94%	3; 10%	28; 90%	18; 58%	13; 42%	10; 32%	21; 68%	16; 59%	7; 26%	1; 4%	1; 4%	-	2; 7%
	P value	P=0.7402		P=0.9773		P=0.9790		P=0.2141		P=0.6713		P=0.0023

## Sheet: Table S3_WGS
Study	sample_name	donor_gender	donor_age_at_diagnosis	donor_age_at_last_follow-up	specimen_type	donor_vital_status	disease_status_last_follow-up	donor_relapse_interval__in_DAYS	donor_survival_time_in_DAYS	donor_interval_of_last_follow-up_in_DAYS	tumour_grade	T_stage	N_stage	M_stage	known_germline_mutations	sample_removed_pre_or_post-treatment	source_of_normal	%_tumour_cellularity	smoking.history	other.exposure	parity	age_at_birth_of_first_child_(years)	oral_contraception_exposure	oral_contraception_years	menopausal_status_at_diagnosis	HRT_history_years	number_of_positive_lymph_nodes	DCIS_Grade	Histopathological_subtype	tubule_score	pleomorphism_score	mitotic_score	total_mitoses	grade	Lymphovascular_invasion	Lymphocyte_infiltration	tumour_border	Central_scar/fibrosis	Necrosis	%_Invasive_tumour	%_CIS	%_Stroma	%_Lymphocytes	%_Adipose_tissue	%_Normal_epithelium	final.ER	final.PR	final.HER2	IHC subtypes
560	PD11767	female	50	50	tumour_primary	alive	complete_remission	not_applicable	not_applicable	30	III	Tx	Nx	Mx	no_data_supplied	pre	skin	70	unknown	none.reported	GxP2	32	no	0	pre	0	0	0	Pleomorphic ILC	3	3	1	5	2	absent	mild	infiltrative	absent	absent	no_data_supplied	no_data_supplied	no_data_supplied	no_data_supplied	no_data_supplied	no_data_supplied	positive	positive	negative	Luminal
560	PD9578	female	49	52	tumour_primary	alive	complete_remission	not_applicable	no_data_supplied	1115	II	T2	N0	Mx	no_data_supplied	pre	adjacent_breast_tissue	no_data_supplied	never	none.reported	GxP0	not_applicable	no	0	pre	0	0	0	ILC	3	2	1	1	2	absent	mild	infiltrative	absent	absent	60	10	20	10	0	0	positive	positive	negative	Luminal
560	PD9589	female	42	44	tumour_primary	alive	complete_remission	not_applicable	no_data_supplied	870	II	T1	N0	Mx	no_data_supplied	pre	adjacent_breast_tissue	no_data_supplied	never	none.reported	G2P2	28	yes	18	pre	0	0	0	ILC	3	2	1	4	2	absent	nil	infiltrative	absent	absent	70	10	15	0	0	5	positive	positive	negative	Luminal
560	PD4194	female	43	no_data_supplied	tumour_primary	no_data_supplied	no_data_supplied	no_data_supplied	no_data_supplied	no_data_supplied	II	T1	N0	Mx	no_data_supplied	pre	blood	no_data_supplied	unknown	none.reported	GxP1	no_data_supplied	not.known	no_data_supplied	post	no_data_supplied	0	no_data_supplied	ILC	no_data_supplied	no_data_supplied	no_data_supplied	no_data_supplied	no_data_supplied	no_data_supplied	no_data_supplied	no_data_supplied	no_data_supplied	no_data_supplied	no_data_supplied	no_data_supplied	no_data_supplied	no_data_supplied	no_data_supplied	no_data_supplied	positive	positive	positive	Luminal/HER2+
560	PD8618	female	48	50	tumour_primary	alive	complete_remission	not_applicable	no_data_supplied	737	II	T3	N1	Mx	no_data_supplied	pre	adjacent_breast_tissue	no_data_supplied	ever	none.reported	G2P2	17	yes	2	pre	0	1	0	ILC	3	2	1	1	2	absent	mild	infiltrative	absent	absent	70	10	20	0	0	0	positive	positive	negative	Luminal
560	PD9067	female	50	53	tumour_local_recurrence	alive	complete_remission	not_applicable	no_data_supplied	1250	II	T1	N3	Mx	no_data_supplied	pre	blood	no_data_supplied	never	none.reported	G2P2	31	no	0	pre	0	12	0	ILC	3	2	1	1	2	absent	mild	infiltrative	absent	absent	70	0	20	0	0	10	positive	positive	negative	Luminal
560	PD9593	female	45	48	tumour_primary	alive	no_data_supplied	no_data_supplied	no_data_supplied	865	II	T2	N1	Mx	BRCA1/2.screen.negative	pre	blood	no_data_supplied	never	none.reported	G3P2	31	yes	7	pre	0	1	0	ILC	3	2	1	4	2	absent	mild	infiltrative	absent	absent	80	0	10	0	0	10	positive	positive	negative	Luminal
560	PD18756	female	56	no_data_supplied	tumour_primary	no_data_supplied	no_data_supplied	no_data_supplied	no_data_supplied	no_data_supplied	II	Tx	Nx	Mx	no_data_supplied	pre	blood	80	unknown	none.reported	GxPx	no_data_supplied	not.known	no_data_supplied	no_data_supplied	no_data_supplied	no_data_supplied	no_data_supplied	ILC	no_data_supplied	no_data_supplied	no_data_supplied	no_data_supplied	no_data_supplied	no_data_supplied	no_data_supplied	no_data_supplied	no_data_supplied	no_data_supplied	no_data_supplied	no_data_supplied	no_data_supplied	no_data_supplied	no_data_supplied	no_data_supplied	positive	positive	negative	Luminal
560	PD9755	female	64	66	tumour_primary	alive	complete_remission	not_applicable	no_data_supplied	no_data_supplied	II	T1	N0	Mx	no_data_supplied	pre	blood	97	unknown	none.reported	G2P2	no_data_supplied	not.known	no_data_supplied	post	no_data_supplied	0	no_data_supplied	ILC	no_data_supplied	no_data_supplied	no_data_supplied	no_data_supplied	no_data_supplied	no_data_supplied	no_data_supplied	no_data_supplied	no_data_supplied	no_data_supplied	80	0	20	0	0	0	positive	positive	positive	Luminal/HER2+
560	PD11769	female	44	46	tumour_primary	alive	complete_remission	not_applicable	not_applicable	810	no_data_supplied	Tx	Nx	Mx	no_data_supplied	pre	skin	75	unknown	none.reported	G4P2	33	no	0	pre	0	15	0	Pleomorphic ILC	3	3	3	50	3	absent	nil	infiltrative	absent	absent	no_data_supplied	no_data_supplied	no_data_supplied	no_data_supplied	no_data_supplied	no_data_supplied	positive	positive	negative	Luminal
560	PD14442	female	over_80	91	tumour_primary	alive	complete_remission	not_applicable	no_data_supplied	57	II	T2	N0	M0	no_data_supplied	pre	adjacent_breast_tissue	60	unknown	none.reported	GxP1	no_data_supplied	not.known	no_data_supplied	post	no_data_supplied	0	no_data_supplied	ILC	no_data_supplied	no_data_supplied	no_data_supplied	no_data_supplied	no_data_supplied	no_data_supplied	no_data_supplied	no_data_supplied	no_data_supplied	no_data_supplied	no_data_supplied	no_data_supplied	no_data_supplied	no_data_supplied	no_data_supplied	no_data_supplied	positive	positive	negative	Luminal
560	PD6016	female	43	46	tumour_primary	alive	complete_remission	not_applicable	no_data_supplied	no_data_supplied	II	T3	N0	Mx	no_data_supplied	pre	blood	75	unknown	none.reported	G1P2	no_data_supplied	not.known	no_data_supplied	pre	0	0	0	ILC	3	2	1	5	2	absent	mild	infiltrative	present	absent	60	0	10	20	0	10	positive	positive	negative	Luminal
560	PD13416	female	53	55	tumour_primary	alive	complete_remission	not_applicable	not_applicable	723	II	T1	N0	M0	no_data_supplied	pre	skin	70	ever	none.reported	G6P2	32	not.known	no_data_supplied	pre	0	0	0	ILC	3	2	1	0	2	absent	mild	infiltrative	absent	absent	84	5	5	5	0	1	positive	positive	negative	Luminal
560	PD11765	female	59	63	tumour_primary	alive	complete_remission	not_applicable	not_applicable	540	no_data_supplied	Tx	Nx	Mx	no_data_supplied	pre	skin	75	unknown	none.reported	G5P4	no_data_supplied	no	0	post	0	0	0	ILC	3	2	1	1	2	absent	nil	infiltrative	absent	absent	no_data_supplied	no_data_supplied	no_data_supplied	no_data_supplied	no_data_supplied	no_data_supplied	positive	positive	negative	Luminal
560	PD4985	female	69	no_data_supplied	tumour_primary	no_data_supplied	no_data_supplied	no_data_supplied	no_data_supplied	704	II	Tx	Nx	Mx	no_data_supplied	pre	blood	no_data_supplied	unknown	none.reported	GxP5	no_data_supplied	yes	Yes_unspecified_time	post	no_data_supplied	0	0	ILC	3	2	1	2	2	absent	nil	pushing_>50%	absent	absent	95	0	5	0	0	0	positive	positive	negative	Luminal
560	PD9600	female	58	60	tumour_primary	alive	complete_remission	not_applicable	no_data_supplied	935	II	T4	N2	Mx	no_data_supplied	pre	blood	no_data_supplied	ever	none.reported	GxP0	not_applicable	yes	1	post	0	4	0	ILC	3	2	1	1	2	absent	mild	infiltrative	absent	absent	70	0	15	0	0	15	positive	positive	negative	Luminal
560	PD13306	female	67	no_data_supplied	tumour_primary	no_data_supplied	no_data_supplied	no_data_supplied	no_data_supplied	no_data_supplied	II	T2	N1	Mx	no_data_supplied	pre	blood	no_data_supplied	unknown	none.reported	GxPx	no_data_supplied	not.known	no_data_supplied	no_data_supplied	no_data_supplied	2	0	ILC	3	2	1	1	2	absent	mild	infiltrative	absent	absent	60	0	30	0	0	10	positive	positive	negative	Luminal
560	PD11347	female	52	no_data_supplied	tumour_primary	no_data_supplied	no_data_supplied	no_data_supplied	no_data_supplied	no_data_supplied	no_data_supplied	Tx	Nx	Mx	no_data_supplied	no_data_supplied	no_data_supplied	no_data_supplied	unknown	none.reported	GxP3	no_data_supplied	not.known	no_data_supplied	no_data_supplied	no_data_supplied	no_data_supplied	no_data_supplied	ILC	no_data_supplied	no_data_supplied	no_data_supplied	no_data_supplied	no_data_supplied	no_data_supplied	no_data_supplied	no_data_supplied	no_data_supplied	no_data_supplied	no_data_supplied	no_data_supplied	no_data_supplied	no_data_supplied	no_data_supplied	no_data_supplied	positive	positive	positive	Luminal/HER2+
560	PD8828	female	74	78	tumour_primary	alive	complete_remission	not_applicable	no_data_supplied	1135	III	T2	N1	M0	no_data_supplied	pre	blood	no_data_supplied	unknown	none.reported	G0P0	not_applicable	not.known	no_data_supplied	post	no_data_supplied	1	0	ILC	3	3	1	2	2	absent	severe	infiltrative	absent	absent	60	5	30	0	0	5	positive	negative	negative	Luminal
560	PD13770	female	63	67	tumour_primary	alive	complete_remission	not_applicable	not_applicable	1356	II	Tx	Nx	Mx	no_data_supplied	pre	adjacent_breast_tissue	75	never	none.reported	G1P1	no_data_supplied	not.known	no_data_supplied	post	0	3	0	ILC	3	2	2	7	2	present	mild	infiltrative	absent	absent	75	0	15	5	0	5	positive	positive	negative	Luminal
560	PD7238	female	57	62	tumour_primary	deceased	complete_remission	not_applicable	no_data_supplied	1845	III	T3	N0	M0	BRCA1/2.screen.negative	post	blood	70	unknown	none.reported	G2P2	no_data_supplied	not.known	no_data_supplied	post	no_data_supplied	0	0	ILC	3	1	1	0	1	absent	nil	infiltrative	absent	absent	80	0	5	0	5	10	positive	positive	negative	Luminal
560	PD5961	female	47	49	tumour_primary	deceased	progression	553	1117	1074	I	T3	N1	MX	no_data_supplied	pre	blood	no_data_supplied	never	none.reported	G2P2	39	not.known	no_data_supplied	no_data_supplied	no_data_supplied	12	0	ILC	3	2	1	1	2	no_data_supplied	no_data_supplied	no_data_supplied	no_data_supplied	no_data_supplied	70	0	20	0	0	10	positive	positive	negative	Luminal
560	PD11740	female	43	59	tumour_primary	alive	complete_remission	not_applicable	not_applicable	6500	no_data_supplied	Tx	Nx	Mx	no_data_supplied	post	skin	70	unknown	none.reported	G3P3	30	no	0	post	0	6	0	Pleomorphic ILC	3	3	1	8	2	absent	nil	infiltrative	absent	absent	no_data_supplied	no_data_supplied	no_data_supplied	no_data_supplied	no_data_supplied	no_data_supplied	positive	positive	negative	Luminal
560	PD13763	female	over_80	88	tumour_primary	alive	complete_remission	not_applicable	not_applicable	1376	III	Tx	Nx	Mx	no_data_supplied	pre	adjacent_breast_tissue	70	unknown	none.reported	GxPx	no_data_supplied	not.known	no_data_supplied	post	no_data_supplied	13	0	ILC	3	1	1	2	1	absent	mild	infiltrative	absent	present	70	0	20	5	0	5	positive	positive	negative	Luminal
560	PD6044	female	76	78	tumour_primary	deceased	progression	715	781	755	II	Tx	Nx	Mx	no_data_supplied	no_data_supplied	blood	90	ever	none.reported	G2Px	24	no	0	post	no_data_supplied	no_data_supplied	2	Pleomorphic ILC	3	2	3	29	3	absent	mild	infiltrative	absent	absent	90	0	10	0	0	0	positive	negative	negative	Luminal
560	PD9597	female	51	52	tumour_primary	no_data_supplied	complete_remission	not_applicable	no_data_supplied	523	II	T2	N0	Mx	no_data_supplied	pre	blood	no_data_supplied	never	none.reported	G1P1	40	no	0	pre	0	0	0	ILC	3	2	1	1	2	absent	mild	infiltrative	absent	absent	60	20	10	10	0	0	positive	positive	negative	Luminal
560	PD18748	female	54	no_data_supplied	tumour_primary	no_data_supplied	no_data_supplied	no_data_supplied	no_data_supplied	no_data_supplied	II	Tx	Nx	Mx	no_data_supplied	pre	blood	70	unknown	none.reported	GxPx	no_data_supplied	not.known	no_data_supplied	no_data_supplied	no_data_supplied	0	0	ILC	3	2	1	2	2	absent	moderate	infiltrative	absent	absent	70	0	20	0	0	10	positive	positive	negative	Luminal
560	PD14465	female	63	67	tumour_primary	alive	no_data_supplied	no_data_supplied	no_data_supplied	1515	II	T3	N2	M0	no_data_supplied	pre	blood	60	ever	none.reported	G2Px	no_data_supplied	yes	5	post	no_data_supplied	6	0	ILC	3	2	1	1	2	absent	moderate	infiltrative	absent	absent	80	0	15	0	0	5	positive	positive	negative	Luminal
560	PD11342	female	55	58	tumour_primary	alive	no_data_supplied	no_data_supplied	no_data_supplied	1032	II	T2	N1	M0	no_data_supplied	pre	blood	80	unknown	none.reported	G1Px	32	yes	32	no_data_supplied	no_data_supplied	7	2	ILC	3	2	1	0	2	present	mild	infiltrative	absent	absent	75	0	5	0	0	20	positive	positive	negative	Luminal
560	PD13766	female	45	49	tumour_primary	alive	complete_remission	not_applicable	not_applicable	1399	II	Tx	Nx	Mx	no_data_supplied	pre	adjacent_breast_tissue	90	unknown	none.reported	G3P3	no_data_supplied	not.known	no_data_supplied	pre	0	0	0	Pleomorphic ILC	3	3	1	5	2	absent	mild	infiltrative	present	absent	90	0	5	0	0	5	positive	positive	negative	Luminal
560	PD13630	female	43	46	tumour_local_recurrence	deceased	progression	563	987	987	no_data_supplied	T2	N1	M0	no_data_supplied	post	adjacent_breast_tissue	50	unknown	none.reported	GxPx	no_data_supplied	not.known	no_data_supplied	pre	0	2	0	ILC	3	2	1	1	2	absent	mild	infiltrative	absent	absent	87	0	1	1	1	10	positive	positive	negative	Luminal
560	PD14460	female	52	54	tumour_primary	alive	no_data_supplied	no_data_supplied	no_data_supplied	846	III	T2	N2	M0	no_data_supplied	pre	blood	58	ever	none.reported	GxPx	no_data_supplied	yes	15	no_data_supplied	no_data_supplied	5	0	ILC	3	2	2	10	2	absent	severe	infiltrative	absent	absent	75	5	15	5	0	0	positive	positive	negative	Luminal
560	PD18259	female	48	48	tumour_primary	alive	complete_remission	not_applicable	no_data_supplied	106	III	T3	N1	Mx	no_data_supplied	pre	no_data_supplied	no_data_supplied	unknown	none.reported	G0P0	not_applicable	yes	2	post	no_data_supplied	2	0	ILC	3	2	1	4	2	absent	mild	infiltrative	absent	absent	69	10	5	5	1	10	positive	positive	negative	Luminal
560	PD7243	female	57	no_data_supplied	tumour_primary	no_data_supplied	no_data_supplied	no_data_supplied	no_data_supplied	496	no_data_supplied	T2	N2	M0	BRCA1/2.screen.negative	pre	blood	70	unknown	none.reported	no_data_supplied	no_data_supplied	not.known	no_data_supplied	no_data_supplied	no_data_supplied	no_data_supplied	no_data_supplied	ILC	no_data_supplied	no_data_supplied	no_data_supplied	no_data_supplied	no_data_supplied	no_data_supplied	no_data_supplied	no_data_supplied	no_data_supplied	no_data_supplied	no_data_supplied	no_data_supplied	no_data_supplied	no_data_supplied	no_data_supplied	no_data_supplied	positive	positive	negative	Luminal
560	PD11742	female	55	55	tumour_primary	alive	no_data_supplied	no_data_supplied	not_applicable	60	III	Tx	Nx	Mx	no_data_supplied	pre	skin	75	unknown	none.reported	G3P3	39	no	0	post	0	0	0	ILC	3	2	3	23	3	present	moderate	infiltrative	absent	absent	no_data_supplied	no_data_supplied	no_data_supplied	no_data_supplied	no_data_supplied	no_data_supplied	positive	positive	negative	Luminal
560	PD4604	female	49	58	tumour_primary	alive	complete_remission	not_applicable	not_applicable	3305	III	T3	N2	M0	no_data_supplied	pre	blood	60	unknown	none.reported	G0P0	not_applicable	no	0	post	0	4	2	ILC	3	2	2	10	2	absent	moderate	infiltrative	absent	absent	45	5	10	20	0	20	positive	positive	negative	Luminal
560	PD11748	female	47	48	tumour_primary	alive	complete_remission	not_applicable	not_applicable	180	III	Tx	Nx	Mx	no_data_supplied	pre	skin	50	unknown	none.reported	GxPx	no_data_supplied	yes	Yes_unspecified_time	post	0	1	0	Pleomorphic ILC	3	3	2	9	3	absent	moderate	pushing_>50%	absent	absent	no_data_supplied	no_data_supplied	no_data_supplied	no_data_supplied	no_data_supplied	no_data_supplied	negative	negative	negative	Triple negative
560	PD4977	female	48	64	tumour_primary	deceased	progression	3288	5753	0	III	T4	N1	Mx	no_data_supplied	post	blood	no_data_supplied	unknown	none.reported	GxP2	no_data_supplied	not.known	no_data_supplied	post	no_data_supplied	11	0	ILC	3	3	3	23	3	absent	nil	infiltrative	absent	absent	70	0	25	0	0	5	negative	negative	negative	Triple negative
FBC	FBC016006	Female	55								II	T2			BRCA2														BRCA2 ILC					2												Positive	Negative	Negative	Luminal
FBC	FBC016050	Female	65								III	T3			BRCA1														BRCA2 ILC					3												Positive	Positive	Negative	Luminal
FBC	FBC050018	Female	41.4192								II	T1			BRCA2														BRCA2 ILC					2												Positive	Positive	Negative	Luminal
FBC	FBC060743	Female	54.2384								II	T3			non-BRCA1/2														non-BRCA1/2 ILC					2												Positive	Positive	Positive	Luminal/HER2
FBC	FBC070169	Female	74.5616								II	T2			non-BRCA1/2														non-BRCA1/2 ILC					2												Positive	Negative	NA	Luminal
TCGA	TCGA-A2-A3KC-01	Female									no_data_supplied																		TCGA ILC																	Positive	Positive	Negative	Luminal
TCGA	TCGA-AR-A2LK-01	Female									III																		TCGA ILC																	Positive	Positive	Negative	Luminal
TCGA	TCGA-E2-A1LG-01	Female									no_data_supplied																		TCGA ILC																	Negative	Negative	Negative	Triple negative
TCGA	TCGA-EW-A1J5-01	Female									II																		TCGA ILC																	Positive	Positive	Negative	Luminal
[truncated: 116 more columns]
